# Supplementary material for: The first structural and spectroscopic characterisation of a ring-opened form of a 2H-naphtho[1,2-b]pyran: a novel photomerocyanine
Source: Royal Society of Chemistry journal article supplement (doi:10.1039/c4cc03435j), 2014-01-01

## ELECTRONIC SUPPLEMENTARY INFORMATION

### The first structural and spectroscopic characterisation of a ring-opened form of a *2H-naphtho[1,2-*b*]pyran: a novel photomerocyanine*

Stuart Aiken,<sup>a</sup> Kathryn Booth,<sup>a</sup> Christopher D. Gabbutt,<sup>a</sup> B. Mark Heron,<sup>\*,a</sup>

Craig R. Rice,<sup>a</sup> Azzam Charaf-Eddin<sup>b</sup> and Denis Jacquemin<sup>b,c</sup>

<sup>†</sup>Department of Chemical and Biological Sciences, School of Applied Science,

University of Huddersfield, Queensgate, Huddersfield, HD1 3DH, UK

<sup>‡</sup>CEISAM, UMR CNRS 6230, Chimie Et Interdisciplinarité, Synthèse, Analyse, Modélisation,

Université de Nantes, Faculté des Sciences et des Techniques, BP 92208,

2, rue de la Houssinière, F-44322 Nantes Cedex 3 France.

<sup>§</sup>Institut Universitaire de France (IUF), 103 blvd St Michel, F-75005 Paris Cedex 5 France.

| Contents:                                                                                                      | Page N° |
|----------------------------------------------------------------------------------------------------------------|---------|
| Experimental Section – General                                                                                 | 3       |
| Experimental Section - DFT and TD-DFT modelling                                                                | 3       |
| A comment on the acid-mediated isomerization of <b>11</b> → <b>10</b> (Scheme ESI-1)                           | 5       |
| Characterisation data for the photochromic response of pyran <b>9</b> (Table ESI-1)                            | 5       |
| Experimental method for the preparation of photochromic naphthopyrans ( <b>9</b> and <b>13</b> )               | 6       |
| Preparation of 1,1-bis(4-methoxyphenyl)-3-(4-methylphenyl)prop-2-yn-1-ol <b>8b</b>                             | 8       |
| Figure S1 <sup>1</sup> H NMR spectrum of compound <b>8b</b> in commercial CDCl <sub>3</sub>                    | 9       |
| Figure S2 <sup>13</sup> C NMR spectrum of compound <b>8b</b> in commercial CDCl <sub>3</sub>                   | 10      |
| Figure S3 Mass Spectral data for compound <b>8b</b>                                                            | 11      |
| Figure S4 <sup>1</sup> H NMR spectrum of compound <b>9</b> in d <sub>6</sub> -acetone                          | 17      |
| Figure S5 <sup>13</sup> C NMR spectrum of compound <b>9</b> in d <sub>6</sub> -acetone                         | 18      |
| Figure S6 <sup>1</sup> H NMR spectrum of compound <b>9</b> in d <sub>6</sub> -acetone UV irradiated for 30 s   | 19      |
| Figure S7 <sup>1</sup> H NMR spectrum of compound <b>9</b> in d <sub>6</sub> -acetone UV irradiated for 40 min | 20      |
| Figure S8 <sup>1</sup> H NMR spectrum of compound <b>9</b> in commercial CDCl <sub>3</sub>                     | 21      |
| Figure S9 <sup>13</sup> C NMR spectrum of compound <b>9</b> in commercial CDCl <sub>3</sub>                    | 22      |

|                                                                                                                           |    |
|---------------------------------------------------------------------------------------------------------------------------|----|
| Figure S10 $^1\text{H}$ NMR spectrum of compound <b>9</b> in aq. $\text{K}_2\text{CO}_3$ washed $\text{CDCl}_3$           | 23 |
| Figure S11 $^{13}\text{C}$ NMR spectrum of compound <b>9</b> in aq. $\text{K}_2\text{CO}_3$ washed $\text{CDCl}_3$        | 24 |
| Figure S12 Mass Spectral data for compound <b>9</b>                                                                       | 25 |
| Figure S13 $^1\text{H}$ NMR spectrum of compound <b>10</b> in $d_6$ -acetone                                              | 31 |
| Figure S14 $^{13}\text{C}$ NMR spectrum of compound <b>10</b> in $d_6$ -acetone                                           | 32 |
| Figure S15 HSQC spectrum of compound <b>10</b> in $d_6$ -acetone                                                          | 33 |
| Figure S16 HMBC spectrum of compound <b>10</b> in $d_6$ -acetone                                                          | 34 |
| Figure S17 COSY spectrum of compound <b>10</b> in $d_6$ -acetone (aromatic region)                                        | 35 |
| Figure S18 NOE spectrum of compound <b>10</b> in $d_6$ -acetone                                                           | 36 |
| Figure S19 Mass Spectral data for compound <b>10</b>                                                                      | 37 |
| Figure S20 $^1\text{H}$ NMR spectrum of compound <b>9</b> in $d_6$ -acetone + $\text{CF}_3\text{CO}_2\text{H}$ after 2 h  | 43 |
| Figure S21 $^1\text{H}$ NMR spectrum of compound <b>10</b> in $d_6$ -acetone + $\text{CF}_3\text{CO}_2\text{H}$ after 2 h | 44 |
| Figure S22 $^1\text{H}$ NMR spectrum of compound <b>12</b> in commercial $\text{CDCl}_3$                                  | 45 |
| Figure S23 $^{13}\text{C}$ NMR spectrum of compound <b>12</b> in commercial $\text{CDCl}_3$                               | 46 |
| Figure S24 Mass Spectral data for compound <b>12</b>                                                                      | 47 |
| Figure S25 $^1\text{H}$ NMR spectrum of compound <b>13</b> in commercial $\text{CDCl}_3$                                  | 53 |
| Figure S26 $^{13}\text{C}$ NMR spectrum of compound <b>13</b> in commercial $\text{CDCl}_3$                               | 54 |
| Figure S27 Mass Spectral data for compound <b>13</b>                                                                      | 55 |
| Cartesian coordinates ( $\text{\AA}$ ) for molecule <b>10</b> (ground-state) obtained<br>by DFT [PCM-PBE0/6-31G(d)]       | 60 |
| Cartesian coordinates ( $\text{\AA}$ ) for molecule <b>10</b> (excited-state) obtained<br>by DFT [PCM-PBE0/6-31G(d)]      | 61 |
| Cartesian coordinates ( $\text{\AA}$ ) for molecule <b>11</b> (ground-state) obtained<br>by DFT [PCM-PBE0/6-31G(d)]       | 62 |
| Cartesian coordinates ( $\text{\AA}$ ) for molecule <b>11</b> (excited-state) obtained<br>by DFT [PCM-PBE0/6-31G(d)]      | 63 |
| Frontier molecular orbitals for <b>10</b> and <b>11</b>                                                                   | 64 |
| Computed vibronic spectra for <b>10</b> and <b>11</b>                                                                     | 65 |

## Experimental Section - General

Unless otherwise stated, reagents were used as supplied by major chemical suppliers.  $^1\text{H}$  (400 MHz) and  $^{13}\text{C}$  (100 MHz) NMR spectra (Bruker Avance) were recorded in either  $\text{CDCl}_3$  or  $\text{d}_6$ -acetone. UV-Irradiation experiments for NMR investigations were performed using typical solution concentrations for NMR spectroscopy with irradiation using a Spectroline 8 Watt TLC inspection lamp at 365 nm with frequent manual agitation. FT-IR spectra were recorded on a Nicolet 380 FT-IR spectrophotometer equipped with a diamond ATR attachment (neat sample). Flash column chromatography was performed on chromatography silica gel (Sigma-Aldrich, 40-63 micron particle size distribution). All compounds were homogeneous by TLC using a range of eluent systems of differing polarity [Merck TLC aluminium sheets either silica gel 60 F254 (cat. No 105554) or neutral aluminium oxide 60 F254 (cat. No 105550)]. High resolution mass spectra were recorded under electrospray ionization using a linear ion trap mass spectrometer [Thermo Scientific LTQ Orbitrap XL Fourier transform mass spectrometer, EPSRC National Mass Spectrometry Service, Swansea]. UV-visible spectra were recorded in spectroscopic grade acetone solutions of the samples (10 mm pathlength quartz cuvette, PTFE capped, concentration ranges *ca.*  $3 \times 10^{-4}$  –  $10^{-5}$  mol  $\text{dm}^{-3}$ ) using an Agilent Technologies Cary 60 spectrophotometer equipped with a temperature controlled (20 °C) stirred cell. Irradiation of the stirred sample solutions was accomplished with a Spectroline 8 Watt TLC inspection lamp at 365 nm. 1,1-Bis(4-methoxyphenyl)prop-2-yn-1-ol **8a** was prepared according to literature procedures.<sup>S1</sup>

## Experimental Section - DFT and TD-DFT modelling

All quantum mechanical simulations have been performed with the Gaussian09 program<sup>S2</sup> using the PBE0 hybrid functional,<sup>S3</sup> and improving the DFT integration grid to *ultrafine* [a pruned (99,590) grid]. First geometry optimizations in acetone have been performed using the PCM (Polarizable Continuum Model) solvent model,<sup>S4</sup> and the 6-31G(d) atomic basis set. In the second step, vibrational calculations were used to establish that the optimized structures corresponded to true minima of the potential energy surface. In the third stage, the first ten lowest-lying singlet excited-states have been determined within the vertical PCM-TD-DFT (Time-Dependent Density Functional Theory) approximation using the 6-31+G(d) atomic basis set and the PBE0 functional. In a fourth stage, the NMR chemical shifts have been obtained by computing shieldings for the investigated molecules and reference (TMS), at the PCM-PBE0/cc-pVTZ level of theory. In addition, we have also determined the optimal geometry and the vibrational frequencies for the first excited-states of **10** and **11**. This allowed to compute vibronic couplings within the FC approximation, with the FC Classes code of Santoro and co-workers,<sup>S5</sup> and hence to determine more

rigorously the relative absorption intensities of the two species. During the FC Classes calculations, the maximal number of integrals was increased to  $10^{12}$ , the other parameters being kept to their default values.

## References

- S1 C. D. Gabbutt, B. M. Heron, A. C. Instone, D. A. Thomas, S. M. Partington, M. B. Hursthouse, T. Gelbrich, *Eur. J. Org. Chem.*, **2003**, 1220.
- S2 Gaussian 09, Revision D.01, Frisch, M. J.; Trucks, G. W.; Schlegel, H. B.; Scuseria, G. E.; Robb, M. A.; Cheeseman, J. R.; Scalmani, G.; Barone, V.; Mennucci, B.; Petersson, G. A.; Nakatsuji, H.; Caricato, M.; Li, X.; Hratchian, H. P.; Izmaylov, A. F.; Bloino, J.; Zheng, G.; Sonnenberg, J. L.; Hada, M.; Ehara, M.; Toyota, K.; Fukuda, R.; Hasegawa, J.; Ishida, M.; Nakajima, T.; Honda, Y.; Kitao, O.; Nakai, H.; Vreven, T.; Montgomery, J. A., Jr.; Peralta, J. E.; Ogliaro, F.; Bearpark, M.; Heyd, J. J.; Brothers, E.; Kudin, K. N.; Staroverov, V. N.; Kobayashi, R.; Normand, J.; Raghavachari, K.; Rendell, A.; Burant, J. C.; Iyengar, S. S.; Tomasi, J.; Cossi, M.; Rega, N.; Millam, N. J.; Klene, M.; Knox, J. E.; Cross, J. B.; Bakken, V.; Adamo, C.; Jaramillo, J.; Gomperts, R.; Stratmann, R. E.; Yazyev, O.; Austin, A. J.; Cammi, R.; Pomelli, C.; Ochterski, J. W.; Martin, R. L.; Morokuma, K.; Zakrzewski, V. G.; Voth, G. A.; Salvador, P.; Dannenberg, J. J.; Dapprich, S.; Daniels, A. D.; Farkas, Ö.; Foresman, J. B.; Ortiz, J. V.; Cioslowski, J.; Fox, D. J. Gaussian, Inc., Wallingford CT, **2009**.
- S3 C. Adamo, V. Barone, *V. J. Chem. Phys.* 1999, **110**, 6158.
- S4 J. Tomasi, B. Mennucci, R. Cammi, *Chem. Rev.* 2005, **105**, 2999.
- S5 See F. J. Avila Ferrer, J. Cerezo, E. Stendardo, R. Improta, F. Santoro, *J. Chem. Theory Comput.* 2013, **9**, 2072 and references therein.

### A comment on the acid-mediated isomerization of **11** → **10**

Protonation of the carbonyl group in **11** induces polarization in the dienone system. Concomitant reduction in the C1'-C2 bond order facilitates rotational isomerization to the less hindered (*E*)-isomer **10** (Scheme ESI-1)

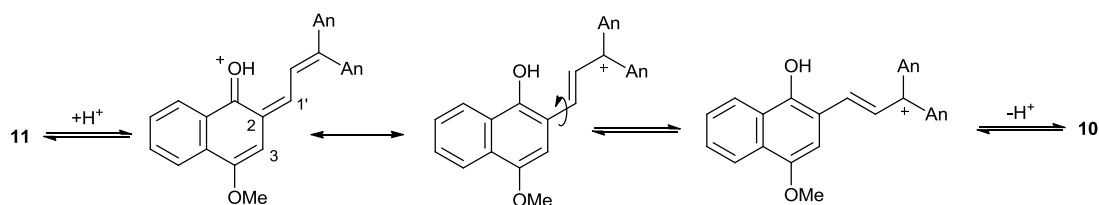

**Scheme ESI-1**

### Characterisation data for the photochromic response of pyran **9**

**Table ESI-1**

|          | $\lambda_{\max}$ (nm) <sup>a</sup> | $A_0$ <sup>b</sup> | $A_t$ <sup>c</sup> | $\Delta_{OD}$ <sup>d</sup> | $K$ (min <sup>-1</sup> ) <sup>e</sup> | $t_{1/2}$ (min) <sup>f</sup> |
|----------|------------------------------------|--------------------|--------------------|----------------------------|---------------------------------------|------------------------------|
| <b>9</b> | 496                                | 0.033              | 0.647              | 0.614                      | 0.0164                                | 42.3                         |

Footnotes: <sup>a</sup>  $\lambda_{\max}$  = wavelength of maximum absorption after 2700 s of UV-irradiation in acetone solution at 20 °C; <sup>b</sup>  $A_0$  = absorbance before UV-irradiation; <sup>c</sup>  $A_t$  = absorbance post UV-irradiation for 2700 s; <sup>d</sup>  $\Delta_{OD}$  = difference in absorbance (Optical Density) between  $A_0$  and  $A_t$ ; <sup>e</sup>  $K$  = fading rate constant at 20 °C; <sup>f</sup>  $t_{1/2}$  = time taken for the absorbance value to fall to half of  $A_t$ .

The above data is presented in accord with such characterisation data reported by other authors for the characterisation of the photochromic response of diaryl substituted naphthopyrans.<sup>1</sup>

1. See for example: (a) C. M. Sousa, J. Berthet, S. Delbaere, P. J. Coelho, *J. Org. Chem.*, 2013, **78**, 6956; (b) C. M. Sousa, J. Berthet, S. Delbaere, P. J. Coelho, *J. Org. Chem.*, 2012, **77**, 3959; (c) K. Guo, Y. Chen, *J. Mater. Chem.*, 2010, **20**, 4193; (d) N. Malic, J. A. Campbell, R. A. Evans, *Macromolecules*, 2008, **41**, 1206; (e) W. Zhao, E. M. Carreira, *Org. Lett.*, 2006, **8**, 99; (f) M. Zayat, D. Levy, *J. Mater. Chem.*, 2003, **13**, 727.

## Experimental method for the preparation of photochromic naphthopyrans

A solution of 4-methoxynaphthol (1.0g, 5.75 mmol) and the requisite 1,1-bis(4-methoxyphenyl)prop-2-yn-1-ol (1 mole equiv.), in the presence of pyridinium *p*-toluenesulfonate (PPTS) (75 mg, 0.30 mmol) and trimethyl orthoformate (1.22 g, 11.5 mmol) in 1,2-dichloroethane (50 mL), was heated under reflux for up to 4 h (the reaction time being determined by TLC examination of the reaction mixture). The cooled solvent was removed under vacuum to afford a brown gum that was either purified by flash column chromatography or by crystallisation. The following compounds were obtained in this manner:

**6-Methoxy-2,2-bis(4-methoxyphenyl)-2*H*-naphtho[1,2-*b*]pyran 9** from 4-methoxy-1-naphthol and 1,1-bis(4-methoxyphenyl)prop-2-yn-1-ol (fraction 1) as a pale pink ‘fluffy’ solid (894 mg, 36.7 %) after column chromatography using 20 % EtOAc in hexane, mp = 116 – 118 °C;  $\nu_{\max}$  3001, 2962, 2836, 1607, 1509, 1458, 1388, 1271, 1248, 1215, 1175, 1161, 1101, 1059, 1031, 989, 971, 828, 662, 555  $\text{cm}^{-1}$ ;  $\delta_{\text{H}}$  ( $d_6$ -acetone) 3.69 (6H, s, OMe), 3.90 (3H, s, OMe), 6.31 (1H, d,  $J = 9.6$  Hz, 3-H), 6.69 (1H, s, 5-H), 6.77 (1H, d,  $J = 9.6$  Hz, 4-H), 6.84 (4H, d,  $J = 8.6$  Hz, Ar-H), 7.45 (5H, m, Ar-H), 7.54 (1H, m, Ar-H), 8.13 (1H, d,  $J = 8.3$  Hz, 7-H), 8.33 (1H, d,  $J = 8.3$  Hz, 10-H);  $\delta_{\text{C}}$  ( $d_6$ -acetone) 54.60, 55.17, 82.21, 102.47, 113.32, 115.81, 121.52, 121.94, 123.92, 125.57, 125.60, 126.14, 126.33, 127.92, 128.97, 137.55, 141.31, 149.60, 159.00. (Found  $\text{M}+\text{H}^+$ , 425.1747;  $\text{C}_{28}\text{H}_{24}\text{O}_4$  requires  $\text{M}+\text{H}^+$ , 425.1747). Fraction 2, (*E*)-2-(3',3'-bis(4-methoxyphenyl)allylidene)-4-methoxynaphthalen-1(2*H*)-one **10** as deep maroon, lustrous microcrystals (290 mg, 11.9 %), mp = 174 – 176 °C;  $\nu_{\max}$  2932, 2834, 1641, 1602, 1589, 1527, 1505, 1373, 1287, 1241, 1176, 1021, 908, 833, 770, 700, 560  $\text{cm}^{-1}$ ;  $\delta_{\text{H}}$  ( $d_6$ -acetone) 3.84 (3H, s, OMe), 3.90 (3H, s, OMe), 4.02 (3H, s, 4-OMe), 6.82 (1H, s, 3-H), 6.94 (2H, d,  $J = 8.8$  Hz, Ar-H), 7.05 (2H, d,  $J = 8.6$  Hz, Ar-H), 7.21 (2H, d,  $J = 8.6$  Hz, Ar-H), 7.38 (3H, m, Ar-H, 2'-H), 7.48 (1H, m, Ar-H), 7.55 (1H, d,  $J = 12.7$  Hz, 1'-H), 7.68 (1H, m, Ar-H), 7.85 (1H, d,  $J = 7.9$  Hz, 5-H), 8.10 (1H, d,  $J = 7.7$  Hz, 8-H);  $\delta_{\text{H}}$  ( $\text{CDCl}_3$ ) 3.85 (3H, s, OMe), 3.88 (3H, s, OMe), 3.97 (3H, s, 4-OMe), 6.45 (1H, s, 3-H), 6.90 (2H, d,  $J = 8.5$  Hz, Ar-H), 6.96 (2H, d,  $J = 8.4$  Hz, Ar-H), 7.11 (1H, d,  $J = 12.6$  Hz, 2'-H), 7.22 (2H, d,  $J = 8.4$  Hz, Ar-H), 7.36 (2H, d,  $J = 8.5$  Hz, Ar-H), 7.41 (1H, m, Ar-H), 7.61 (1H, m, Ar-H), 7.66 (1H, d,  $J = 12.6$  Hz, 1'-H), 7.85 (1H, d,  $J = 7.9$  Hz, 5-H), 8.21 (1H, d,  $J = 7.7$  Hz, 8-H);  $\delta_{\text{C}}$  ( $d_6$ -acetone) 54.80, 54.85, 55.14, 97.17, 113.72, 113.81, 120.85, 122.56, 126.91, 128.18, 130.02, 130.04, 131.38, 131.72, 132.30, 133.03, 134.04, 134.60, 134.90, 150.31, 152.36, 160.19, 160.69, 183.01. (Found  $\text{M}+\text{H}^+$ , 425.1747;  $\text{C}_{28}\text{H}_{24}\text{O}_4$  requires  $\text{M}+\text{H}^+$ , 425.1747).

**6-Methoxy-2,2-bis(4-methoxyphenyl)-4-(4-methylphenyl)-2H-naphtho[1,2-*b*]pyran 12** from 4-methoxy-1-naphthol and 1,1-bis(4-methoxyphenyl)-3-(4-methylphenyl)prop-2-yn-1-ol (fraction 1) as pale fawn fluffy solid, (2.04 g, 69.2 %) after crystallisation twice from hexane and EtOAc, mp = 197 – 199 °C;  $\nu_{\max}$  2980, 1607, 1508, 1350, 1249, 1173, 1037, 877, 827, 770, 696  $\text{cm}^{-1}$ ;  $\delta_{\text{H}}$  ( $\text{CDCl}_3$ ) 2.43 (3H, s, tolyl-Me), 3.76 (6H, s, OMe), 3.77 (3H, s, OMe), 6.13 (1H, s, 3-H), 6.54 (1H, s, 5-H), 6.82 (4H, d,  $J = 8.3$  Hz, Ar-H), 7.24 (2H, d,  $J = 7.8$  Hz, tolyl-H), 7.42 (2H, d,  $J = 7.8$  Hz, tolyl-H), 7.50 (6H, m, Ar-H, 8-H, 9-H), 8.12 (1H, d,  $J = 8.3$  Hz, 7-H), 8.37 (1H, d,  $J = 8.3$  Hz, 10-H);  $\delta_{\text{C}}$  ( $\text{CDCl}_3$ ) 21.31, 55.21, 55.67, 81.97, 101.72, 113.36, 116.40, 121.89, 122.17, 125.84, 125.89, 126.20, 126.23, 126.62, 128.19, 128.72, 129.12, 135.59, 136.49, 137.56, 137.74, 142.40, 149.08, 158.78. (Found  $\text{M}+\text{H}^+$ , 515.2209;  $\text{C}_{35}\text{H}_{30}\text{O}_4$  requires  $\text{M}+\text{H}^+$ , 515.2217). Column chromatography (25% EtOAc in hexane) of the liquors from the first crystallisation gave fraction 1, further **12** (300 mg, 10.2 %) identical in all aspects to the foregoing material and fraction 2, **1,1-bis(4-methoxyphenyl)-3-(4-methylphenyl)prop-2-enone 13** as deep yellow micro-crystals (180 mg, 8.7 %), mp = 93 – 95 °C;  $\nu_{\max}$  2933, 2836, 1654, 1603, 1506, 1461, 1289, 1244, 1172, 1112, 1029, 827, 753, 575, 549  $\text{cm}^{-1}$ ;  $\delta_{\text{H}}$  ( $\text{CDCl}_3$ ) 2.39 (3H, s, Me), 3.80 (3H, s, OMe), 3.85 (3H, s, OMe), 6.81 (2H, d,  $J = 8.3$  Hz, Ar-H), 6.89 (2H, d,  $J = 8.4$  Hz, Ar-H), 7.01 (1H, s, 2-H), 7.13 (2H, d,  $J = 8.3$  Hz, Ar-H), 7.19 (2H, d,  $J = 7.8$  Hz, tolyl-H), 7.34 (2H, d,  $J = 8.4$  Hz, Ar-H), 7.84 (2H, d,  $J = 7.8$  Hz, tolyl-H);  $\delta_{\text{C}}$  ( $\text{CDCl}_3$ ) 21.67, 55.20, 55.41, 113.44, 113.79, 121.63, 128.84, 129.09, 130.29, 131.43, 131.59, 134.41, 136.23, 143.21, 154.51, 159.79, 160.72, 192.09. (Found  $[\text{M}+\text{H}]^+$  = 359.1636  $\text{C}_{24}\text{H}_{22}\text{O}_3$  requires  $[\text{M}+\text{H}]^+$  = 359.1642).

### Preparation of 1,1-bis(4-methoxyphenyl)-3-(4-methylphenyl)prop-2-yn-1-ol **8b**

*n*-BuLi (2.5 M in hexanes, 41.4 mmol, 16.6 mL) was added slowly to a cold (0 °C) stirred solution of 4-ethynyltoluene (39.4 mmol, 4.58 g) in anhydrous THF (150 mL) under nitrogen. Upon completion of the addition, the cold solution was stirred for 30 min and then 4,4-dimethoxybenzophenone (35.8 mmol, 8.68 g) was added in a single portion and the mixture stirred until none of the benzophenone could be detected by TLC examination of the reaction mixture (~2h). The resulting mixture was poured into water (250 mL) containing brine (30 mL) and the organic layer was separated and the aqueous layer extracted with EtOAc (3 × 50 mL). The organic extracts were combined and washed with water (2 × 100 mL) and dried over anhyd. Na<sub>2</sub>SO<sub>4</sub>. Removal of the solvent afforded the *1,1-bis(4-methoxyphenyl)-3-(4-methylphenyl)prop-2-yn-1-ol* **8b** (12.1 g, 94 %) as a very viscous pale yellow oil,  $\nu_{\max}$  3450, 2952, 2835, 1606, 1584, 1505, 1461, 1301, 1243, 1168, 1031, 986, 899, 8115, 742, 587, 526 cm<sup>-1</sup>;  $\delta_{\text{H}}$  (CDCl<sub>3</sub>) 2.38 (3H, s, Me), 3.28 (1H, s, OH (D<sub>2</sub>O exchangeable)), 3.80 (6H, s, OMe), 6.90 (4H, m, Ar-H), 7.15 (2H, d, J = 7.88 Hz, tolyl-H), 7.42 (2H, m, tolyl-H), 7.62 (4H, m, Ar-H);  $\delta_{\text{C}}$  (CDCl<sub>3</sub>) 21.56, 55.31, 74.18, 86.95, 91.65, 113.56, 119.58, 127.47, 129.13, 131.70, 137.85, 138.74, 158.98. Found [M-H<sub>2</sub>O+H]<sup>+</sup> = 341.1532 C<sub>24</sub>H<sub>22</sub>O<sub>3</sub> requires [M-H<sub>2</sub>O+H]<sup>+</sup> = 341.1536. This material was used directly for the preparation of naphthopyran **13**.



Figure S1  $^1\text{H}$  NMR spectrum of compound **8b** in commercial  $\text{CDCl}_3$

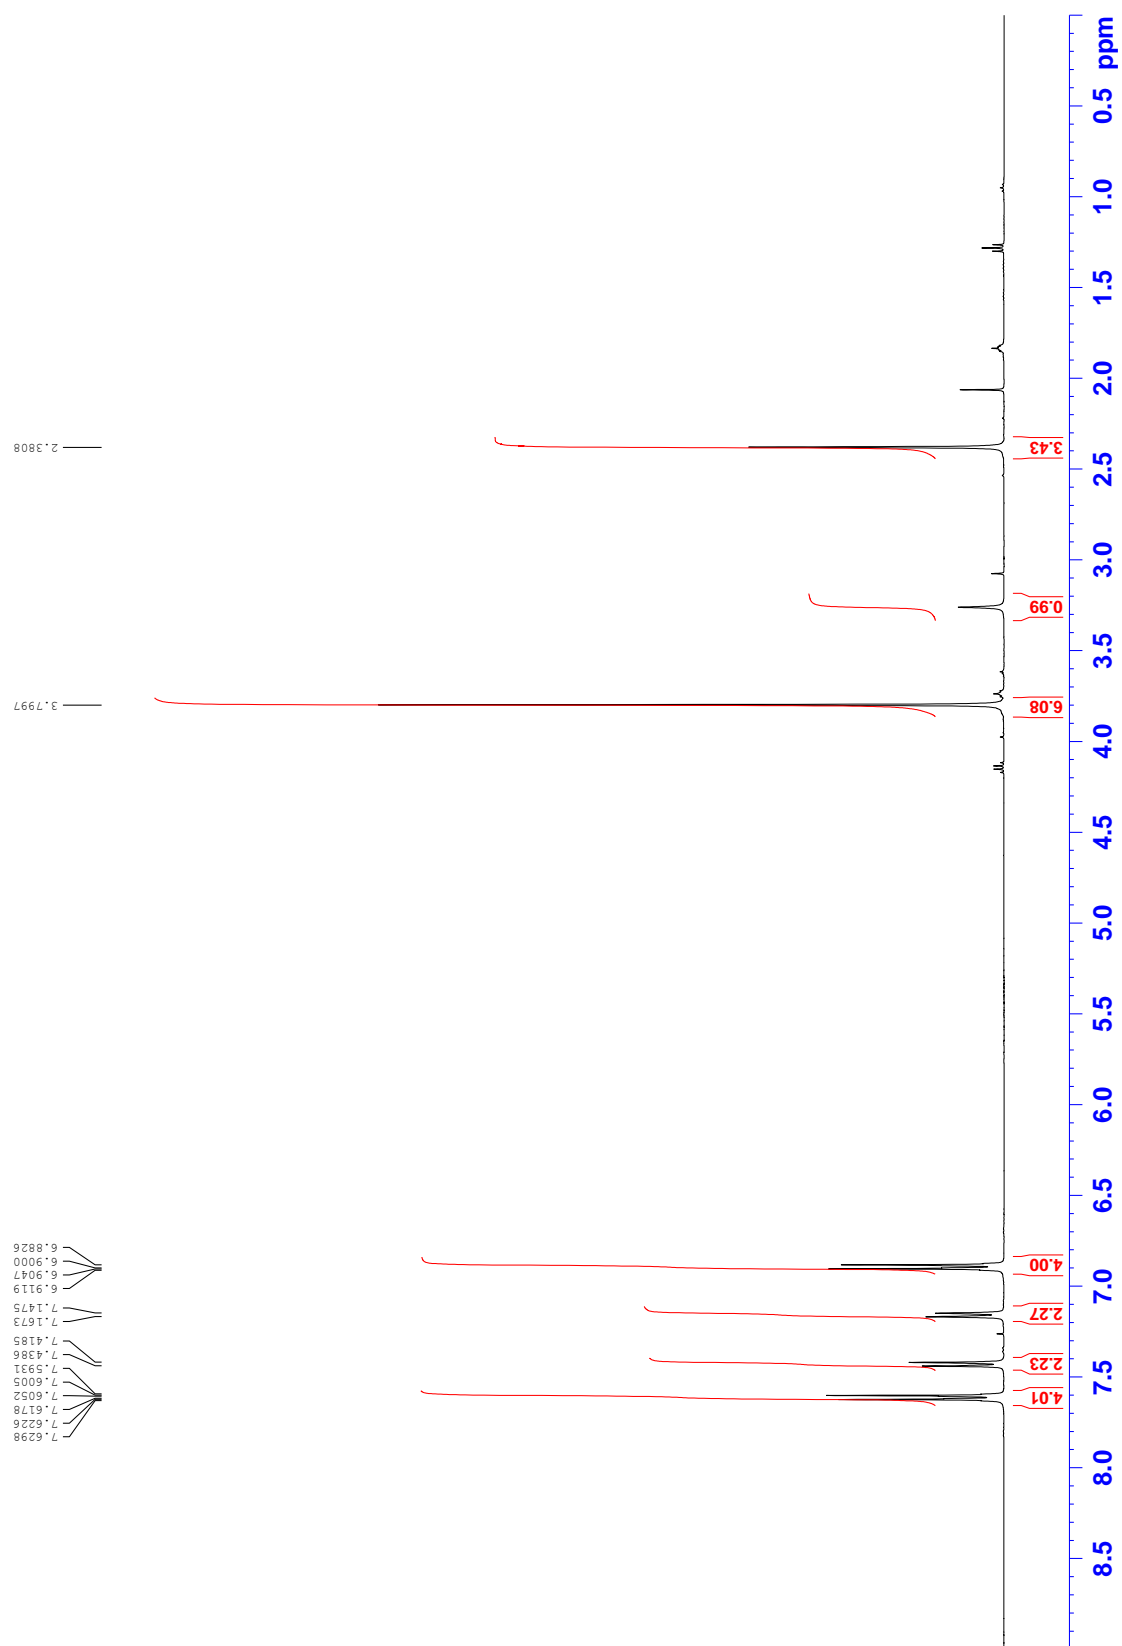

Figure S2  $^{13}\text{C}$  NMR spectrum of compound **8b** in commercial  $\text{CDCl}_3$

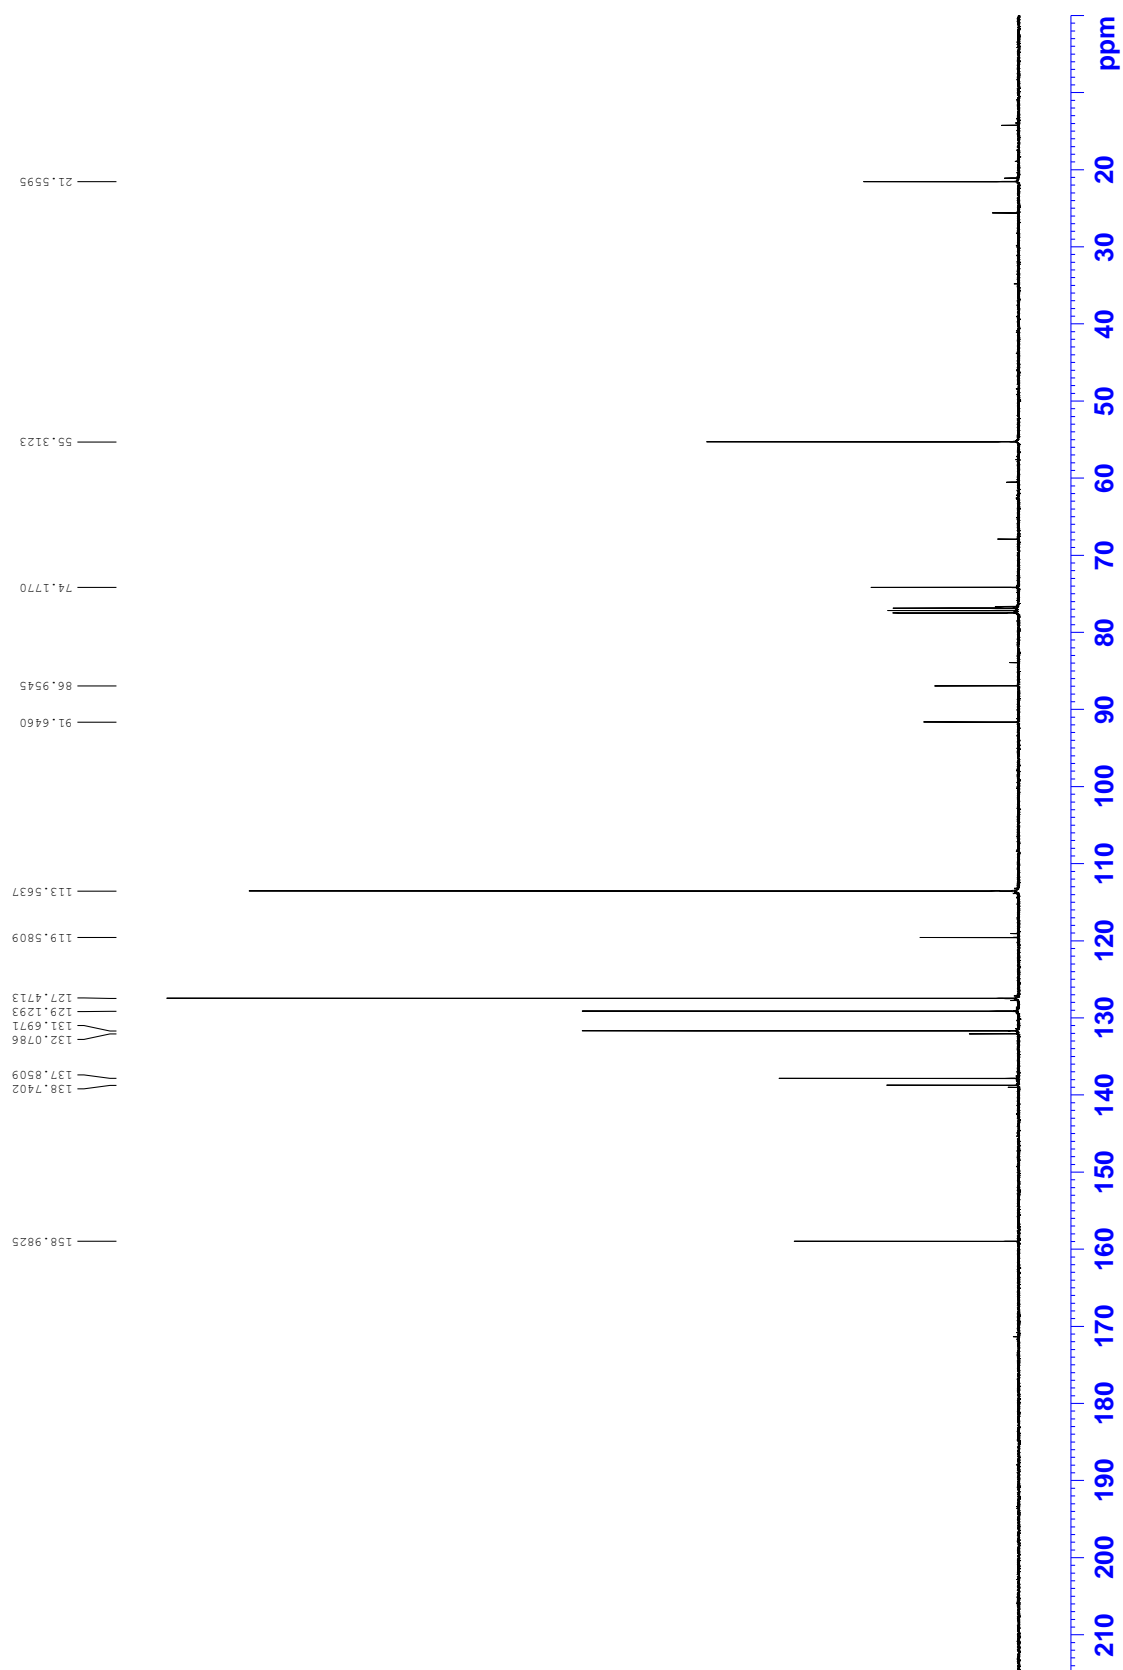

Figure S3 Mass Spectral data for compound **8b**

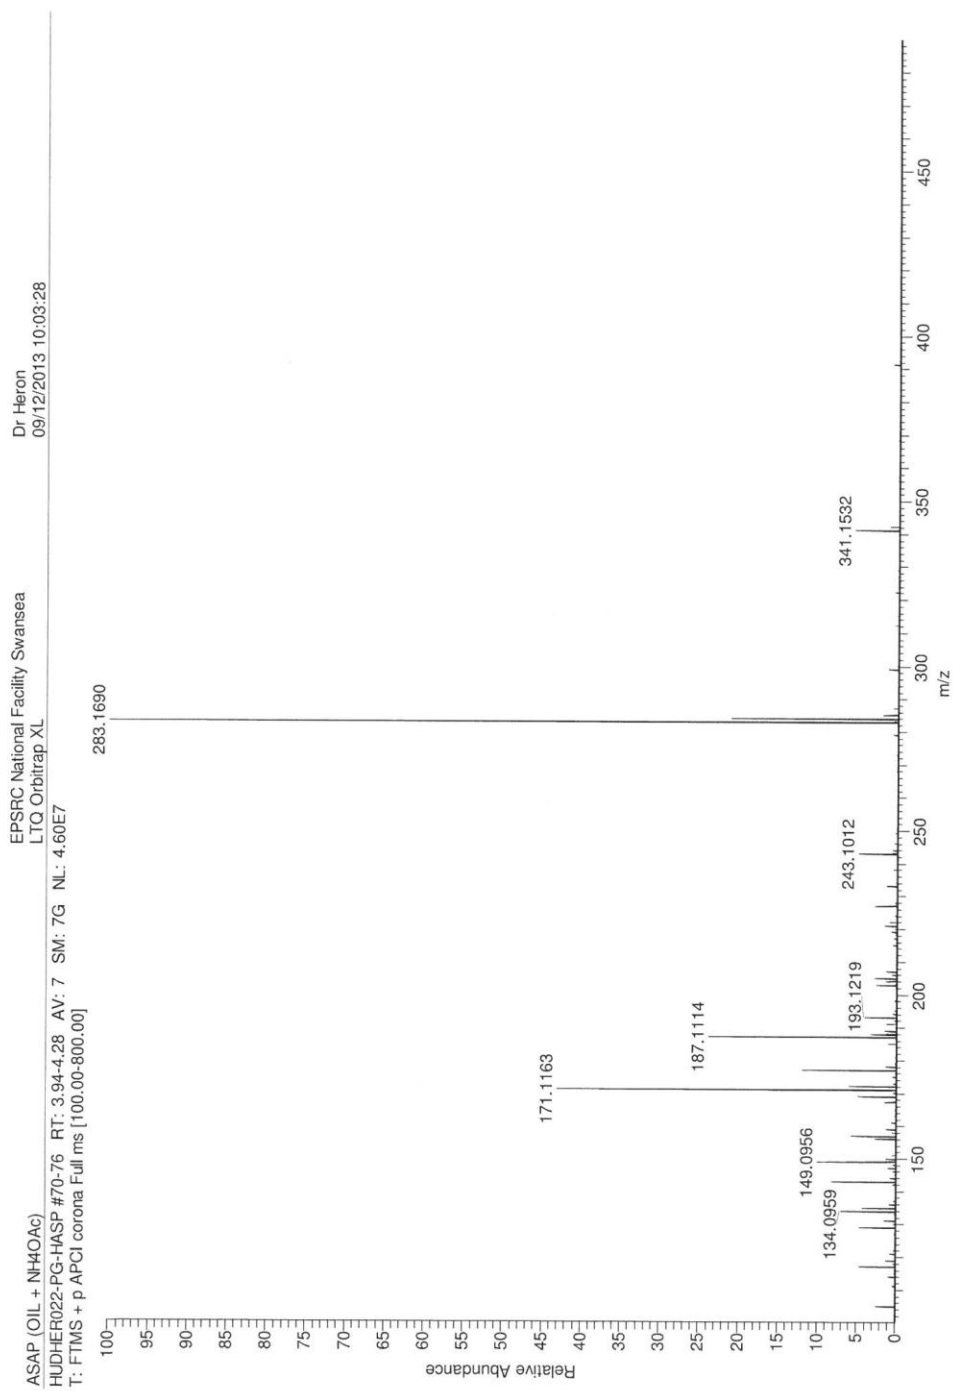

ASAP (OIL + NH<sub>4</sub>OAc) EPSRC National Facility Swansea Dr Heron  
HUDHER022-PG-HASP #70-76 RT: 3.94-4.28 AV: 7 SM: 7G NL: 1.98E7 09/12/2013 10:03:28  
T: FTMS + p.APCI corona Full ms [100.00-800.00] LTQ Orbitrap XL

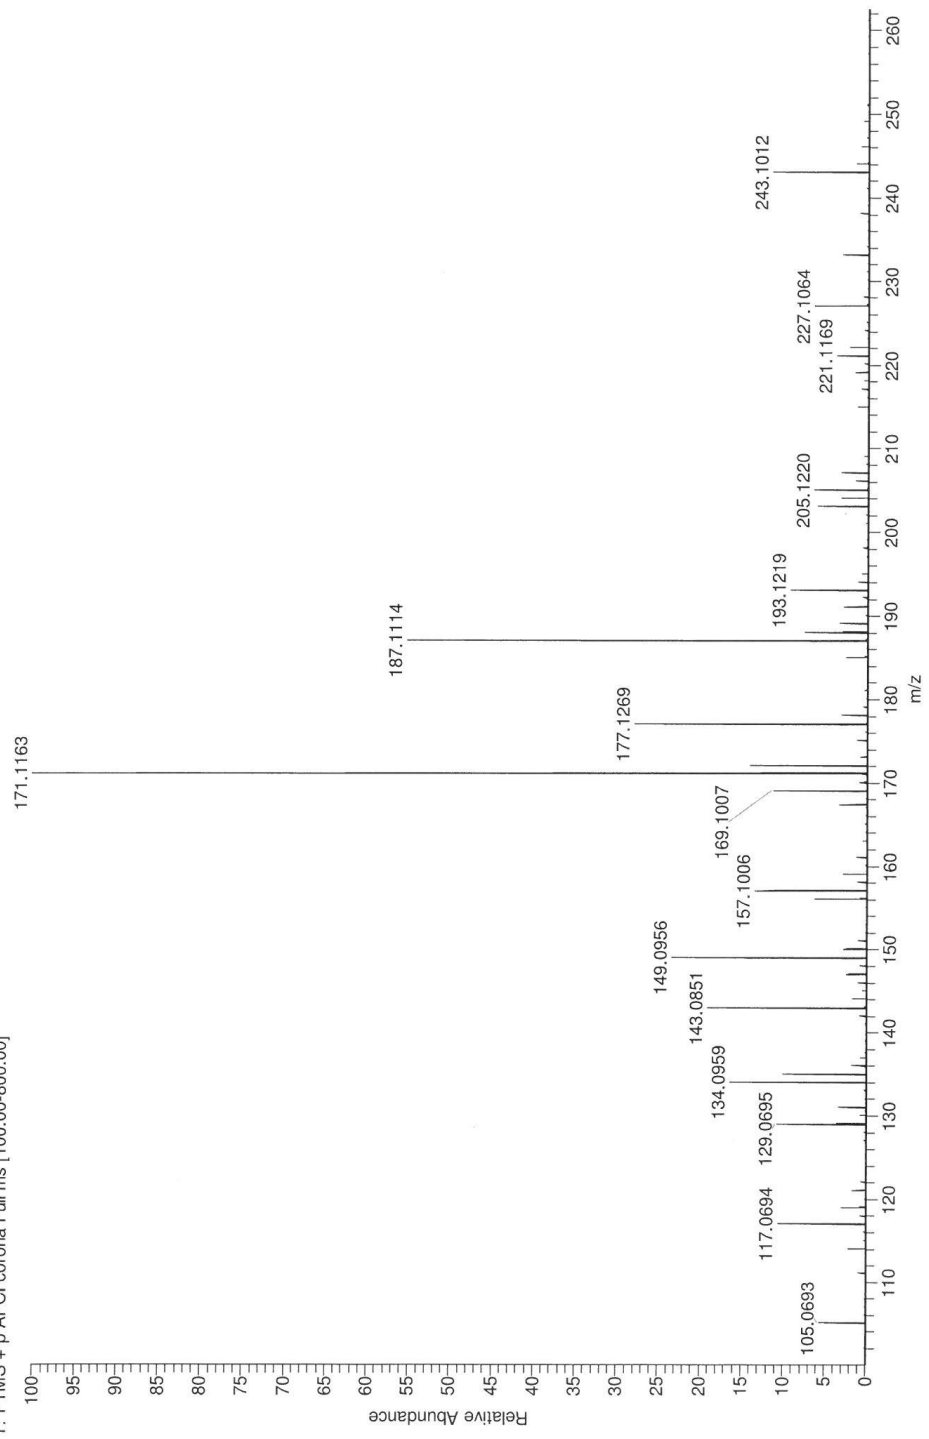

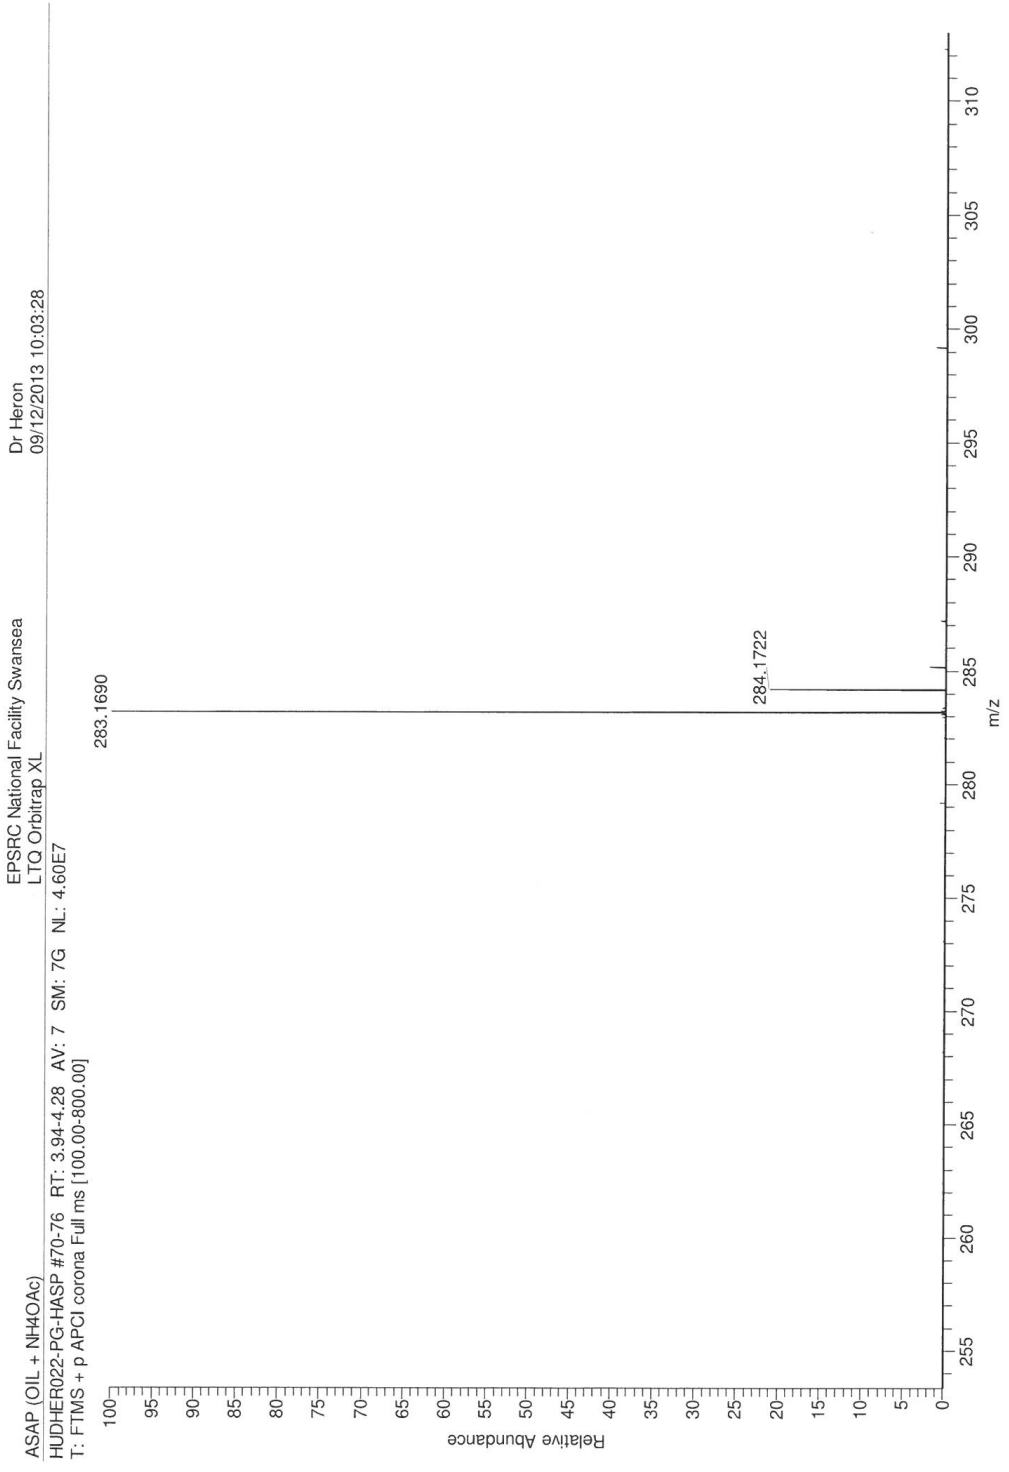

ASAP (OIL + NH4OAc) EPSRC National Facility Swansea Dr Heron  
HUDHER022-PG-HASP #70-76 RT: 3.94-4.28 AV: 7 SM: 7G NL: 2.59E6 LTQ Orbitrap XL 09/12/2013 10:03:28

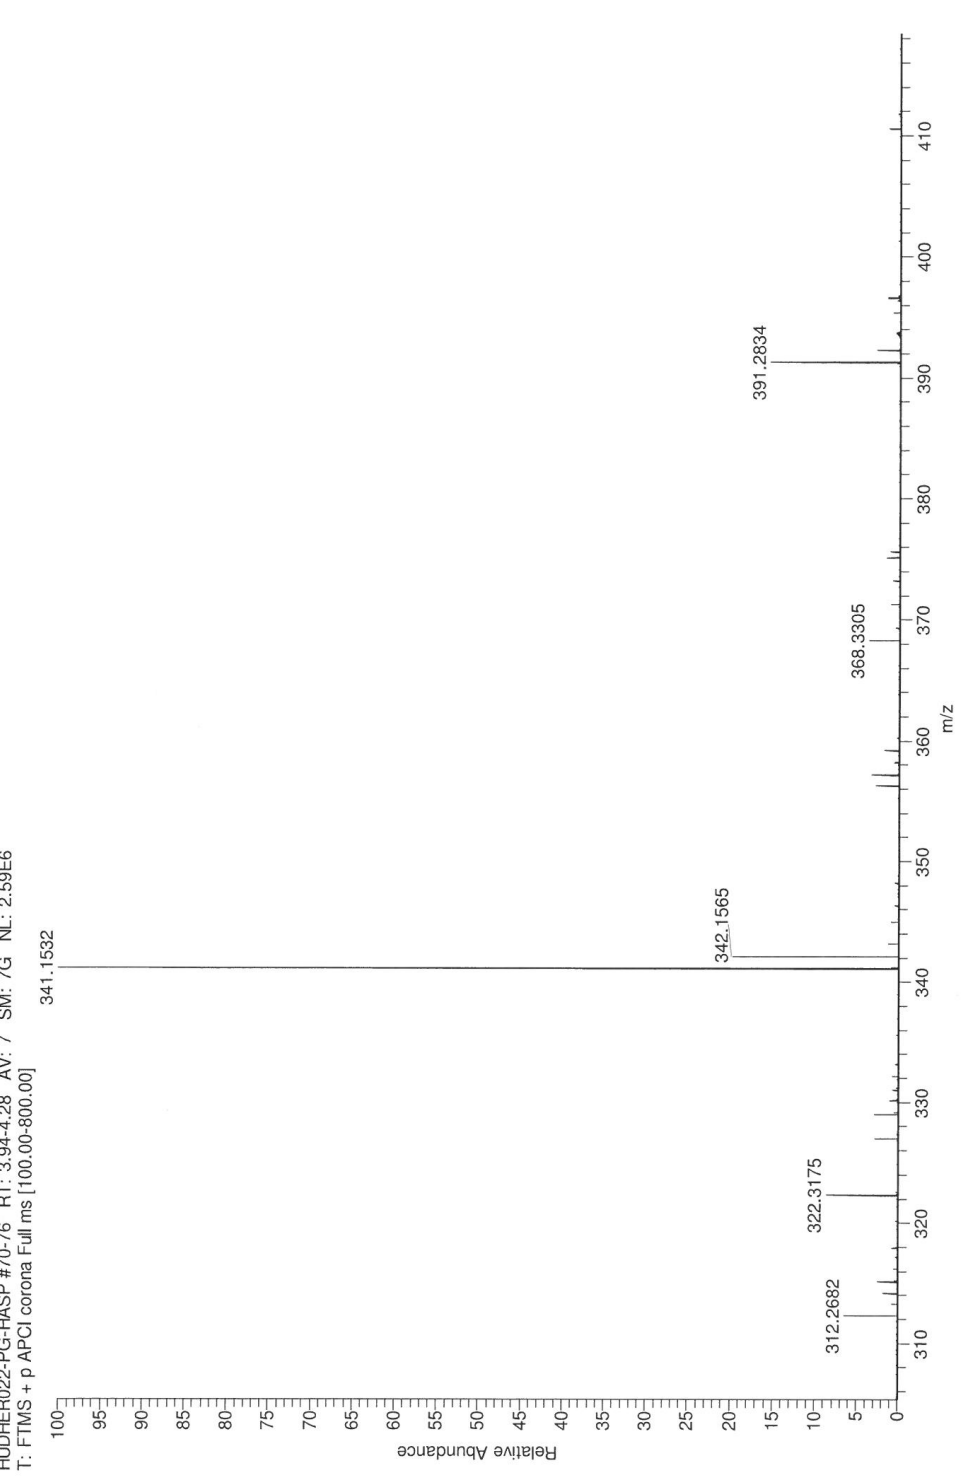

NL:  
2.59E6  
HUDHER022-PG-HASP#70-76  
RT: 3.94-4.28 AV: 7 T: FTMS  
+ p APCI corona Full ms  
[100.00-800.00]

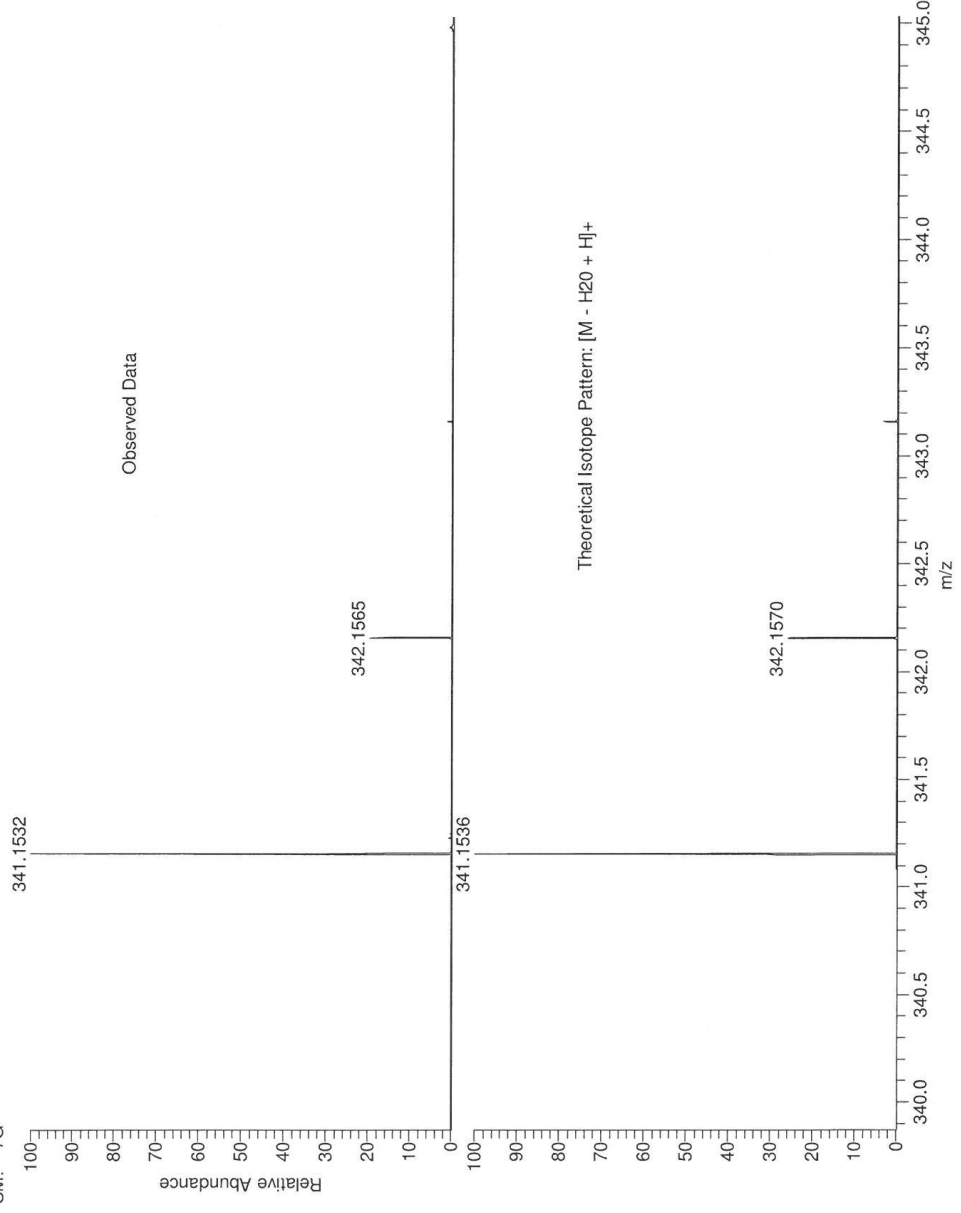

NL:  
1.80E4  
C<sub>24</sub> H<sub>20</sub> O<sub>2</sub> H:  
C<sub>24</sub> H<sub>21</sub> O<sub>2</sub>  
p (gss, s /p:40) Chrg 1  
R: 100000 Res .Pwr . @FWHM

Isotope: Min. ... Max.  
 14 N 0....11  
 16 O 0....10  
 12 C 0....60  
 1 H 0....70  
 23 Na 0....0  
 Tolerance Window: 4- 5.00 ppm  
 Db/Ring Equiv: -3.. 100  
 Fits: 200

N-Rule: Do not use  
 Charge: 1

| Mass     | Theoretical Mass | Delta [ppm] | RDB  | Composition                                                   |
|----------|------------------|-------------|------|---------------------------------------------------------------|
| 341.1532 | 341.1536         | -1.2        | 14.5 | C <sub>14</sub> H <sub>19</sub> O <sub>4</sub>                |
|          | 341.1528         | 1.3         | 2.5  | C <sub>8</sub> H <sub>11</sub> O <sub>4</sub> N <sub>3</sub>  |
|          | 341.1541         | -2.7        | 2.0  | C <sub>8</sub> H <sub>11</sub> O <sub>4</sub> N <sub>3</sub>  |
|          | 341.1523         | 2.7         | 15.0 | C <sub>22</sub> H <sub>19</sub> O <sub>1</sub> N <sub>3</sub> |



Figure S4  $^1\text{H}$  NMR spectrum of compound **9** in  $\text{d}_6$ -acetone

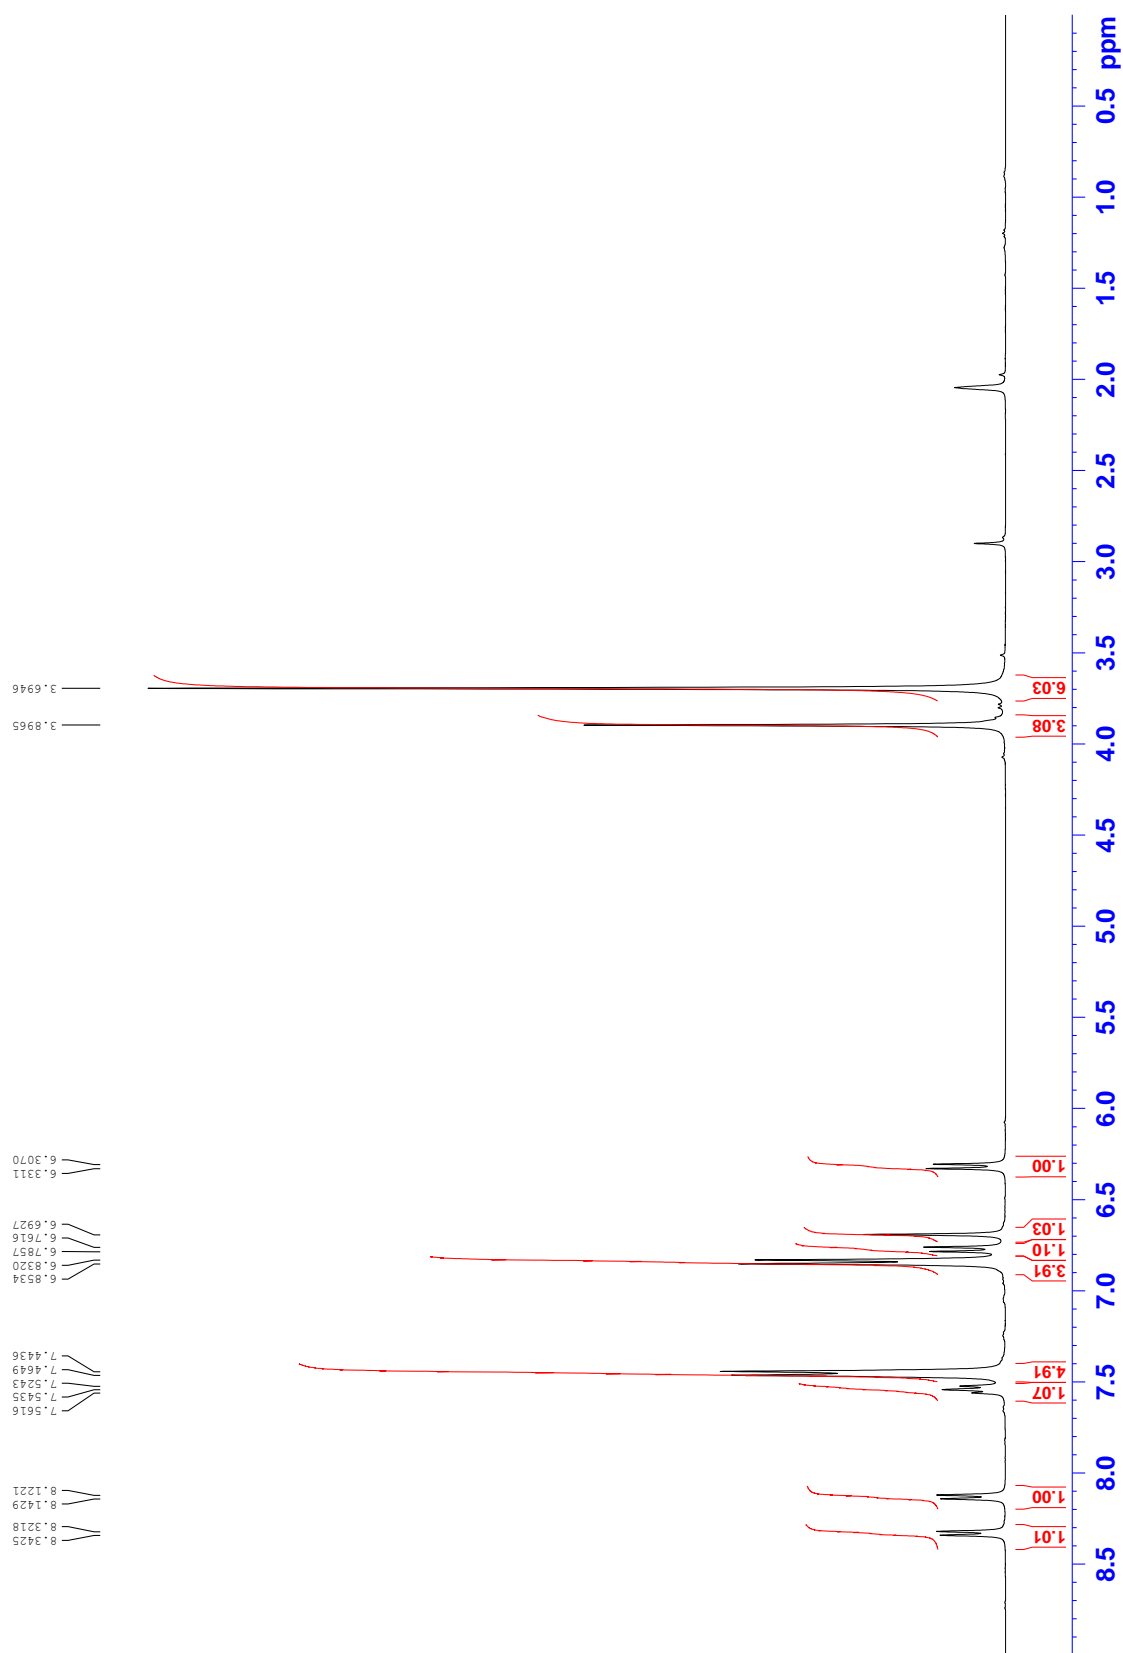

Figure S5  $^{13}\text{C}$  NMR spectrum of compound **9** in  $\text{d}_6$ -acetone

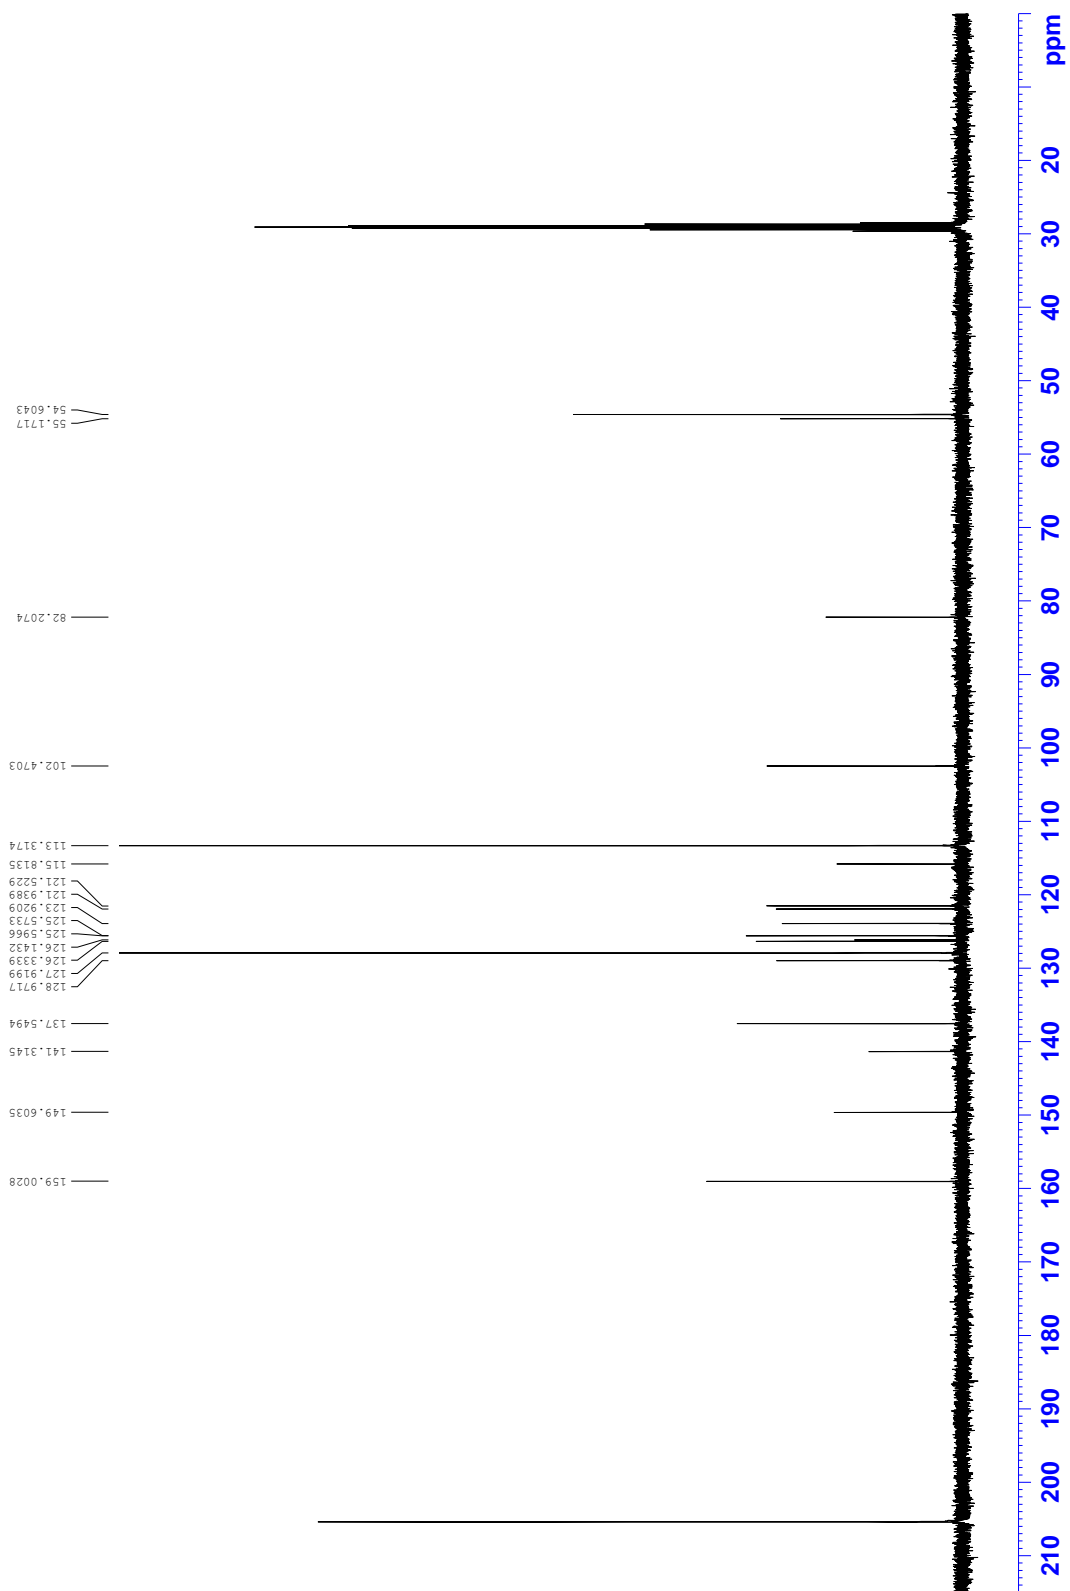

Figure S6  $^1\text{H}$  NMR spectrum of compound **9** in  $\text{d}_6$ -acetone UV irradiated for 30 s

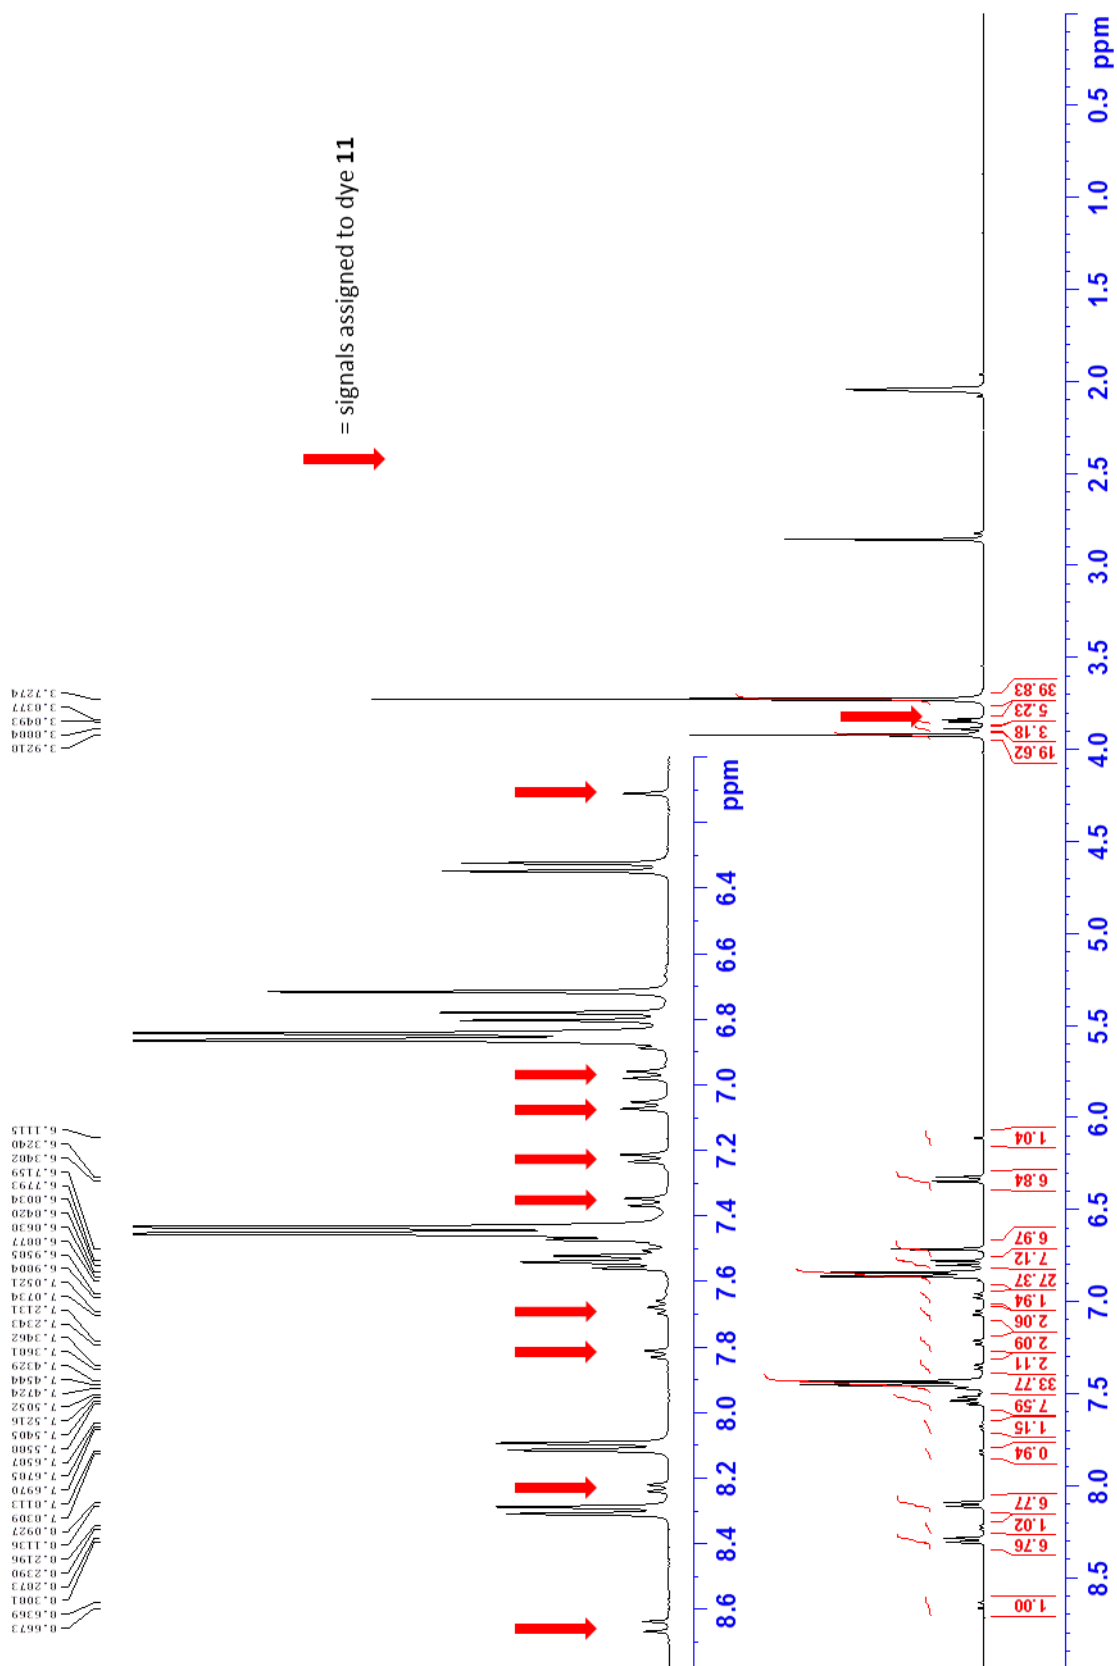

Figure S7  $^1\text{H}$  NMR spectrum of compound **9** in  $\text{d}_6$ -acetone UV irradiated for 40 min

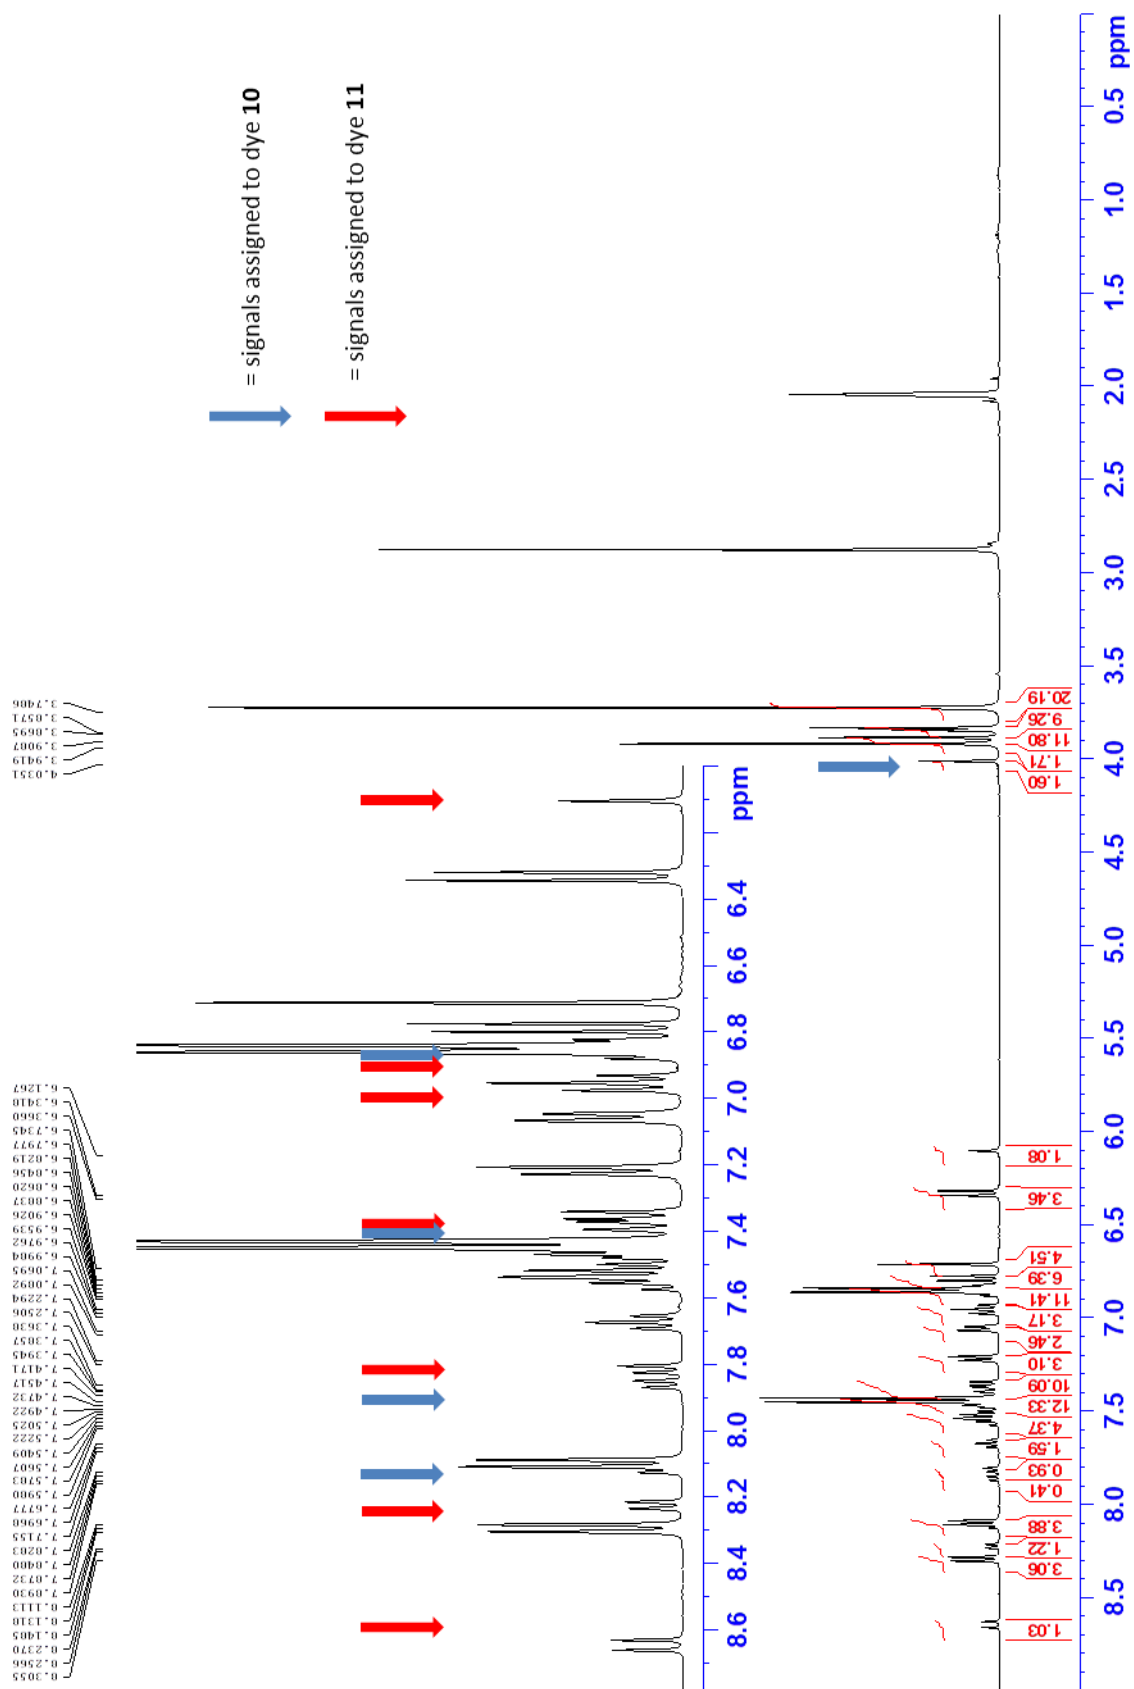

Figure S8  $^1\text{H}$  NMR spectrum of compound **9** in commercial  $\text{CDCl}_3$

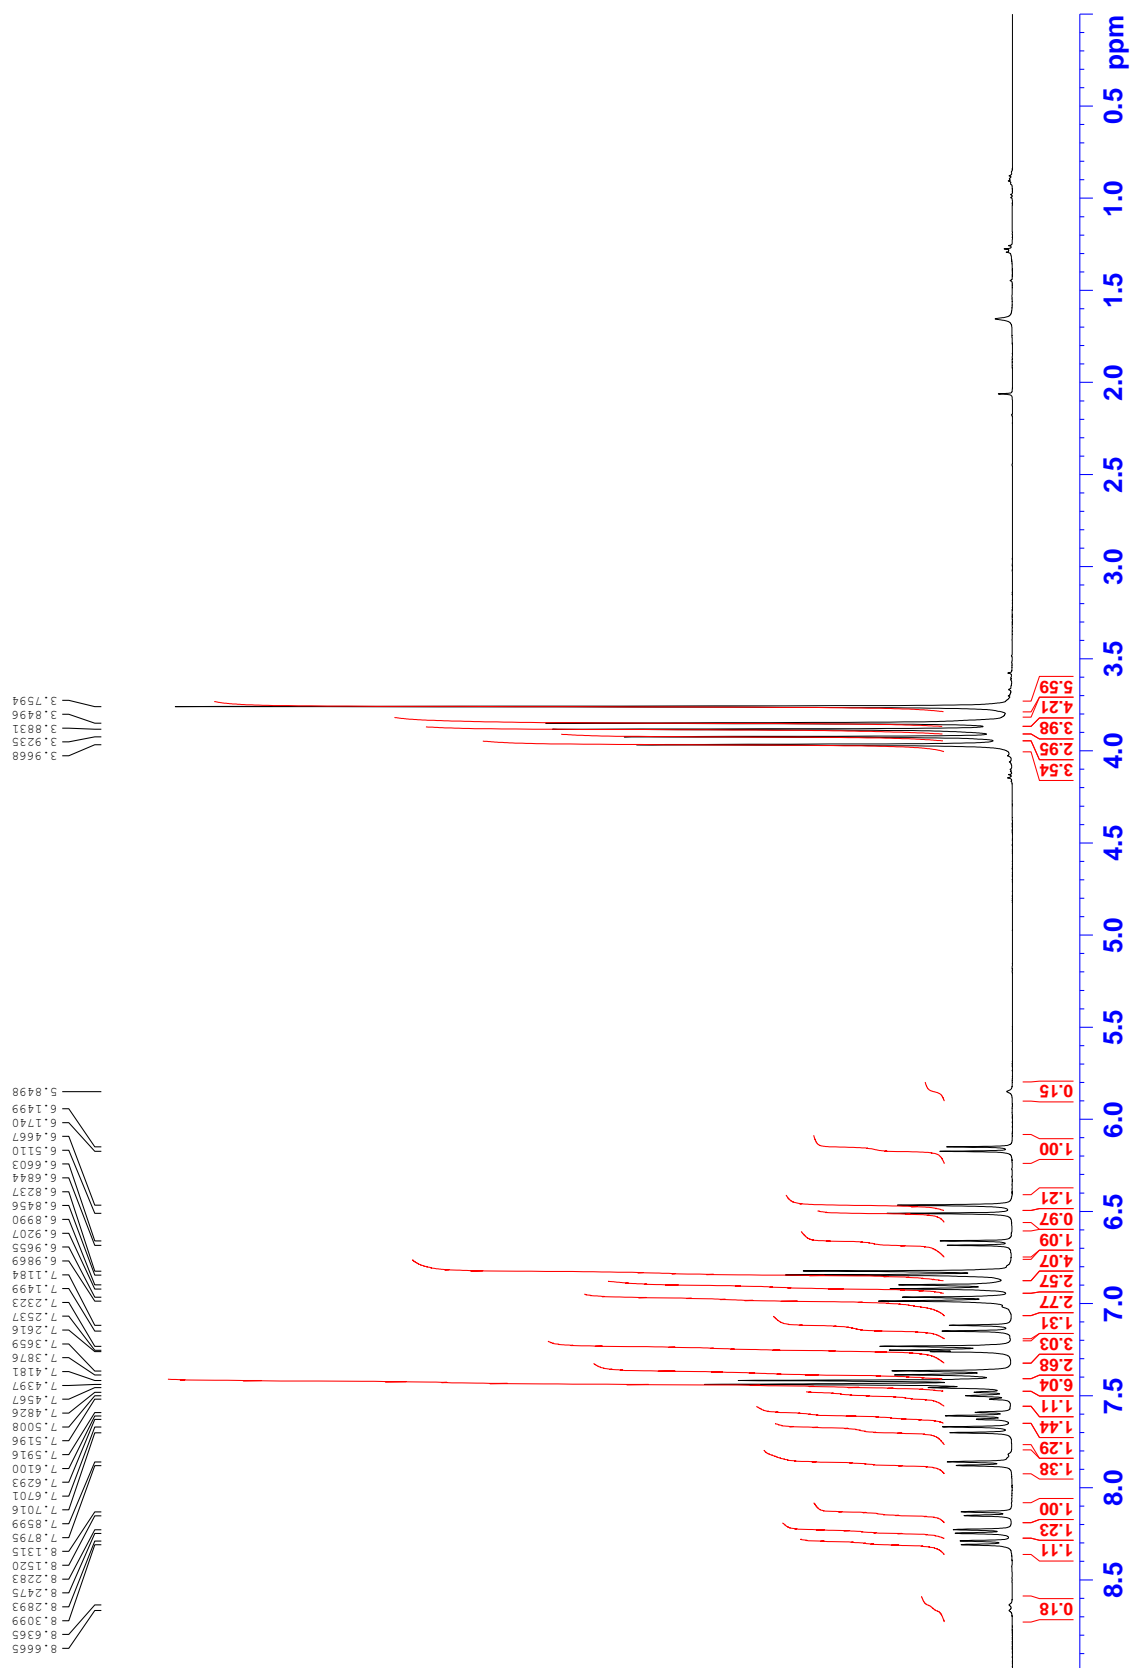

Figure S9  $^{13}\text{C}$  NMR spectrum of compound **9** in commercial  $\text{CDCl}_3$

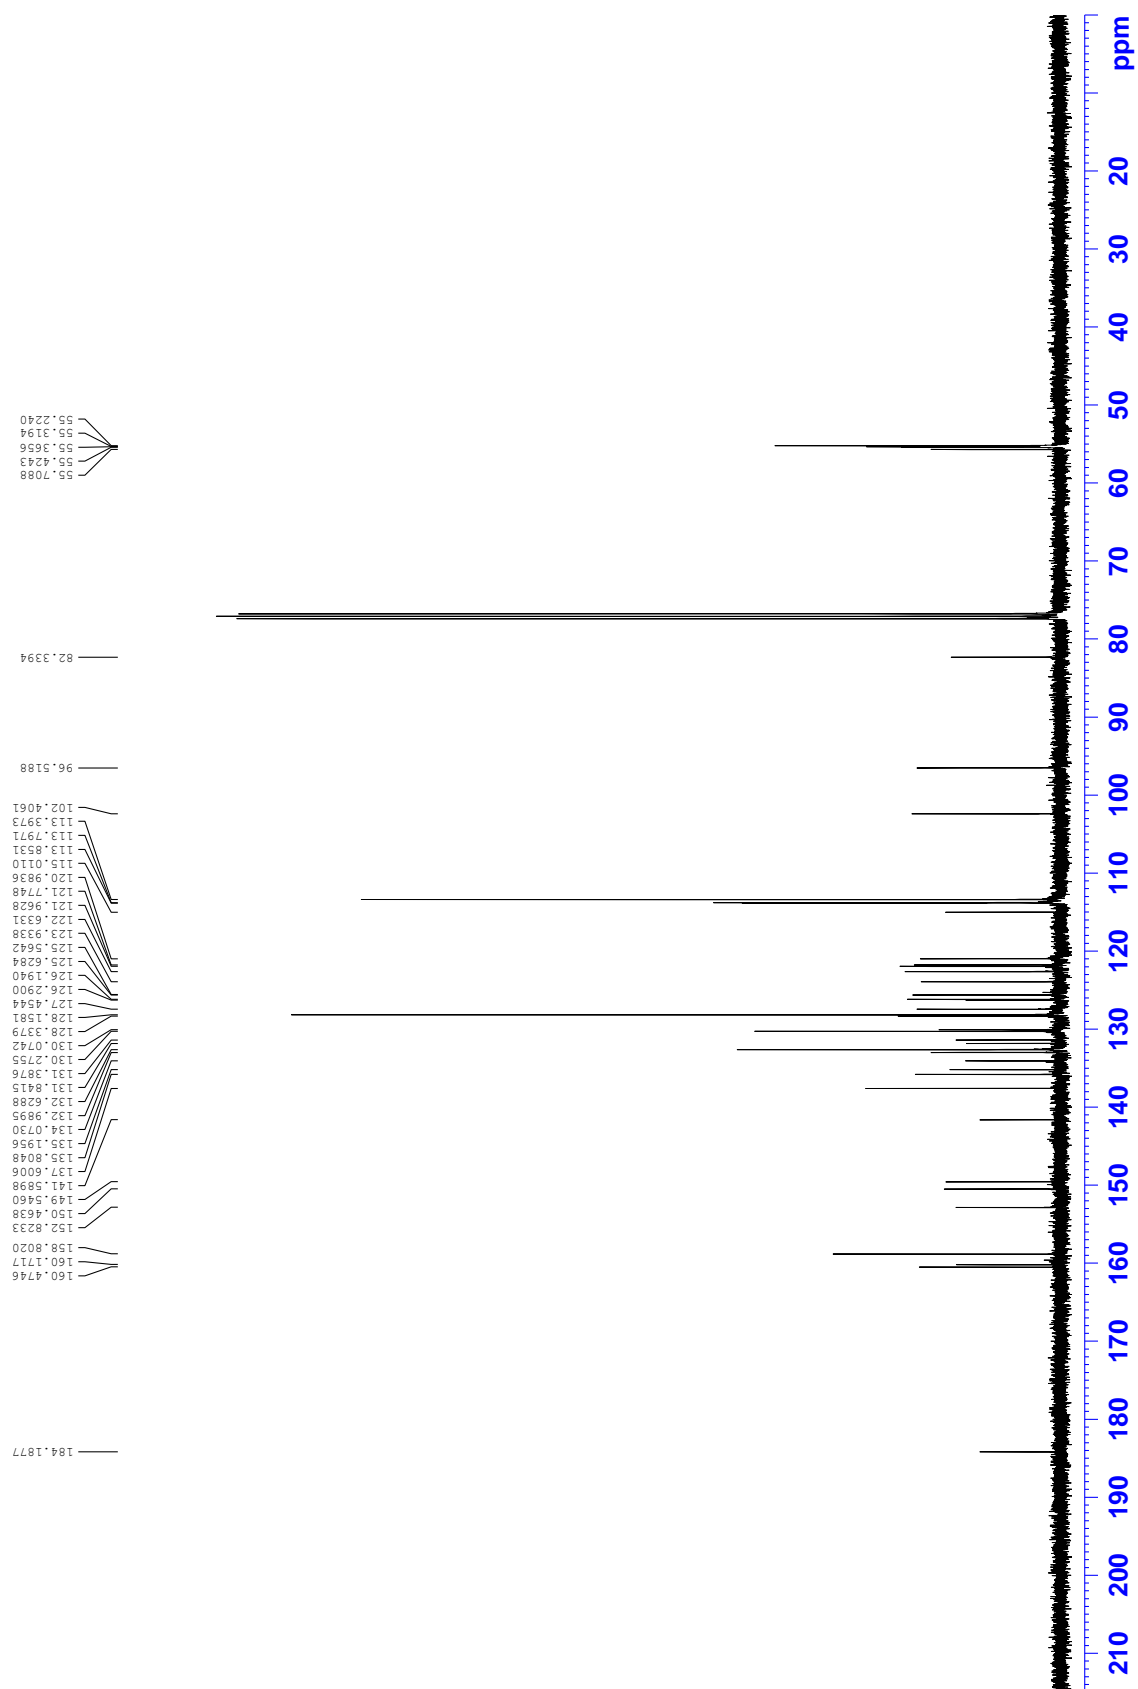

Figure S10  $^1\text{H}$  NMR spectrum of compound **9** in aq.  $\text{K}_2\text{CO}_3$  washed  $\text{CDCl}_3$

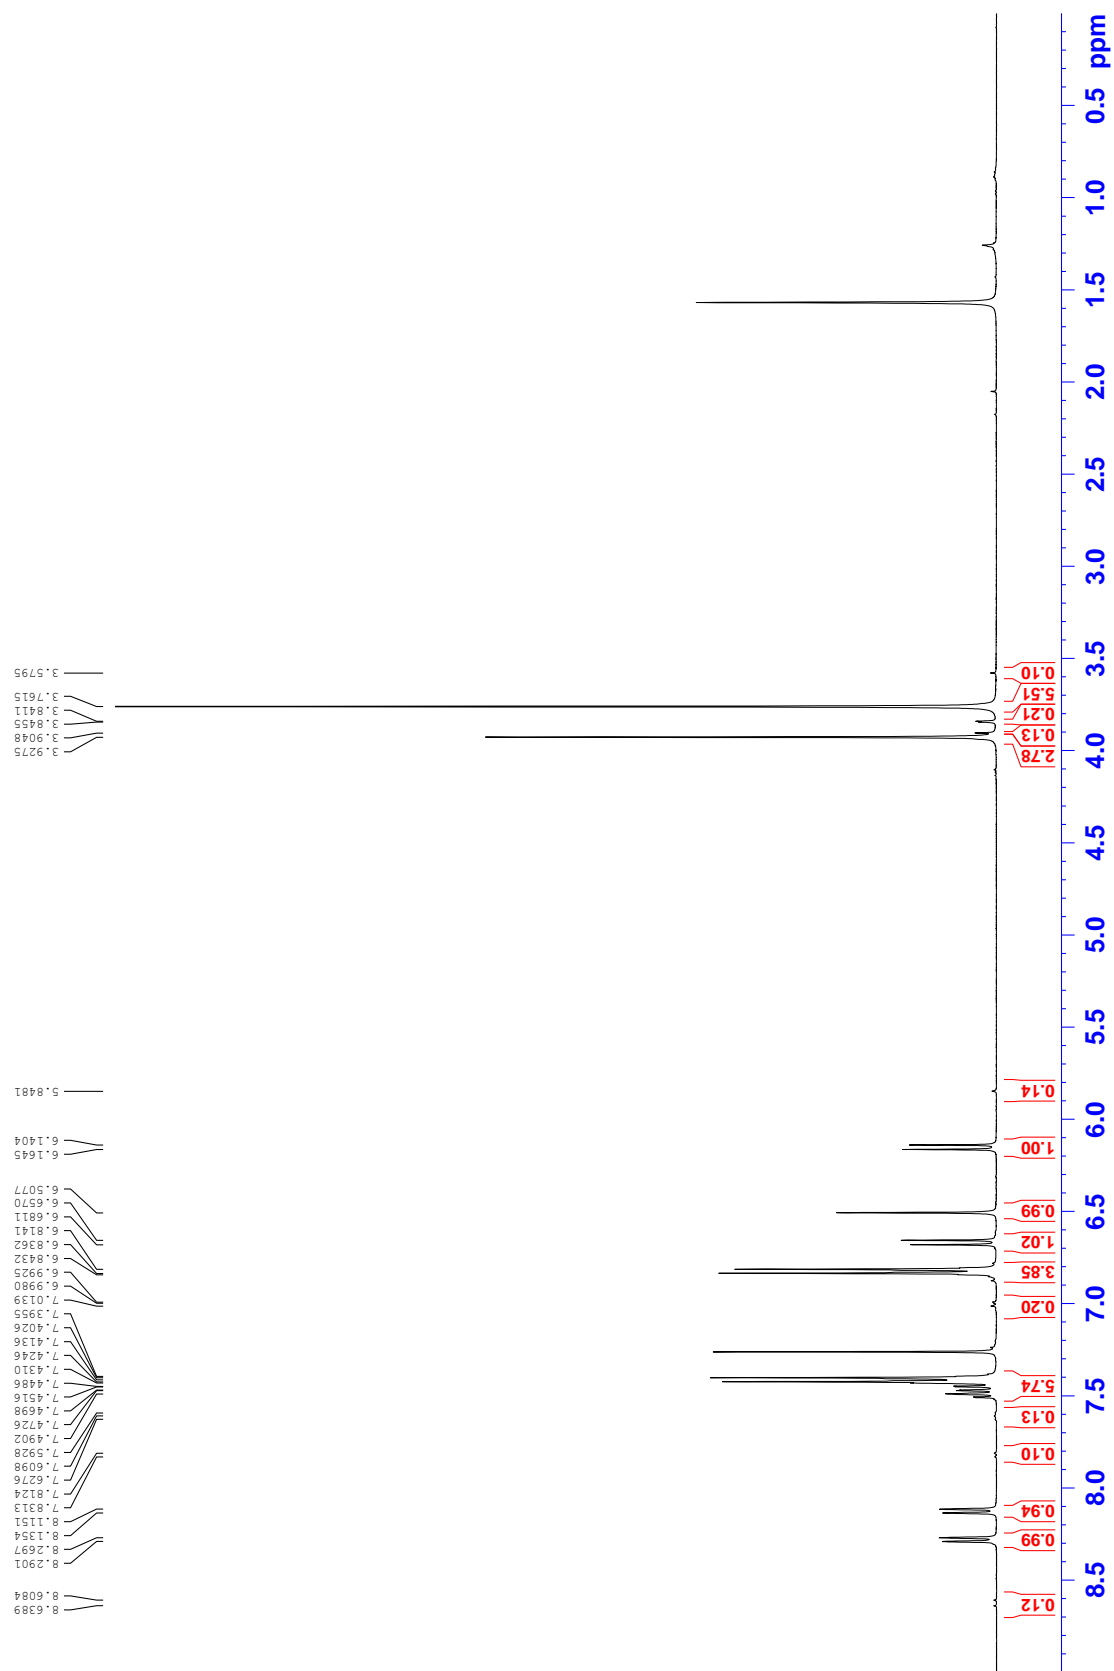

Figure S11  $^{13}\text{C}$  NMR spectrum of compound **9** in aq.  $\text{K}_2\text{CO}_3$  washed  $\text{CDCl}_3$

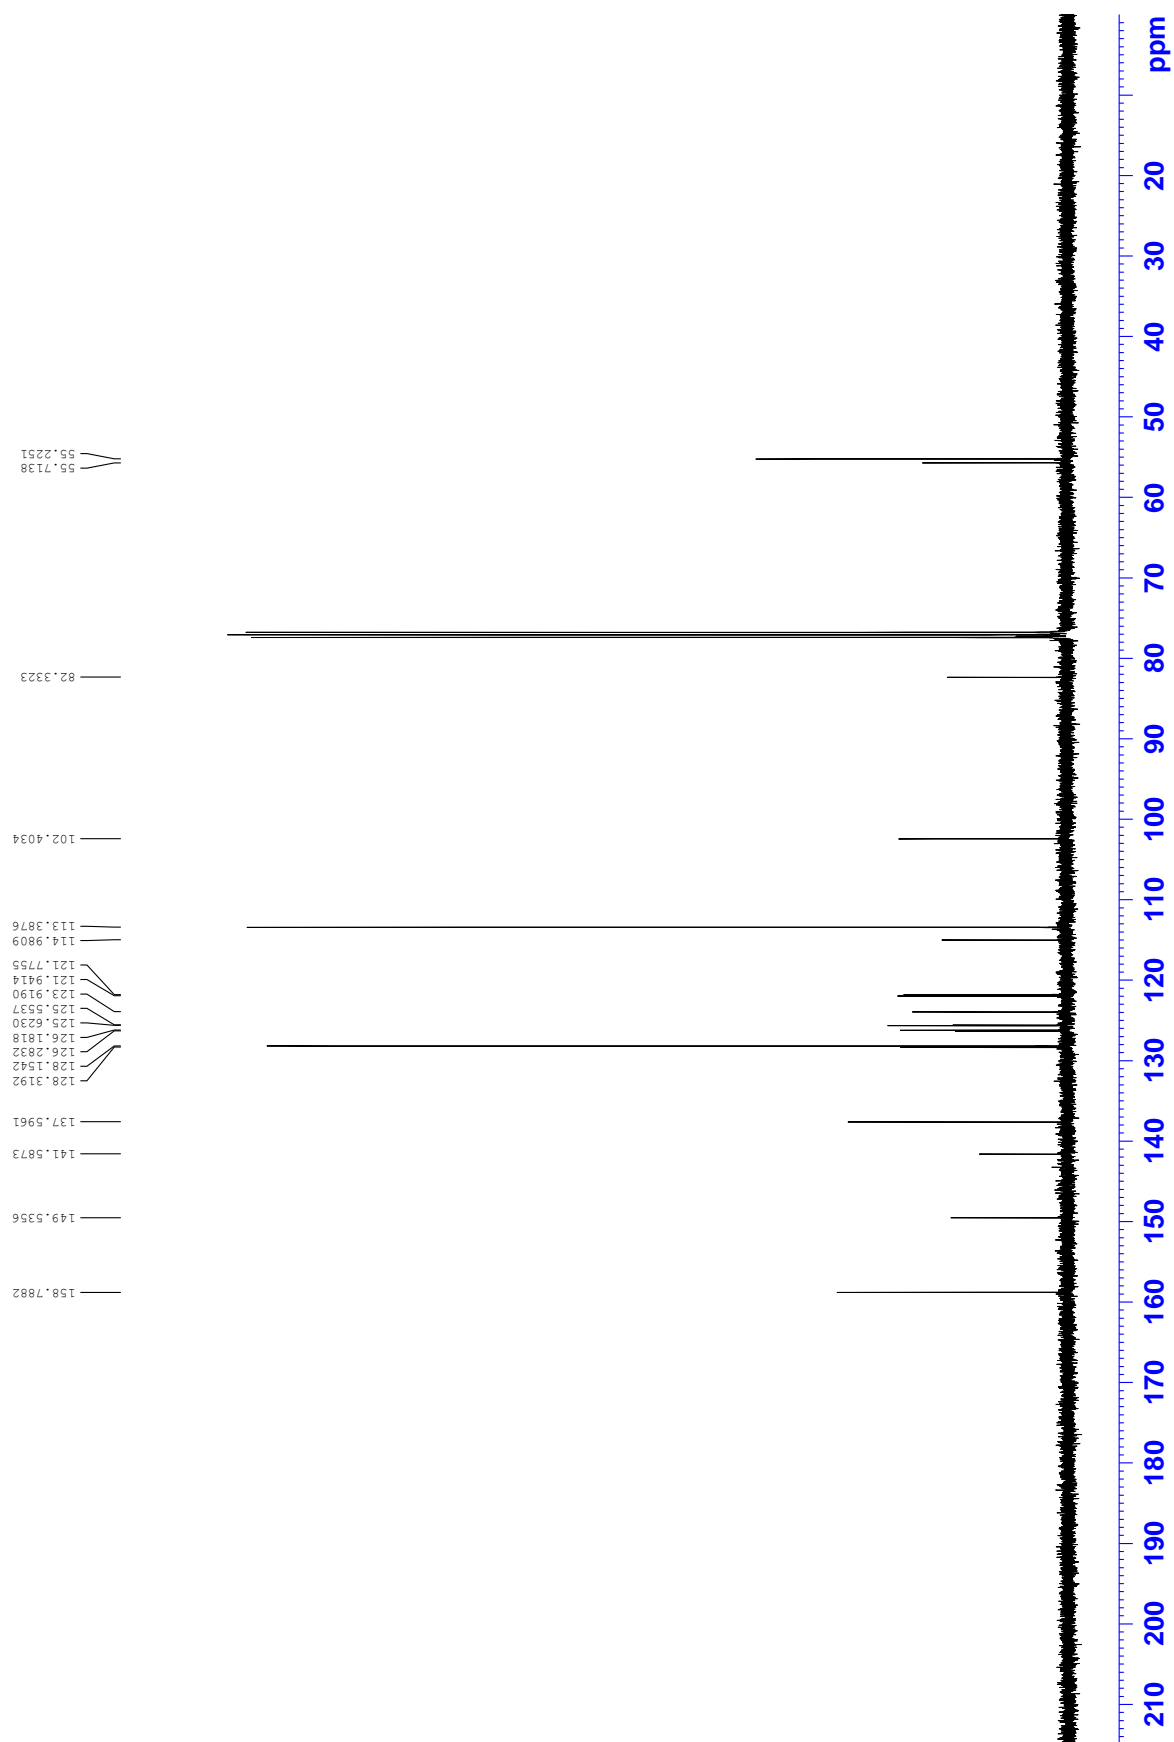



Figure S12 Mass Spectral data for compound 9

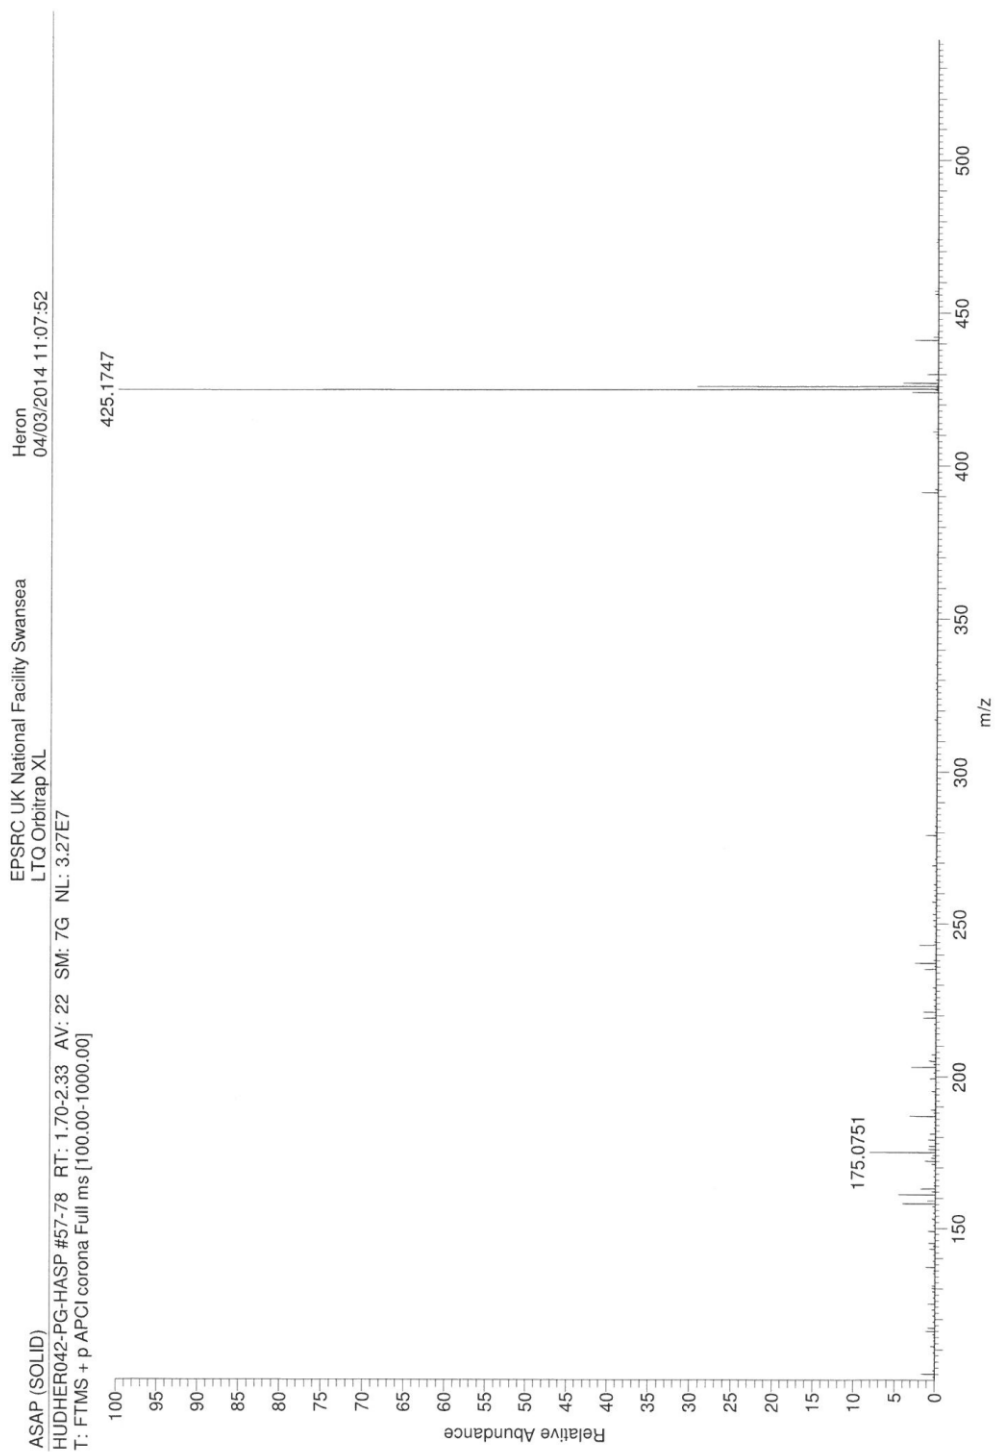

ASAP (SOLID)  
HUDHER042-PG-HASP #57-78 RT: 1.70-2.33 AV: 22 SM: 7G NL: 2.66E6  
T: FTMS + p APCI corona Full ms [100.00-1000.00]  
175.0751

EPSRC UK National Facility Swansea  
LTO Orbitrap XL

Heron  
04/03/2014 11:07:52

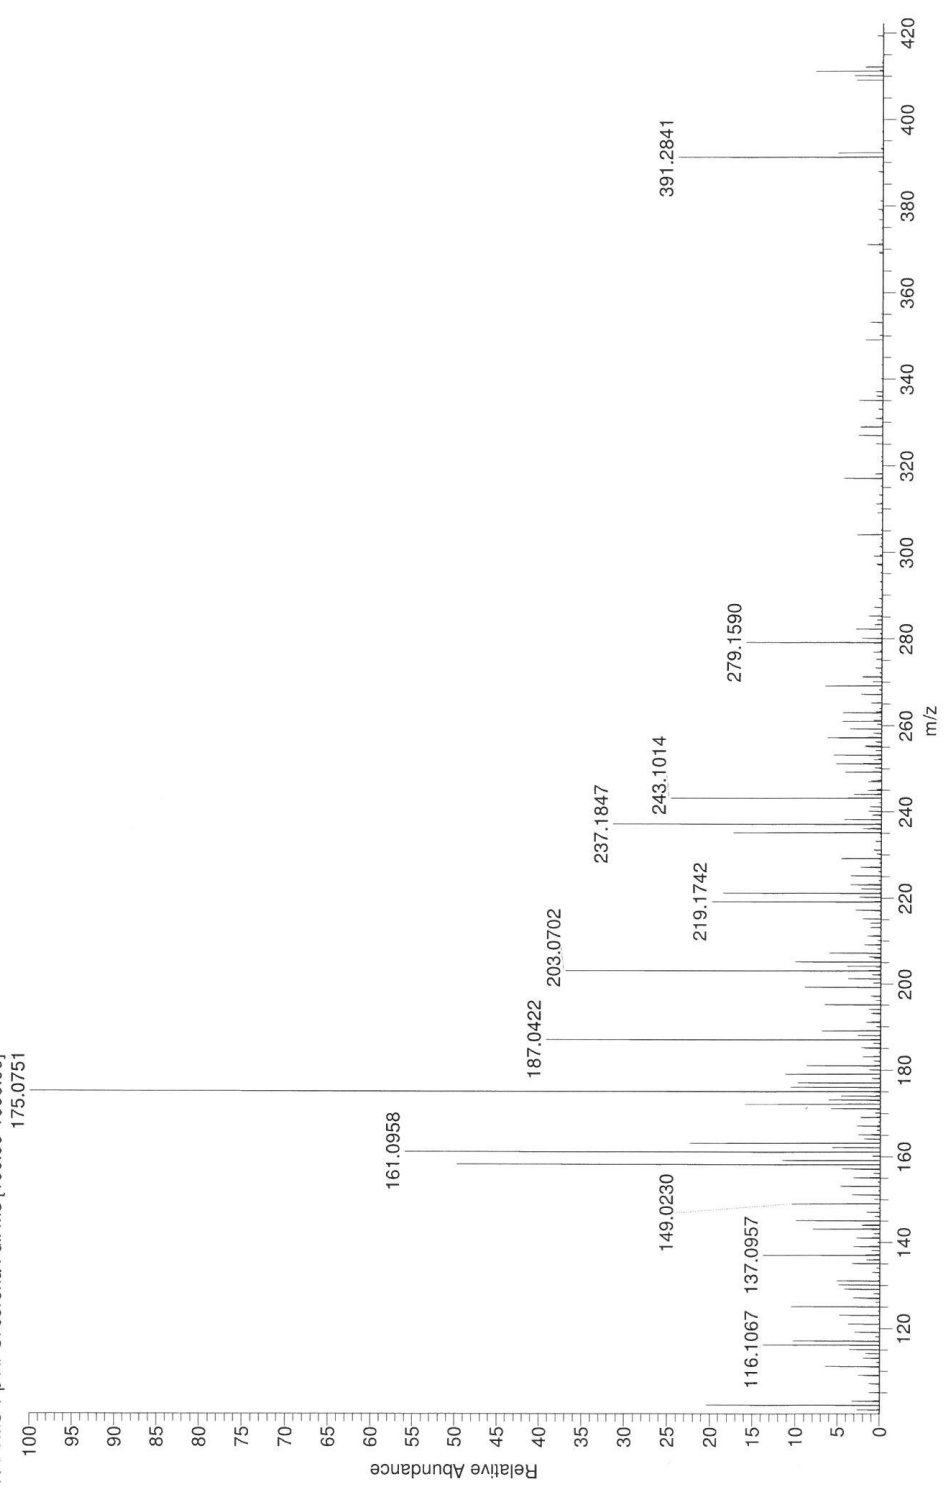

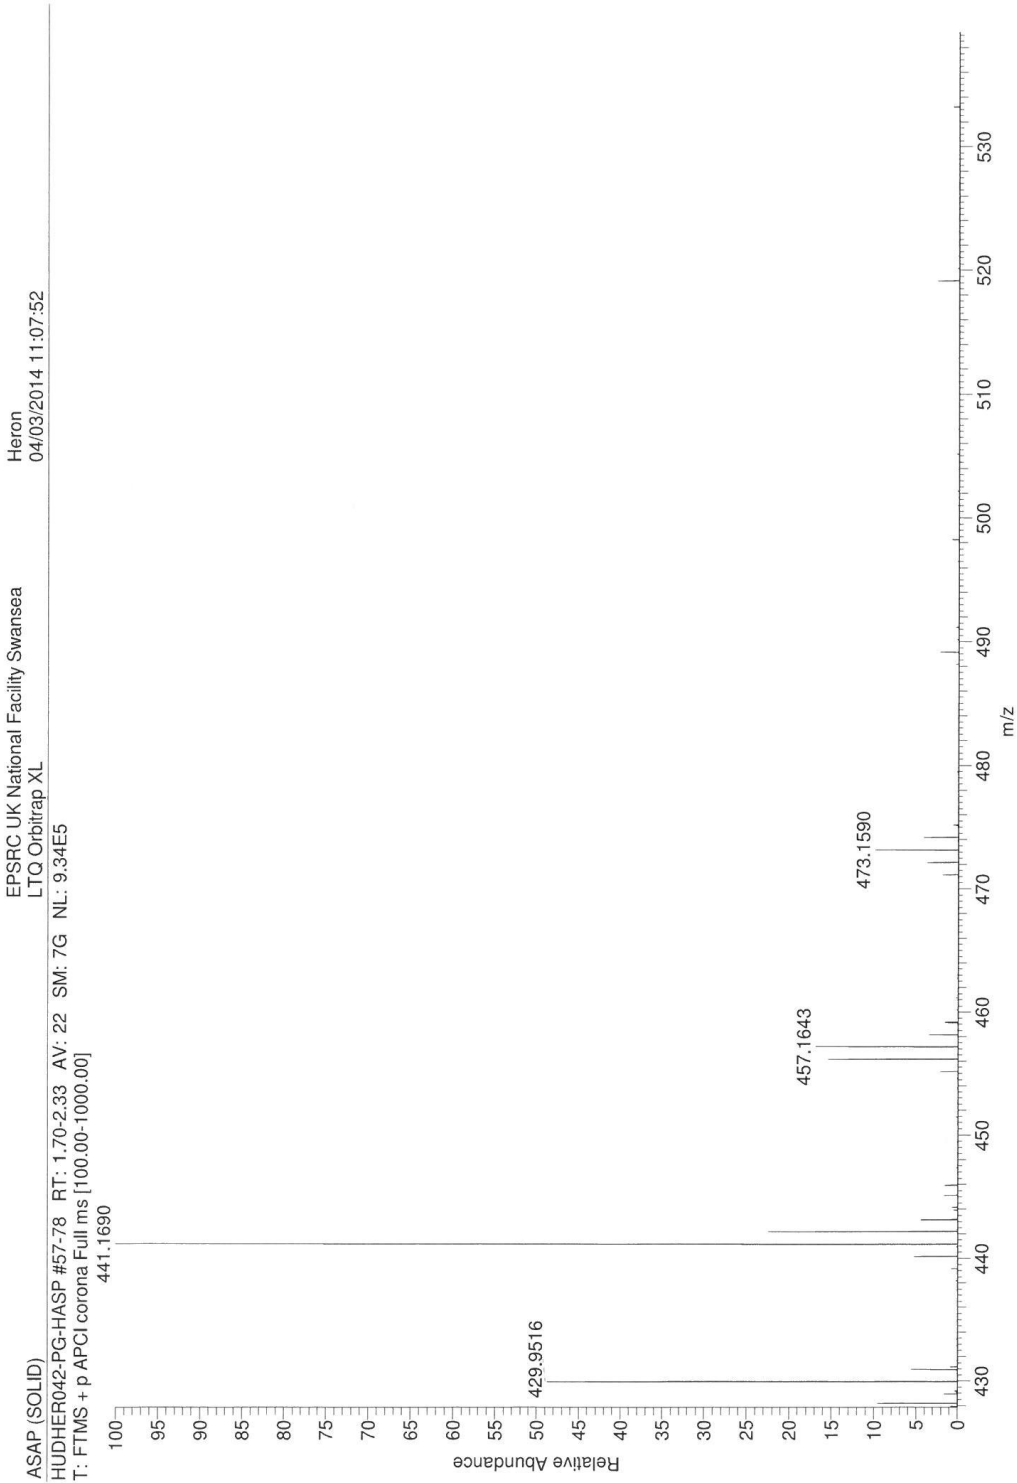

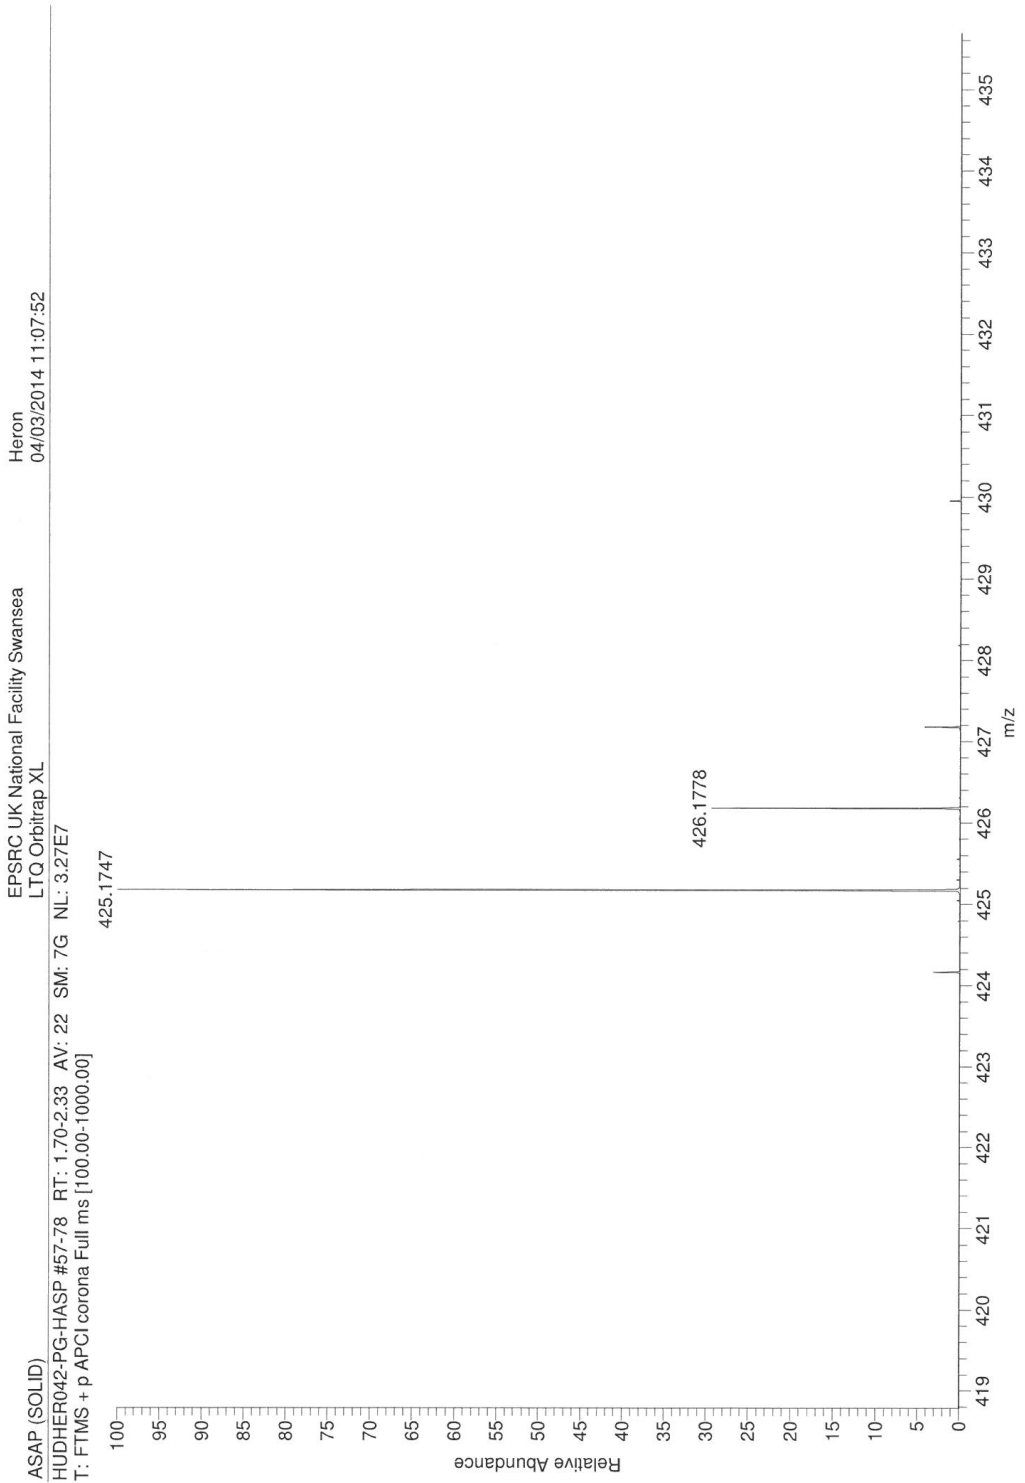

ASAP (SOLID)

NL:  
3.27E7  
HUDHER042-PG-HASP#57-78  
RT: 1.70-2.33 AV: 22 T:  
FTMS + p APCI corona Full ms  
[100.00-1000.00]

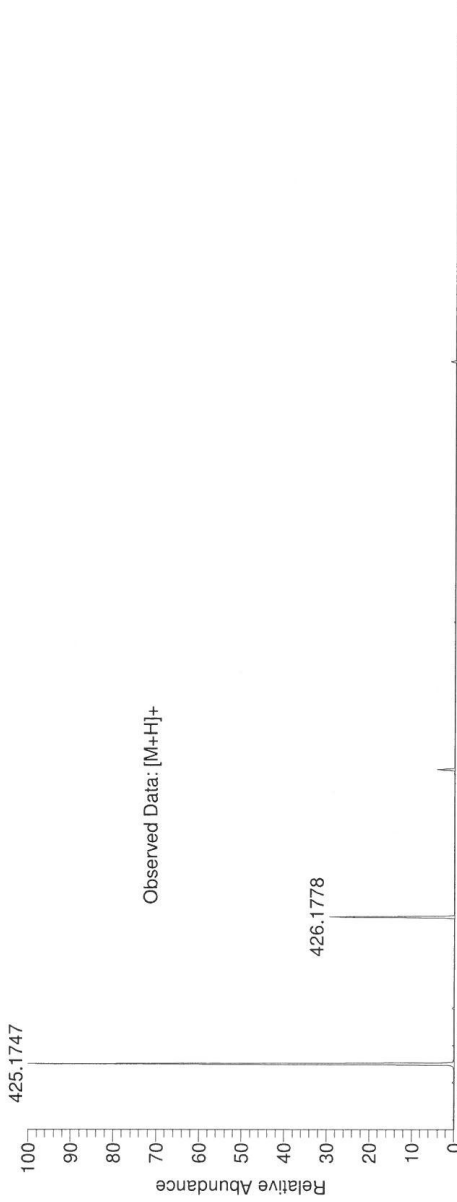

NL:  
1.71E4  
C<sub>28</sub>H<sub>24</sub>O<sub>4</sub>H:  
C<sub>28</sub>H<sub>25</sub>O<sub>4</sub>  
p (gss, s (p:40) Chrg 1  
R: 100000 Res.Pwr. @FWHM

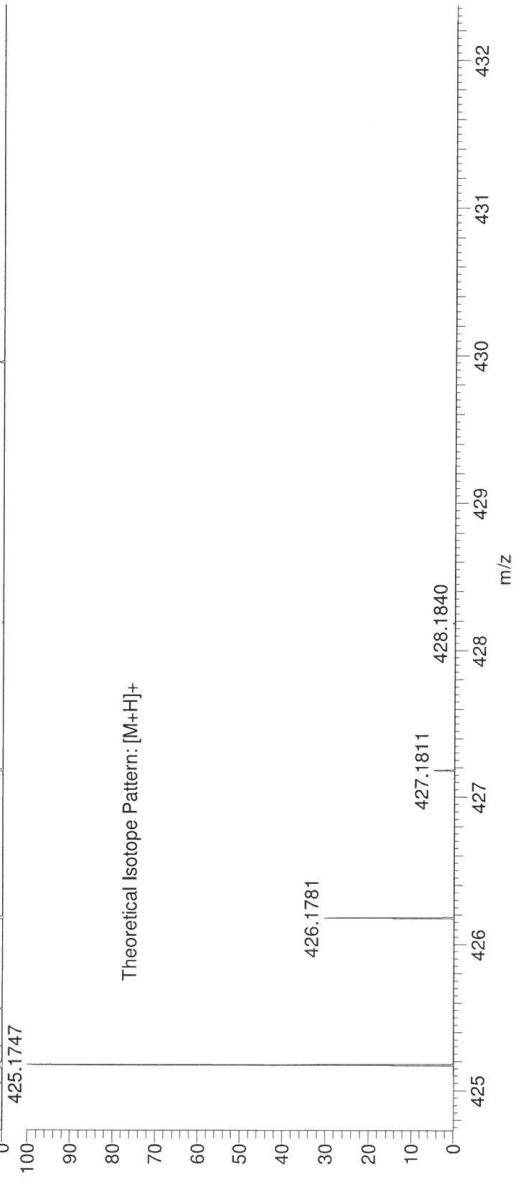

Isotope: Min. ... Max.  
 14 N 0 ... 15  
 16 O 0 ... 15  
 12 C 0 ... 60  
 1 H 0 ... 70  
 23 Na 0 ... 0  
 Tolerance Window: +- 5.00 ppm  
 Db/Ring Equiv: -3 ... 100  
 Fits: 100

N-Rule: Do not use  
 Charge: 1

| Mass     | Theoretical Mass | Delta [ppm] | RDB  | Composition                                                    |
|----------|------------------|-------------|------|----------------------------------------------------------------|
| 425.1747 | 425.1747         | -0.1        | 16.5 | C <sub>4</sub> H <sub>25</sub> O                               |
| 425.1752 | 425.1752         | -1.3        | 9.5  | C <sub>4</sub> H <sub>21</sub> O <sub>2</sub> N <sub>12</sub>  |
| 425.1752 | 425.1752         | -1.3        | 4.0  | C <sub>4</sub> H <sub>27</sub> O <sub>10</sub> N <sub>5</sub>  |
| 425.1739 | 425.1739         | 1.9         | -1.0 | C <sub>4</sub> H <sub>31</sub> O <sub>4</sub> N <sub>1</sub>   |
| 425.1739 | 425.1739         | 1.9         | 4.5  | C <sub>4</sub> H <sub>25</sub> O <sub>3</sub> N <sub>8</sub>   |
| 425.1734 | 425.1734         | 3.1         | 10.0 | C <sub>4</sub> H <sub>19</sub> O <sub>4</sub> N <sub>15</sub>  |
| 425.1761 | 425.1761         | -3.2        | 17.0 | C <sub>4</sub> H <sub>23</sub> O <sub>4</sub> N <sub>3</sub>   |
| 425.1766 | 425.1766         | -4.4        | 21.5 | C <sub>4</sub> H <sub>21</sub> N <sub>1</sub>                  |
| 425.1766 | 425.1766         | -4.4        | 9.0  | C <sub>4</sub> H <sub>23</sub> O <sub>4</sub> N <sub>2</sub>   |
| 425.1766 | 425.1766         | -4.4        | 3.5  | C <sub>18</sub> H <sub>29</sub> O <sub>11</sub> N <sub>2</sub> |

Figure S13  $^1\text{H}$  NMR spectrum of compound **10** in  $\text{d}_6$ -acetone

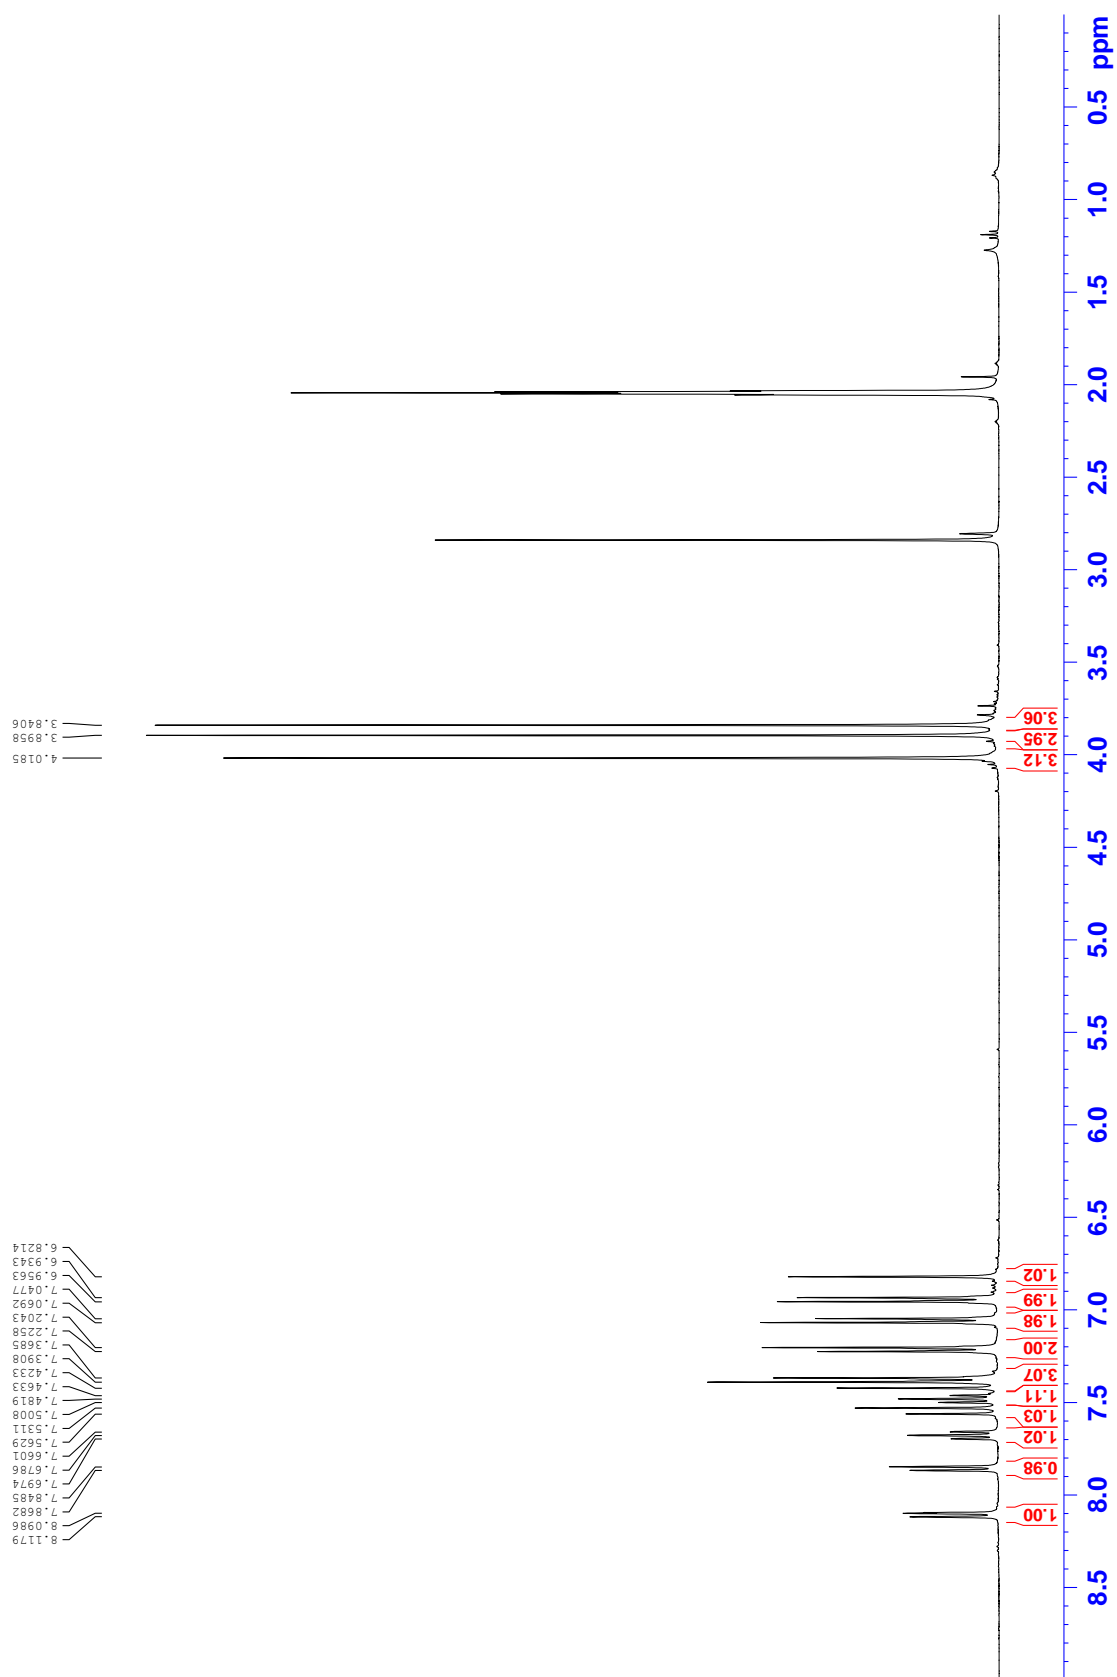

Figure S14  $^{13}\text{C}$  NMR spectrum of compound **10** in  $\text{d}_6$ -acetone

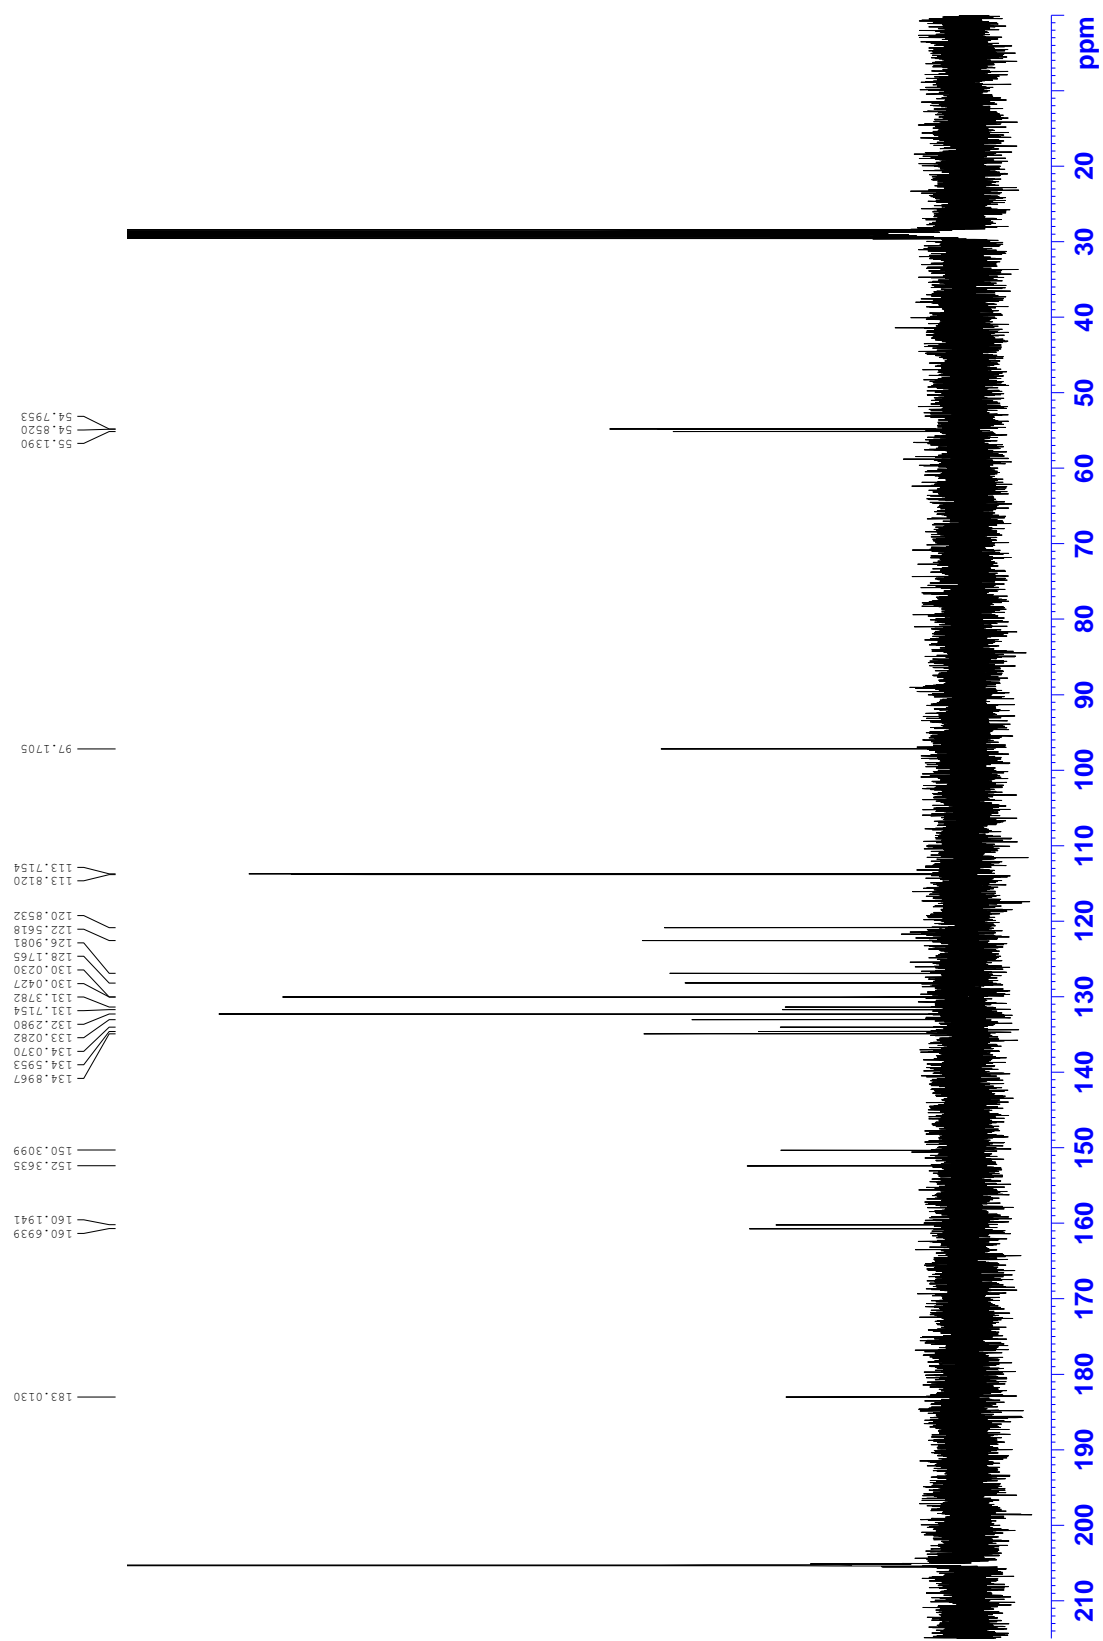



Figure S15 HSQC spectrum of compound **10** in  $d_6$ -acetone

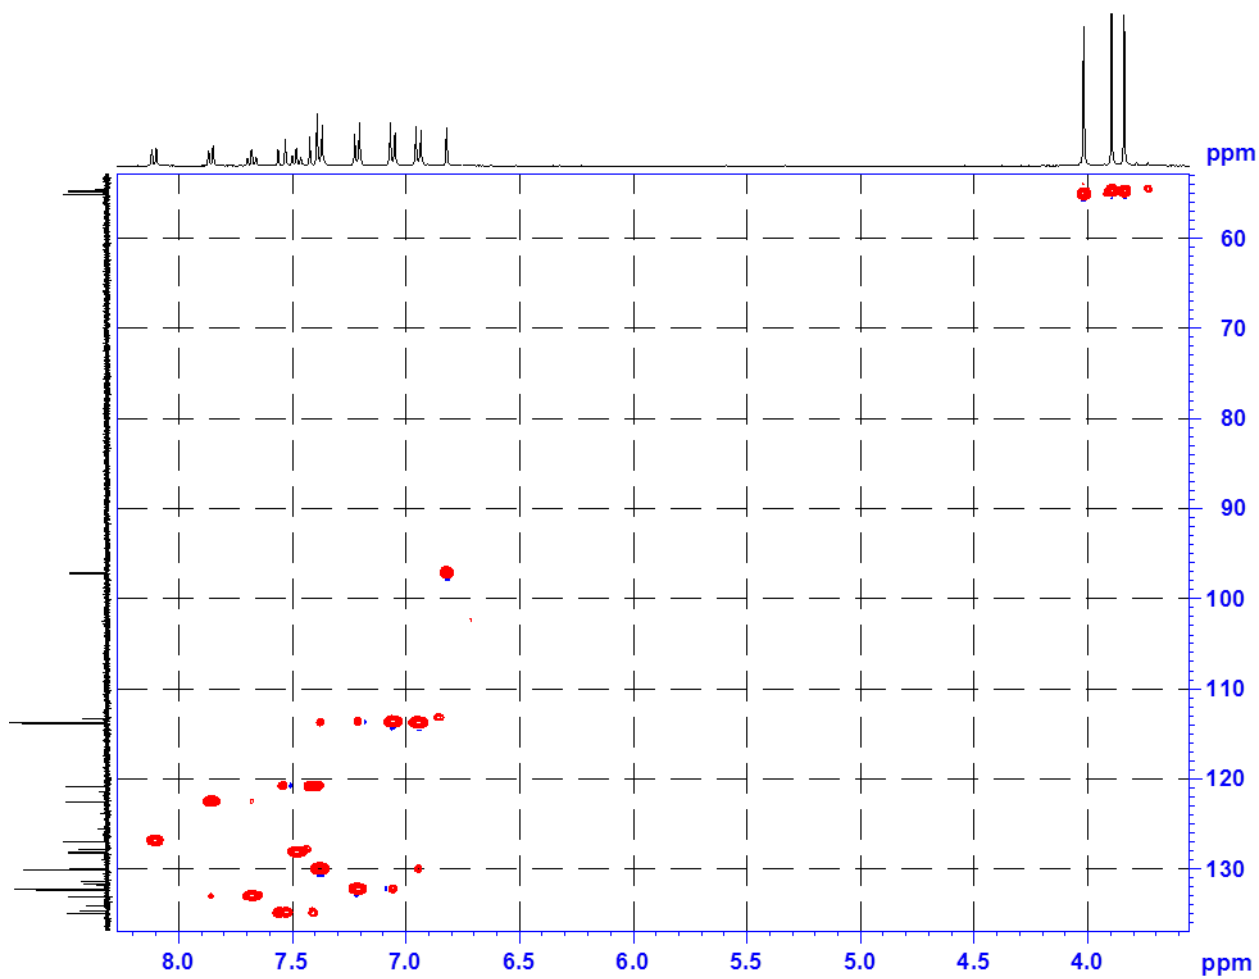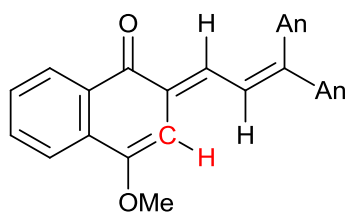

One bond correlation between **H** at  $\delta$  6.82 and **C** at  $\delta$  97.17

Figure S16 HMBC spectrum of compound **10** in  $d_6$ -acetone

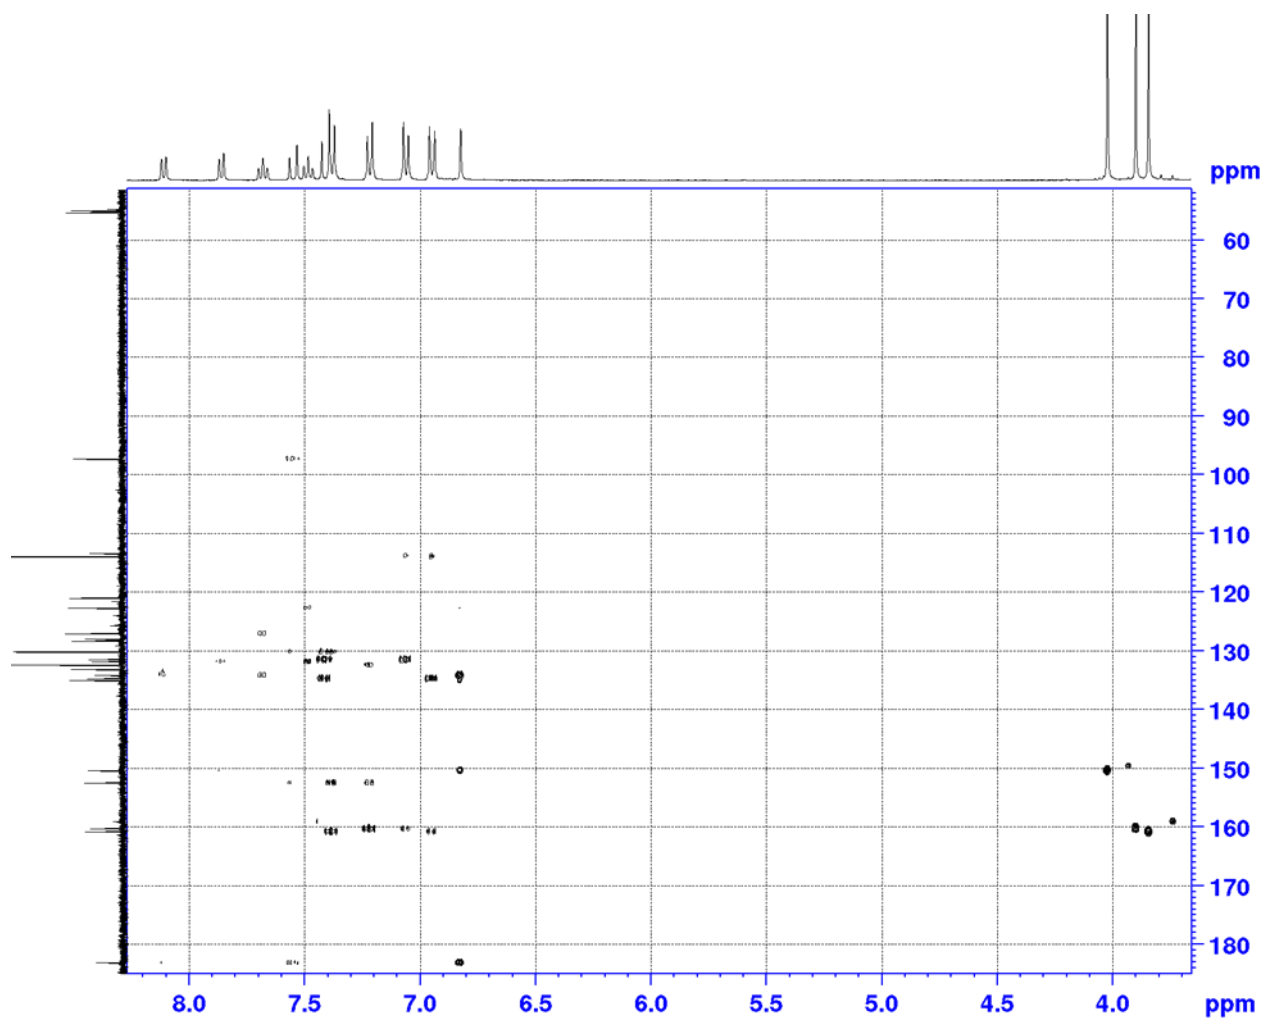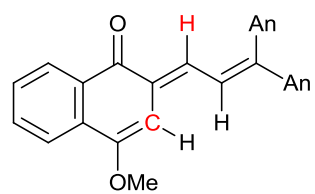

Three bond correlation between **H** at  $\delta$  7.55 and **C** at  $\delta$  97.17

Figure S17 COSY spectrum of compound **10** in d<sub>6</sub>-acetone (aromatic region)

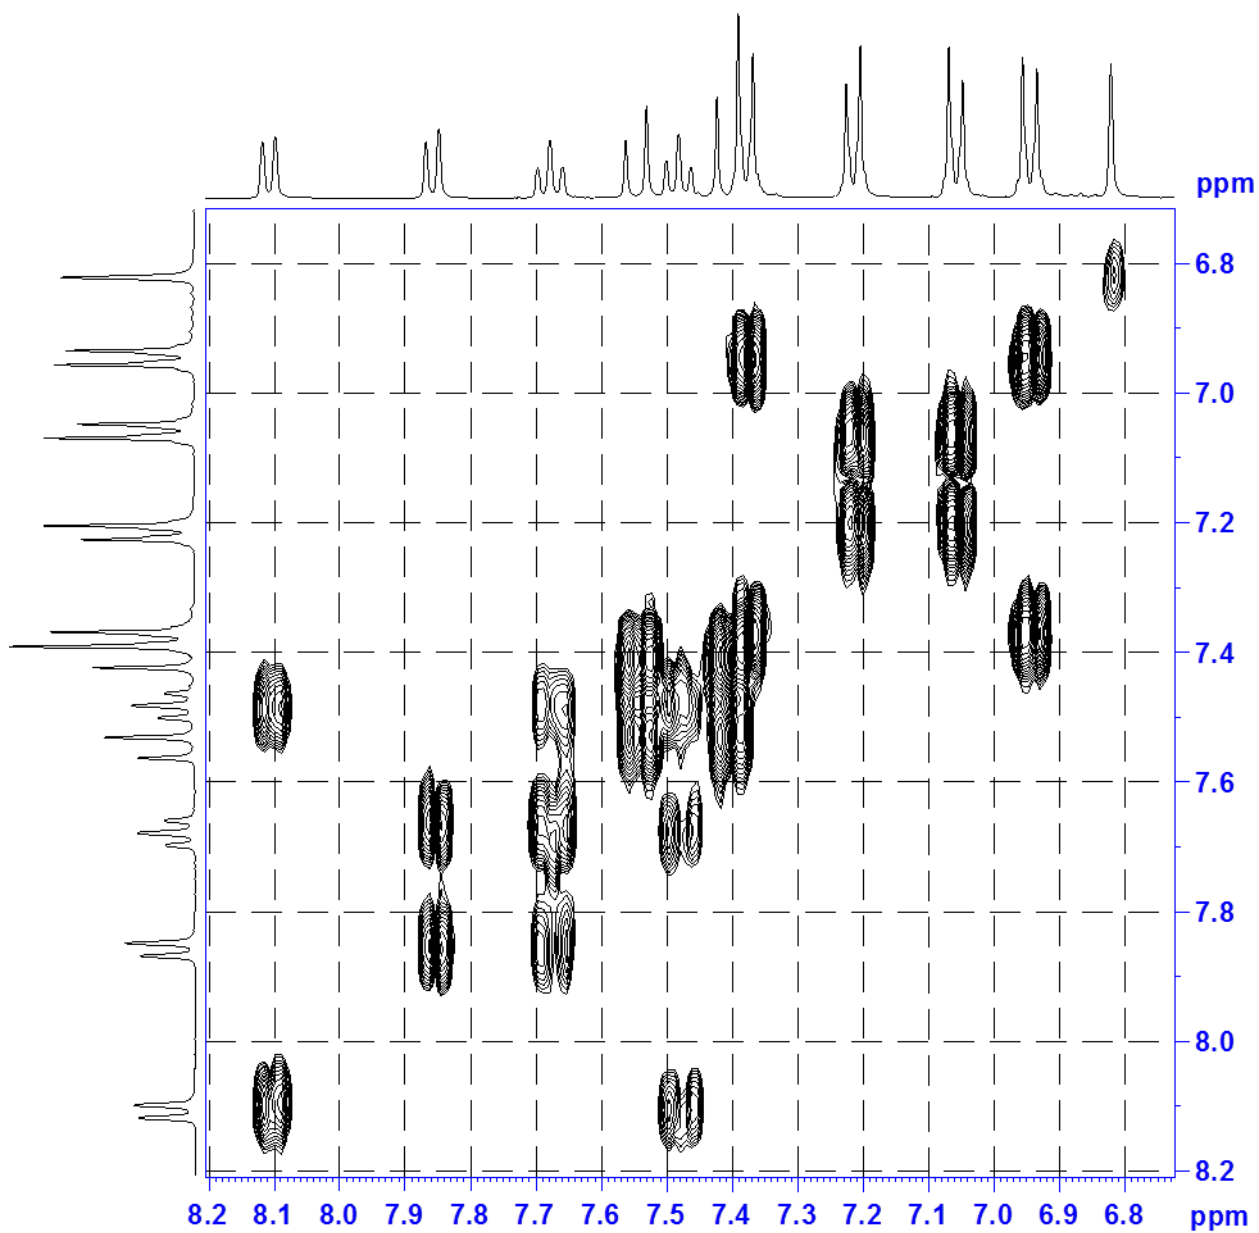

Figure S18 NOE spectrum of compound **10** in  $d_6$ -acetone

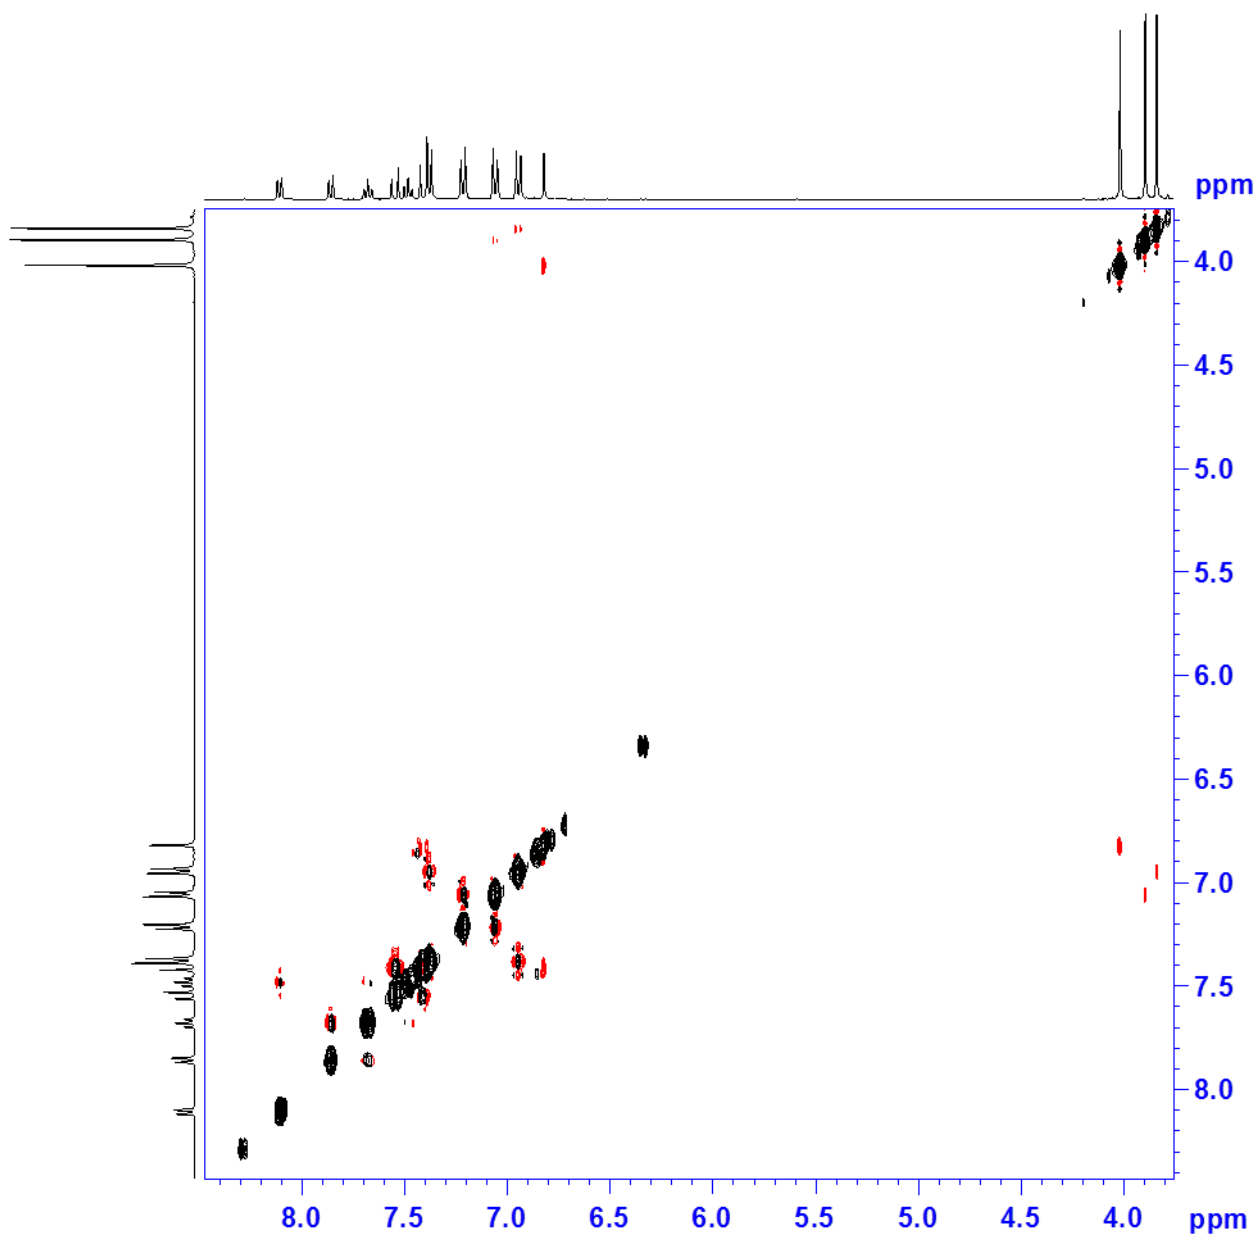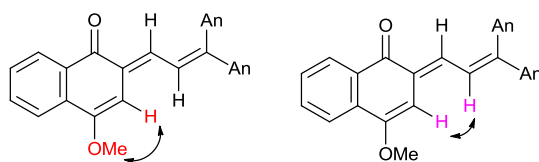

Weak correlation between **H** at  $\delta$  6.82 and **OMe** at  $\delta$  4.02

Weak correlation between **H** at  $\delta$  6.82 and **H** at  $\delta$  7.44

Figure S19 Mass Spectral data for compound **10**

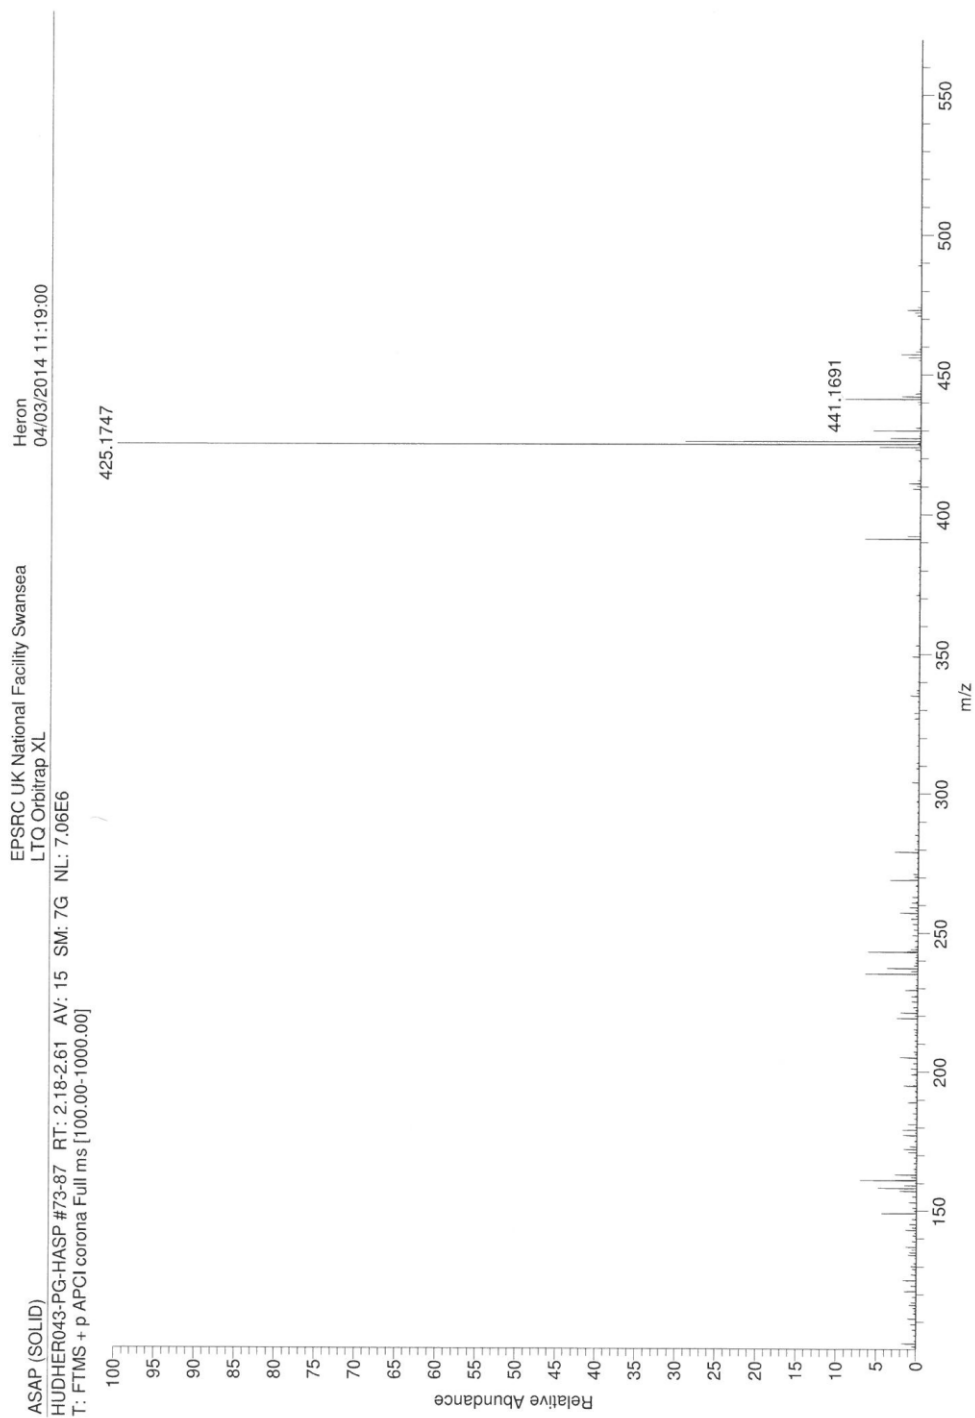

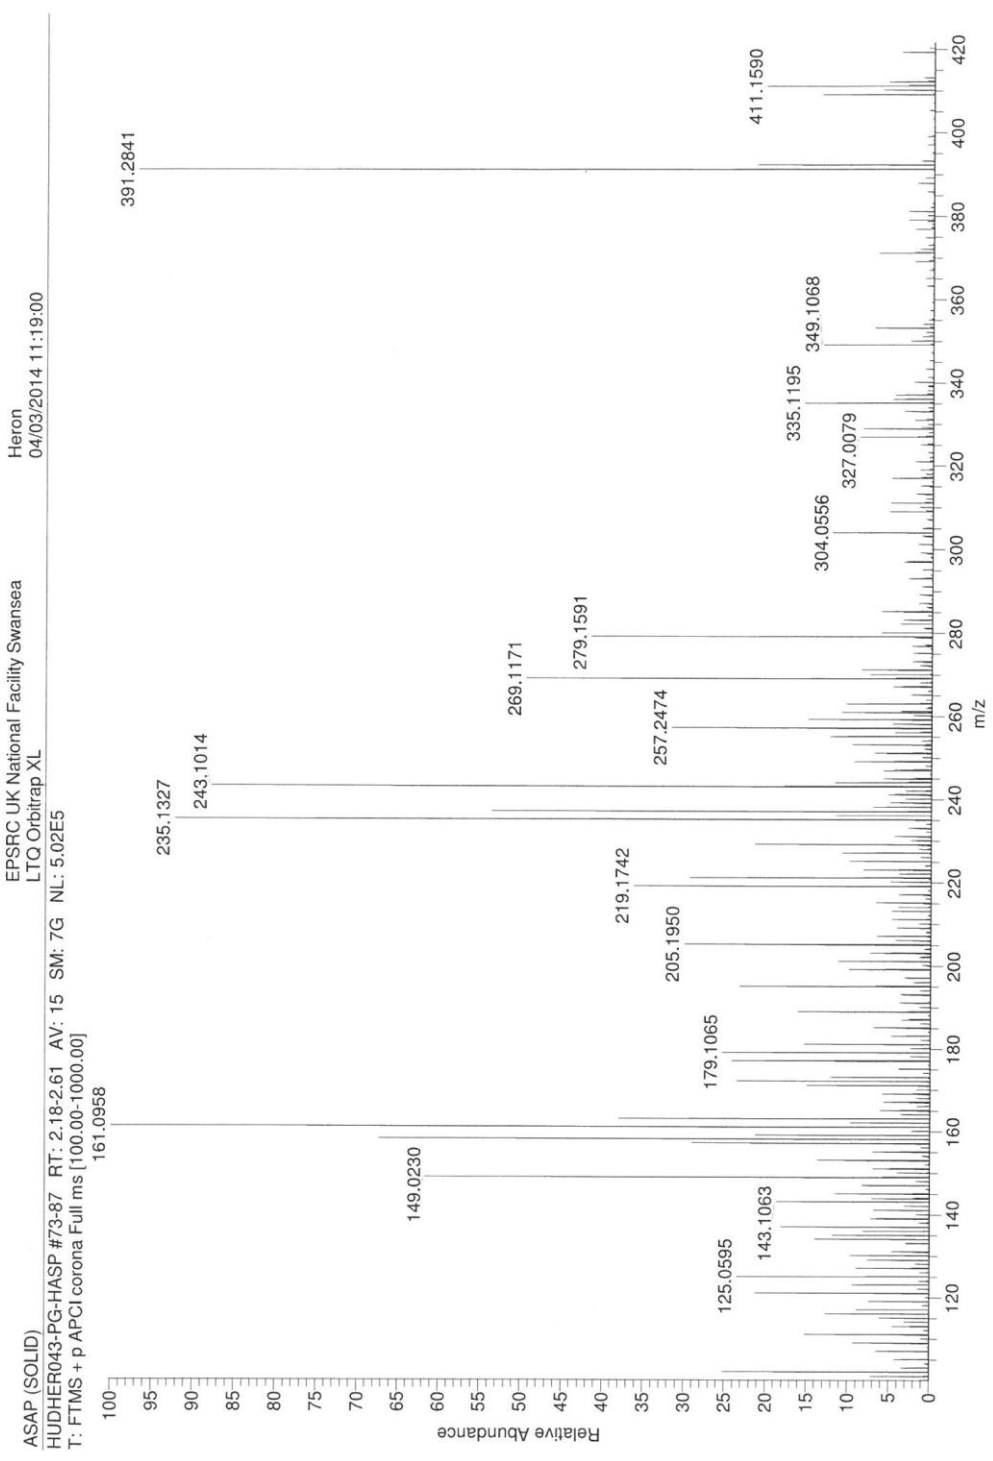

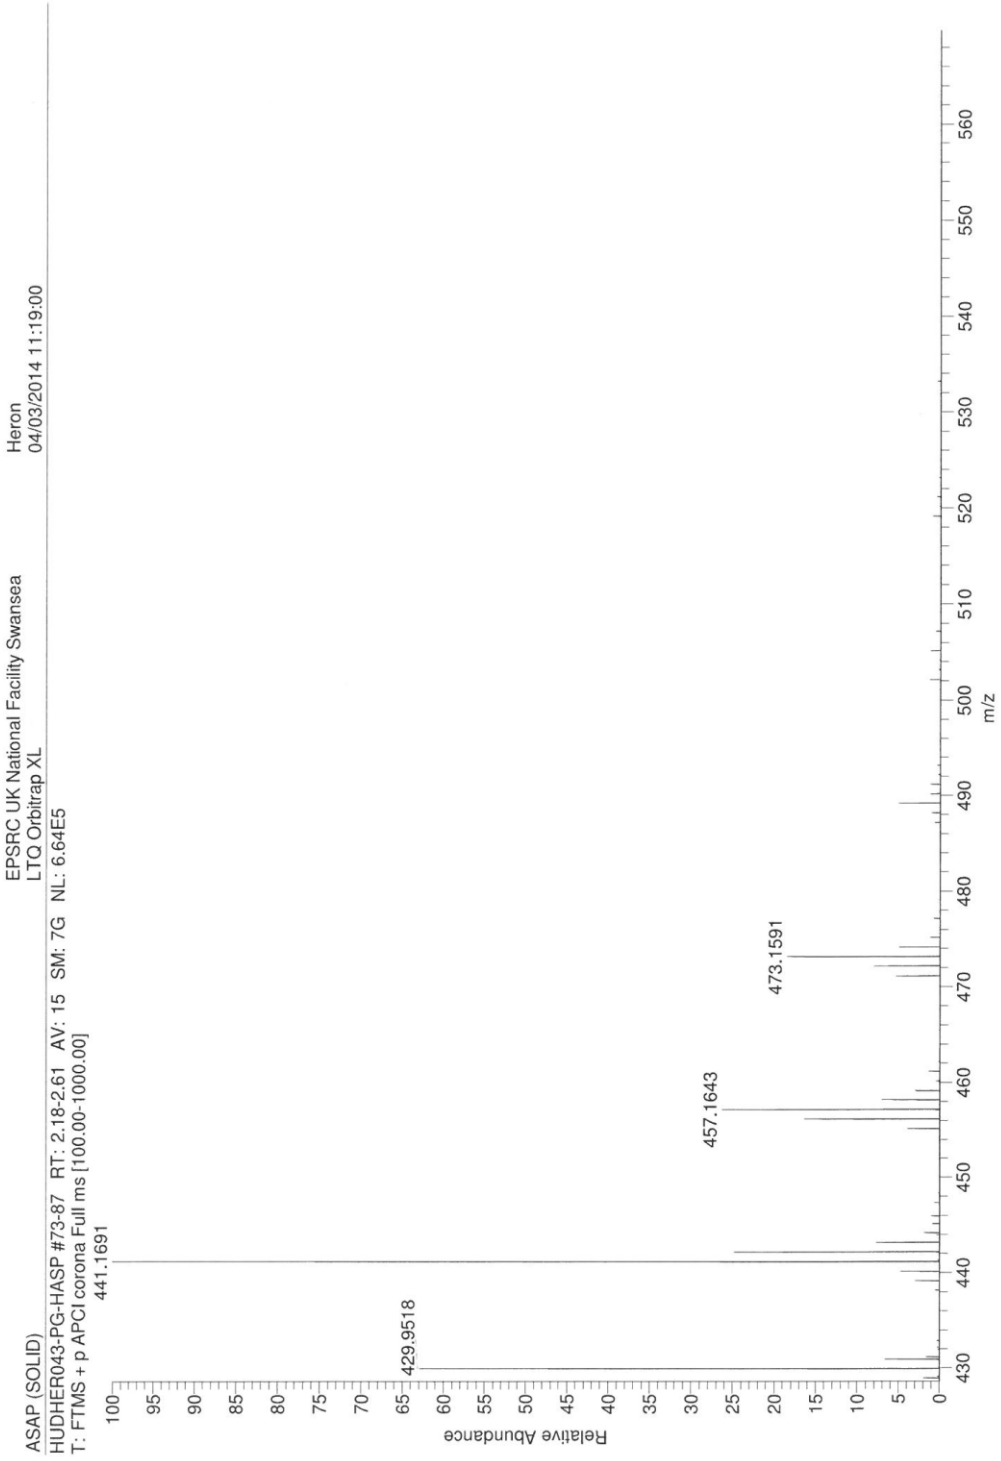

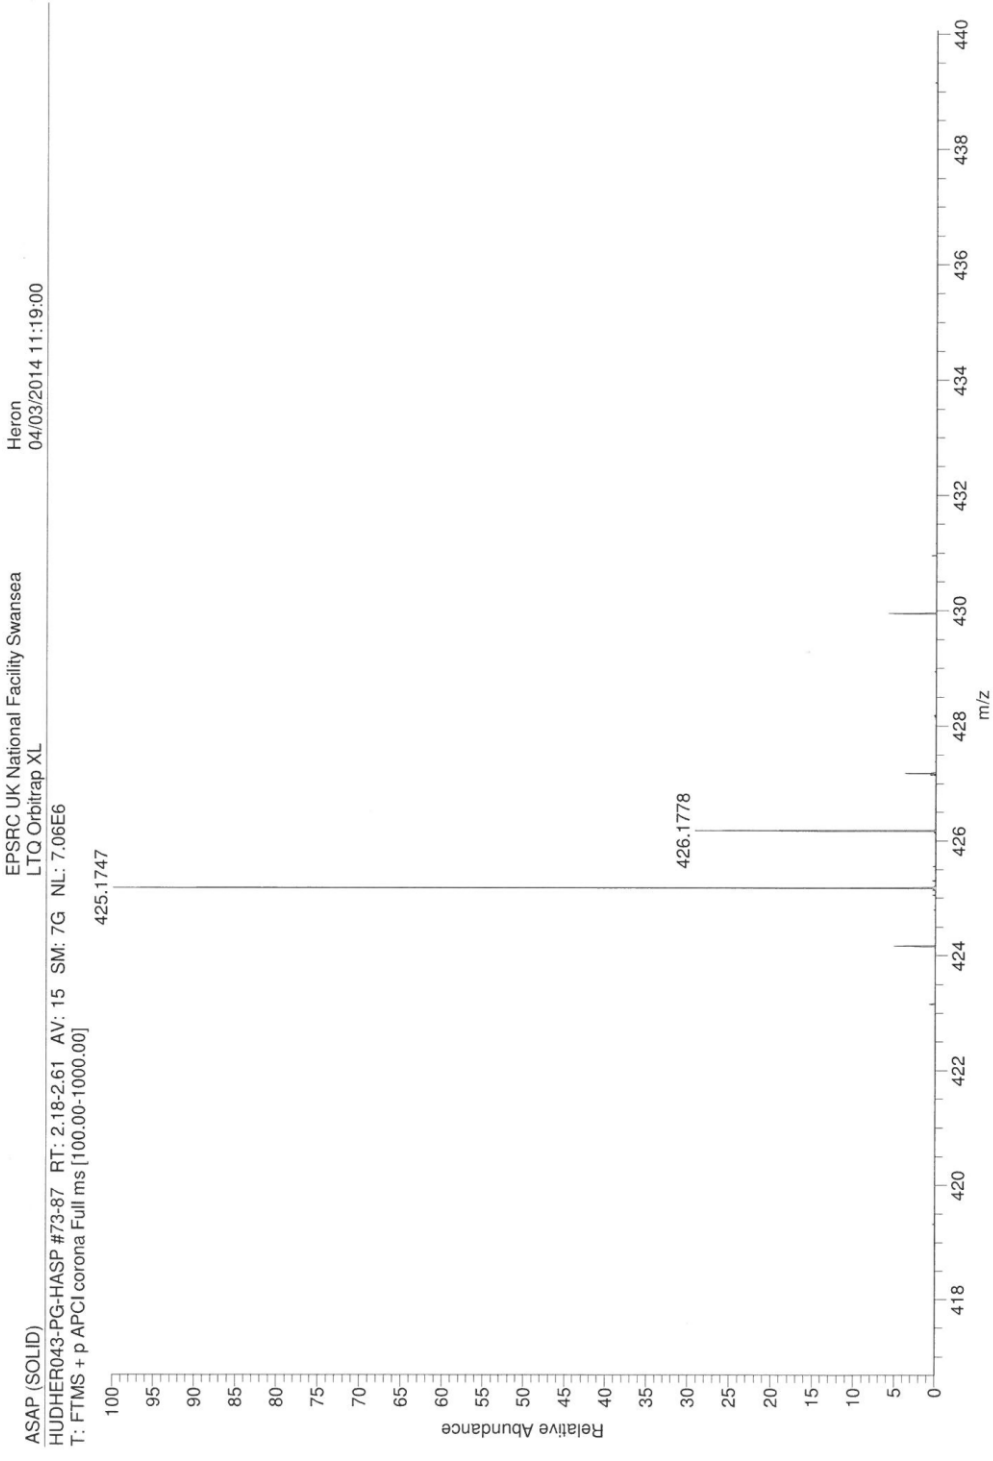



NL:  
7.06E6  
HUDHER043-PG-HASF#73-87  
RT: 2.18-2.61 AV: 15 T:  
FTMS + p APC|corona Full ms  
[100.00-1000.00]

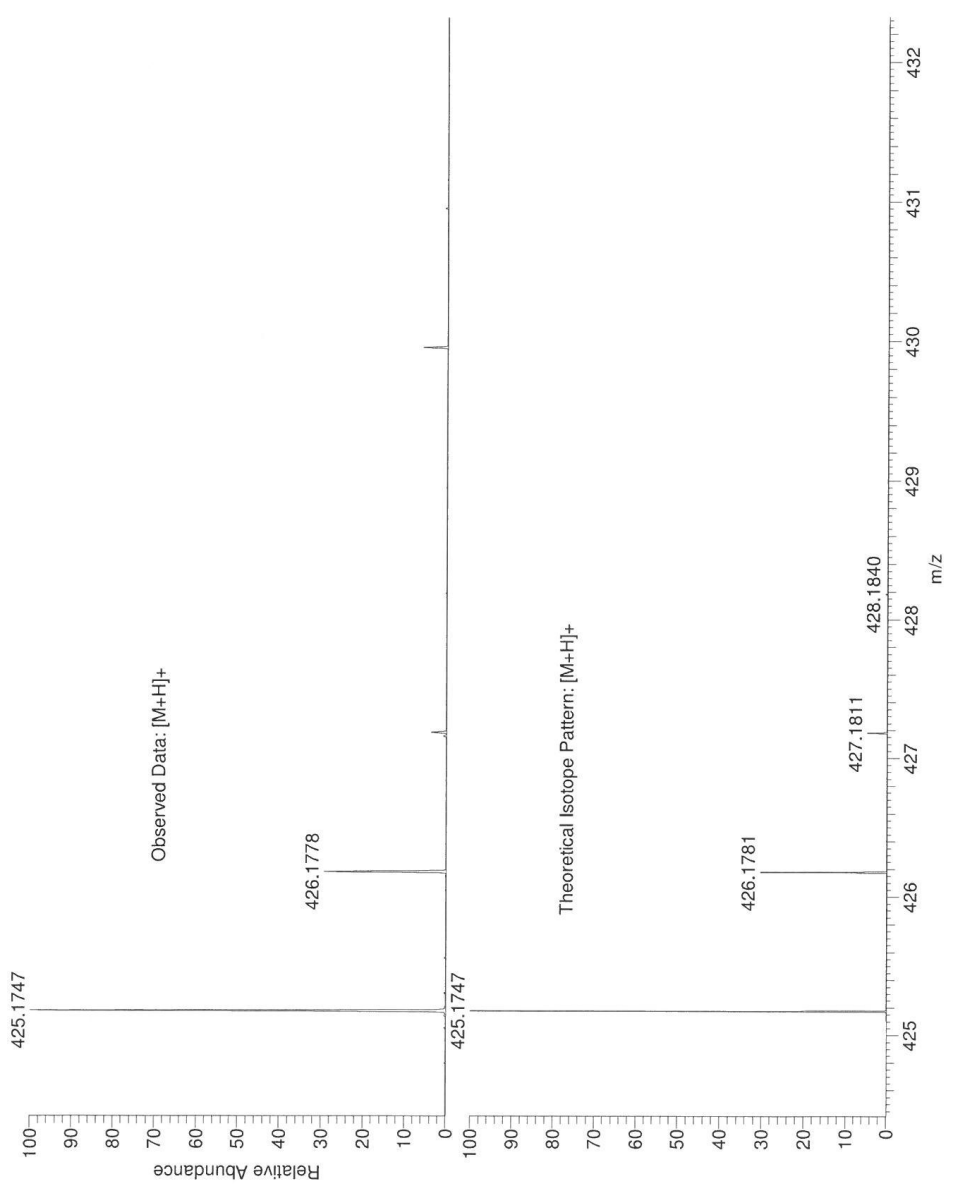

NL:  
1.71E4  
C<sub>28</sub>H<sub>24</sub>O<sub>4</sub>H:  
C<sub>28</sub>H<sub>25</sub>O<sub>4</sub>  
p (gss, s/p/40) Chrg 1  
R: 100000 Res .Pwr . @FWHM

Isotope: Min. ... Max.  
 14 N 0...15  
 16 O 0...15  
 12 C 0...60  
 1 H 0...70  
 23 Na 0...0  
 Tolerance Window: +- 5.00 ppm  
 Db/Ring Equiv: -3.. 100  
 Fits: 100

N-Rule: Do not use  
 Charge: 1

| Mass     | Theoretical Mass | Delta [ppm] | RDB  | Composition                                                    |
|----------|------------------|-------------|------|----------------------------------------------------------------|
| 425.1747 | 425.1747         | -0.1        | 16.5 | C <sub>28</sub> H <sub>25</sub> O <sub>1</sub>                 |
| 425.1752 | 425.1752         | -1.3        | 9.5  | C <sub>15</sub> H <sub>21</sub> O <sub>3</sub> N <sub>2</sub>  |
| 425.1752 | 425.1752         | -1.3        | 4.0  | C <sub>14</sub> H <sub>27</sub> O <sub>10</sub> N <sub>5</sub> |
| 425.1739 | 425.1739         | 1.9         | -1.0 | C <sub>13</sub> H <sub>31</sub> O <sub>14</sub> N <sub>1</sub> |
| 425.1739 | 425.1739         | 1.9         | 4.5  | C <sub>12</sub> H <sub>25</sub> O <sub>8</sub> N <sub>2</sub>  |
| 425.1739 | 425.1739         | 1.9         | 10.0 | C <sub>11</sub> H <sub>19</sub> O <sub>1</sub> N <sub>15</sub> |
| 425.1734 | 425.1734         | 3.1         | 17.0 | C <sub>10</sub> H <sub>23</sub> O <sub>1</sub> N <sub>5</sub>  |
| 425.1761 | 425.1761         | -3.2        | 21.5 | C <sub>9</sub> H <sub>21</sub> N <sub>1</sub>                  |
| 425.1766 | 425.1766         | -4.4        | 9.0  | C <sub>8</sub> H <sub>21</sub> O <sub>1</sub> N <sub>1</sub>   |
| 425.1766 | 425.1766         | -4.4        | 3.5  | C <sub>15</sub> H <sub>23</sub> O <sub>1</sub> N <sub>2</sub>  |

Figure S20  $^1\text{H}$  NMR spectrum of compound **9** in  $\text{d}_6$ -acetone +  $\text{CF}_3\text{CO}_2\text{H}$  after 2 h

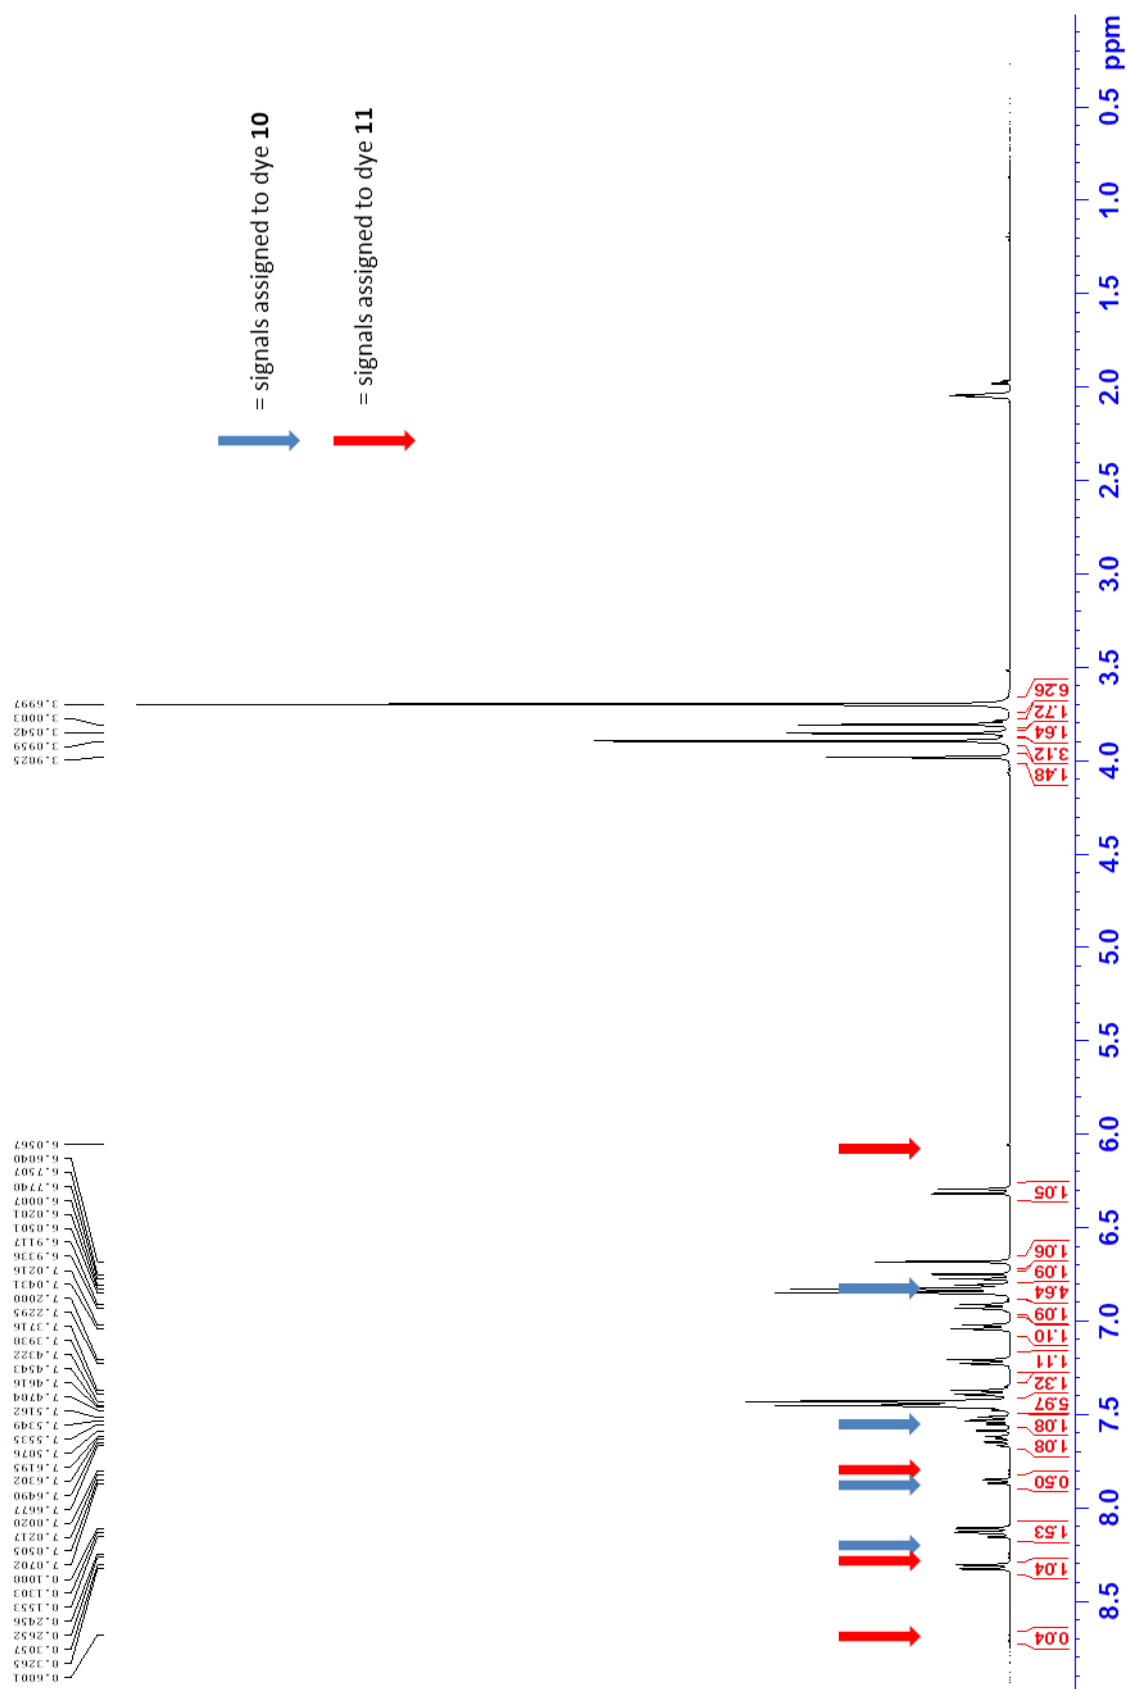

Figure S21  $^1\text{H}$  NMR spectrum of compound **10** in  $\text{d}_6$ -acetone +  $\text{CF}_3\text{CO}_2\text{H}$  after 2 h

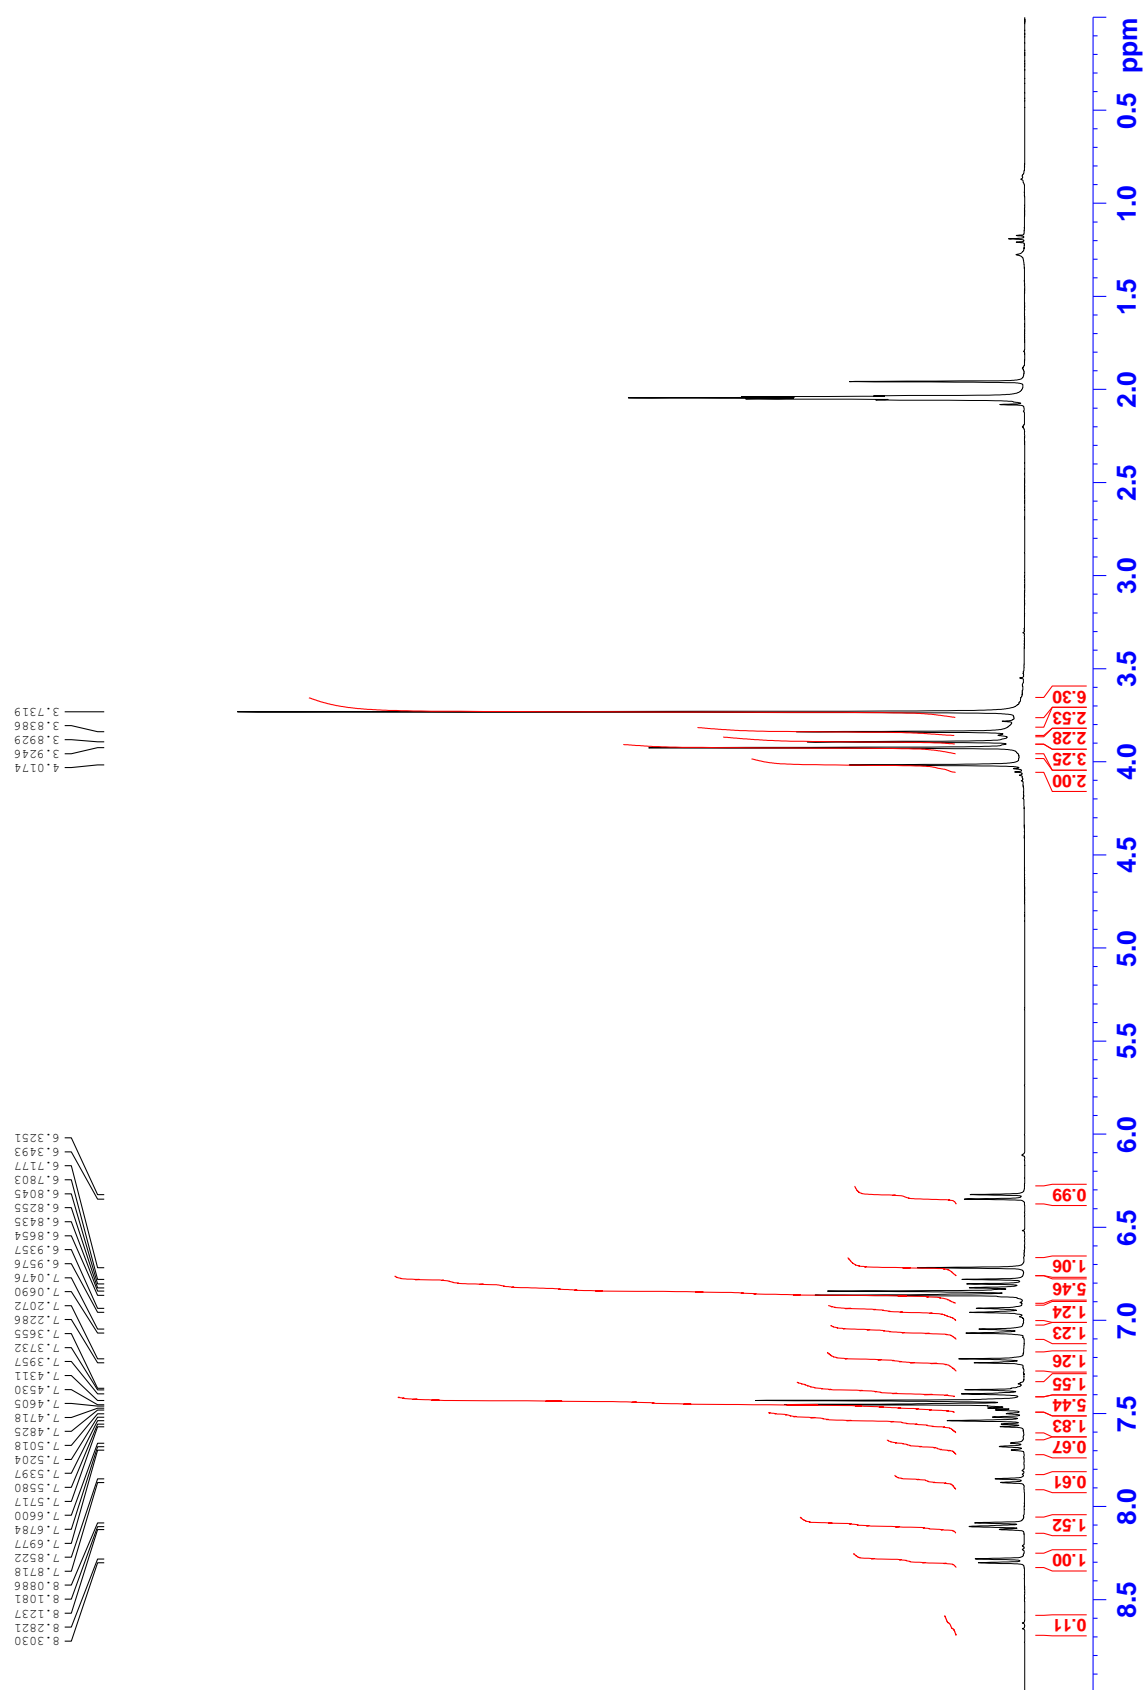

Figure S22  $^1\text{H}$  NMR spectrum of compound **12** in commercial  $\text{CDCl}_3$

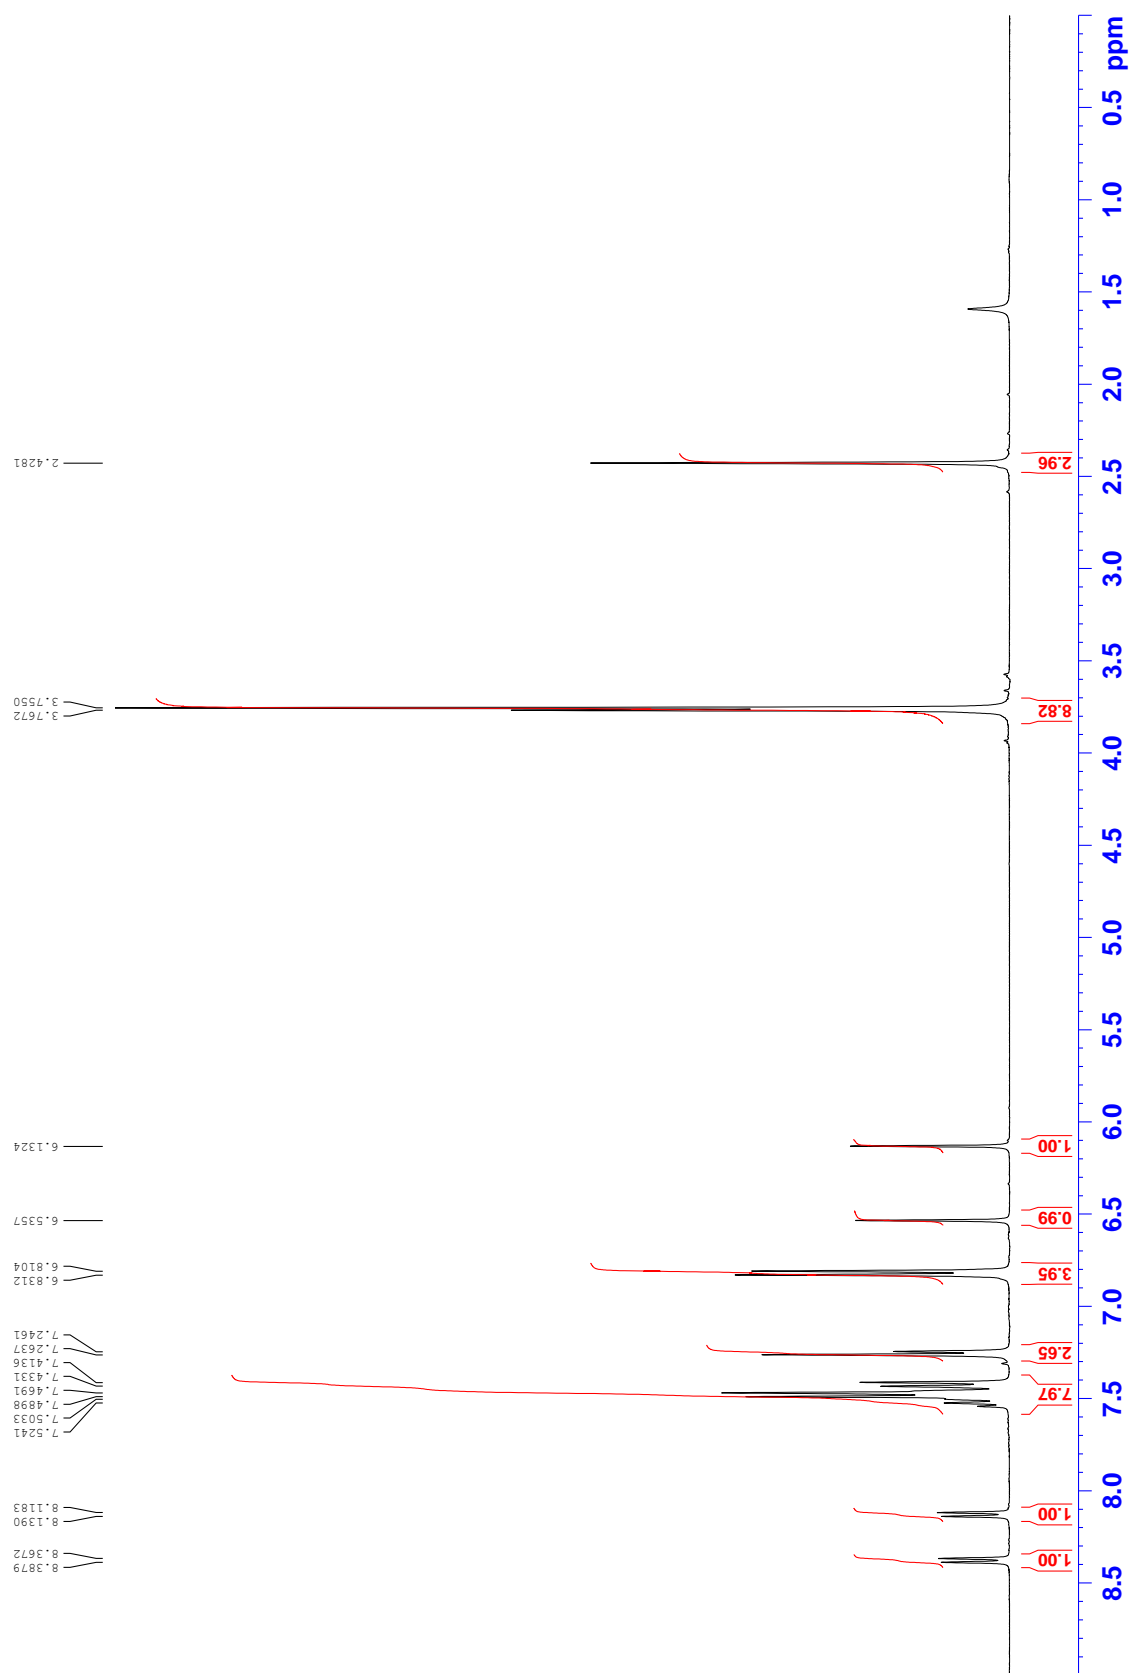

Figure S23  $^{13}\text{C}$  NMR spectrum of compound **12** in commercial  $\text{CDCl}_3$

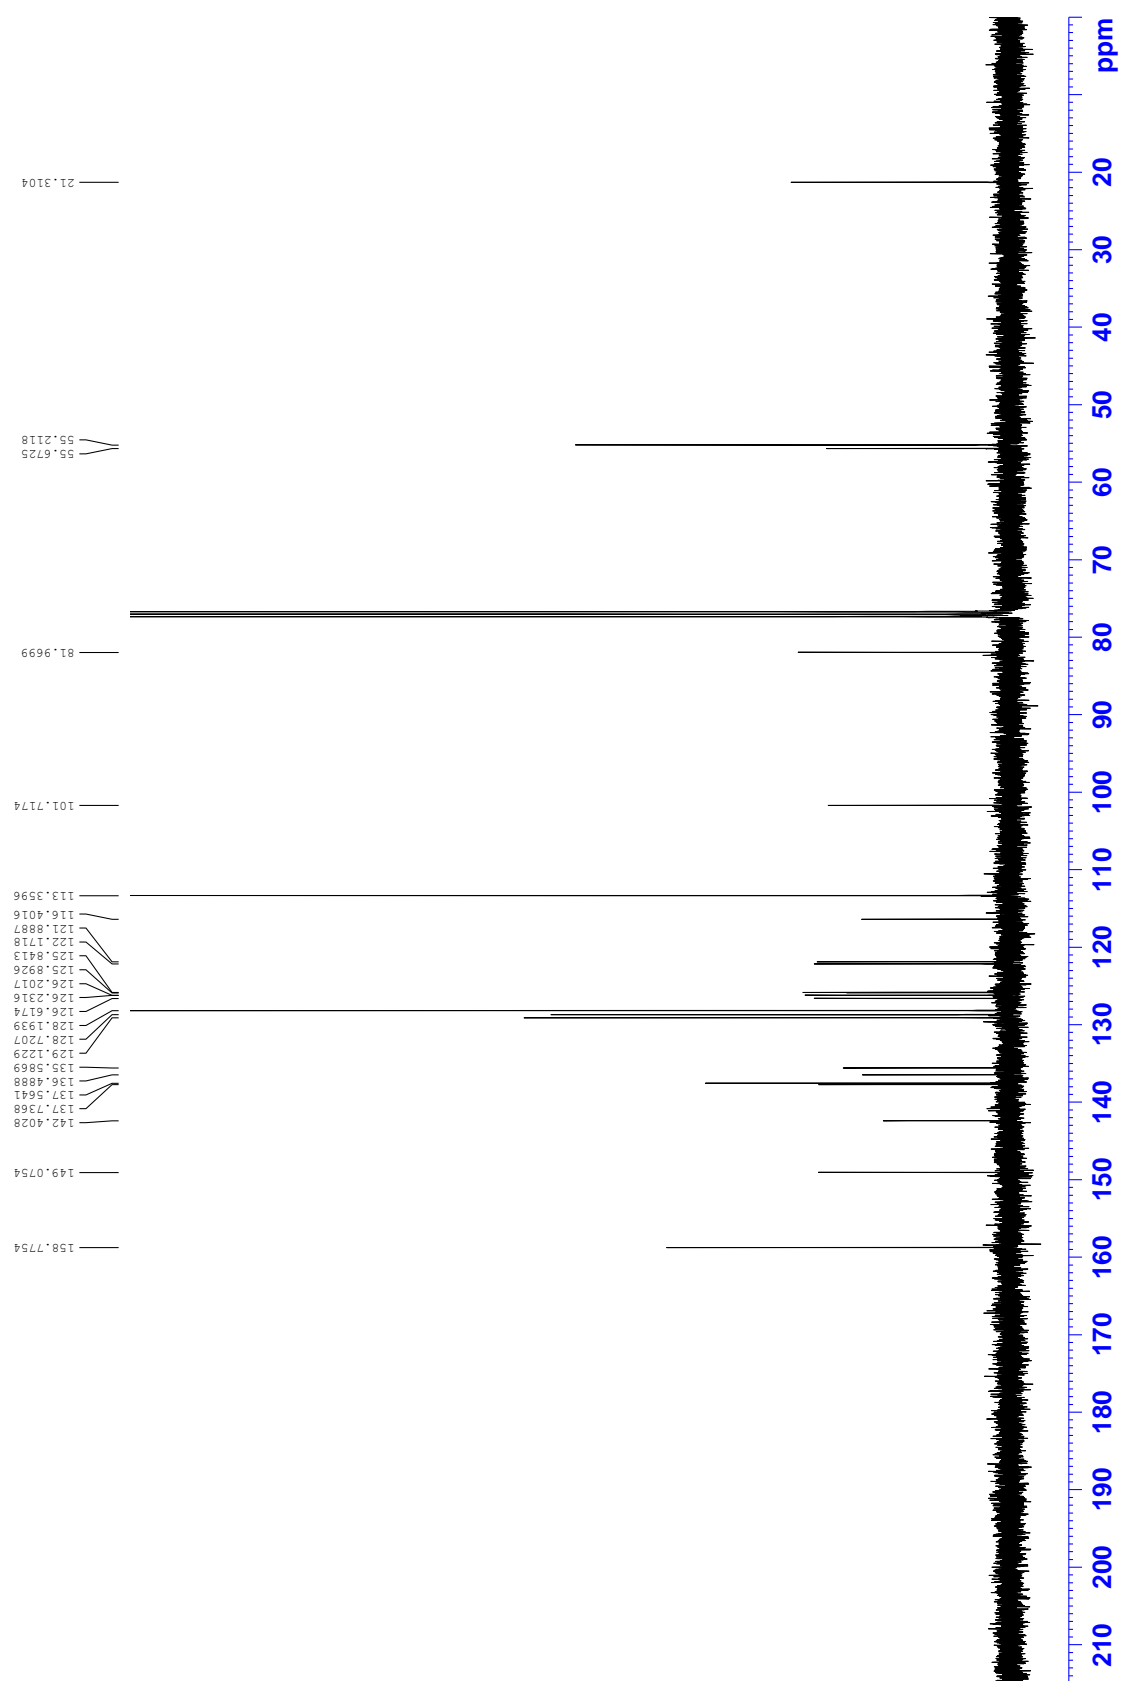

Figure S24 Mass Spectral data for compound 12

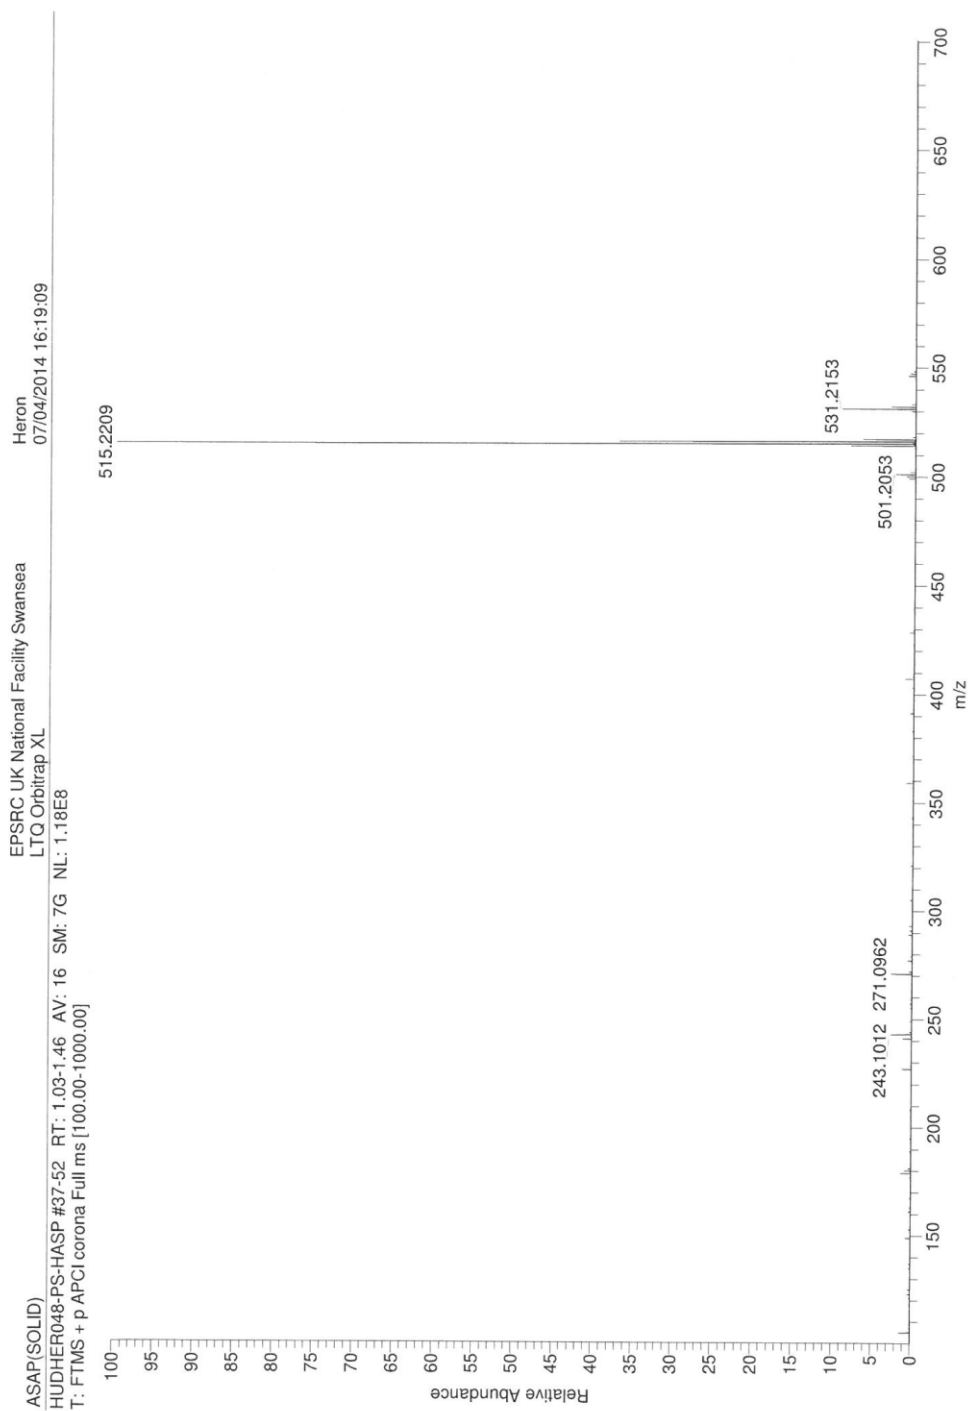

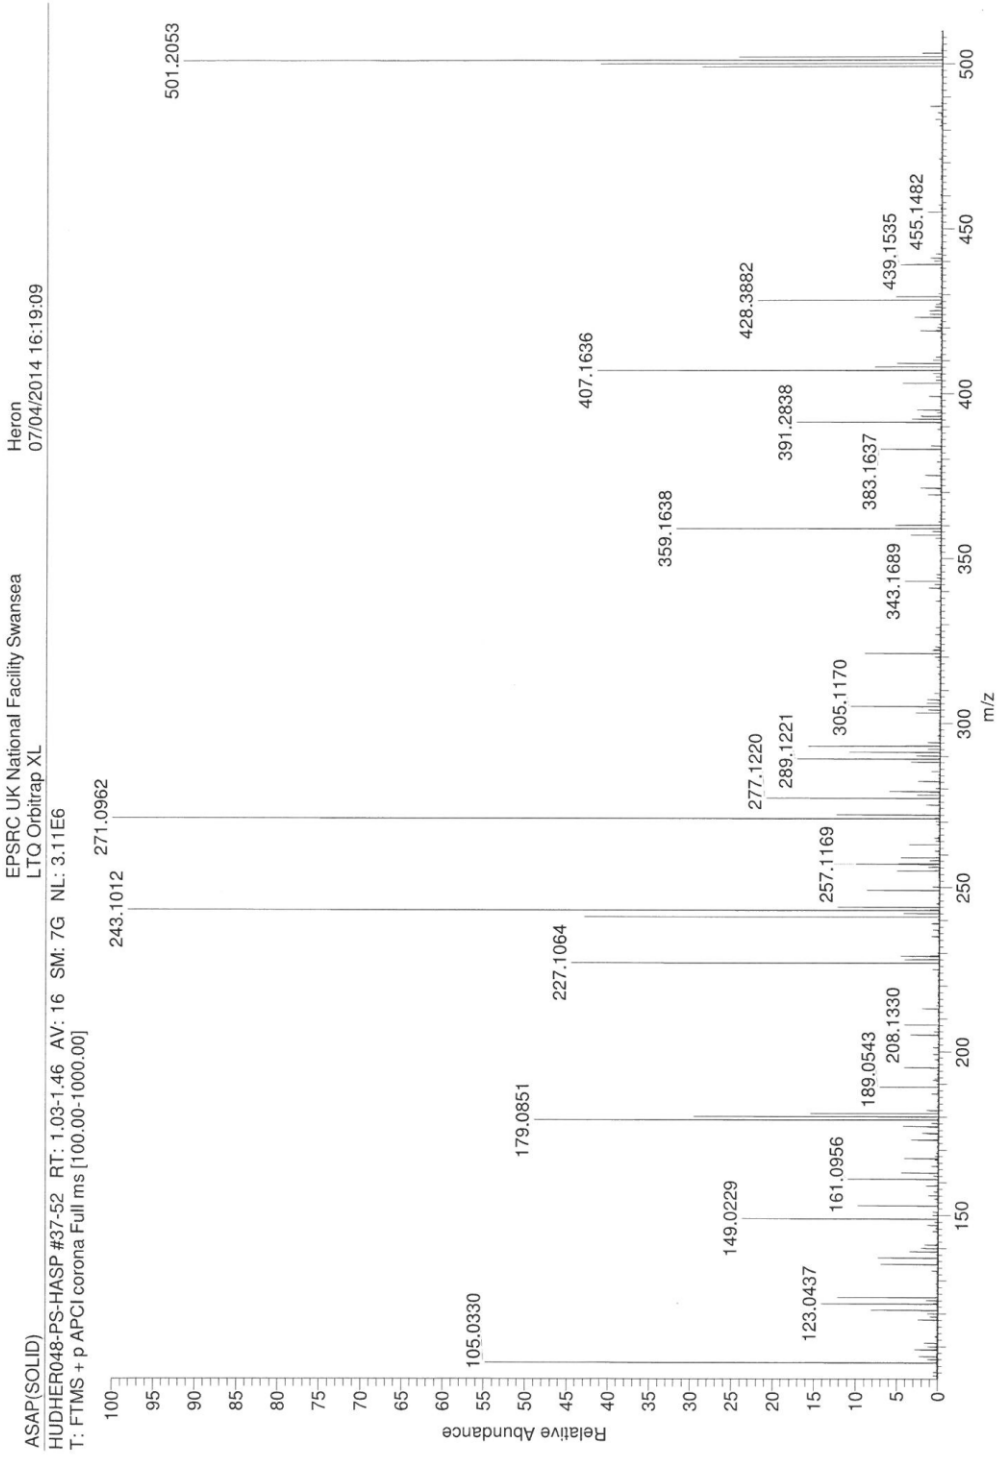



ASAP(SOLID)  
HUDHER048-PS-HASP #37-52 RT: 1.03-1.46 AV: 16 SM: 7G NL: 1.09E7  
T: FTMS + p APCI corona Full ms [100.00-1000.00]

EPSRC UK National Facility Swansea  
LTG Orbitrap XL

Heron  
07/04/2014 16:19:09

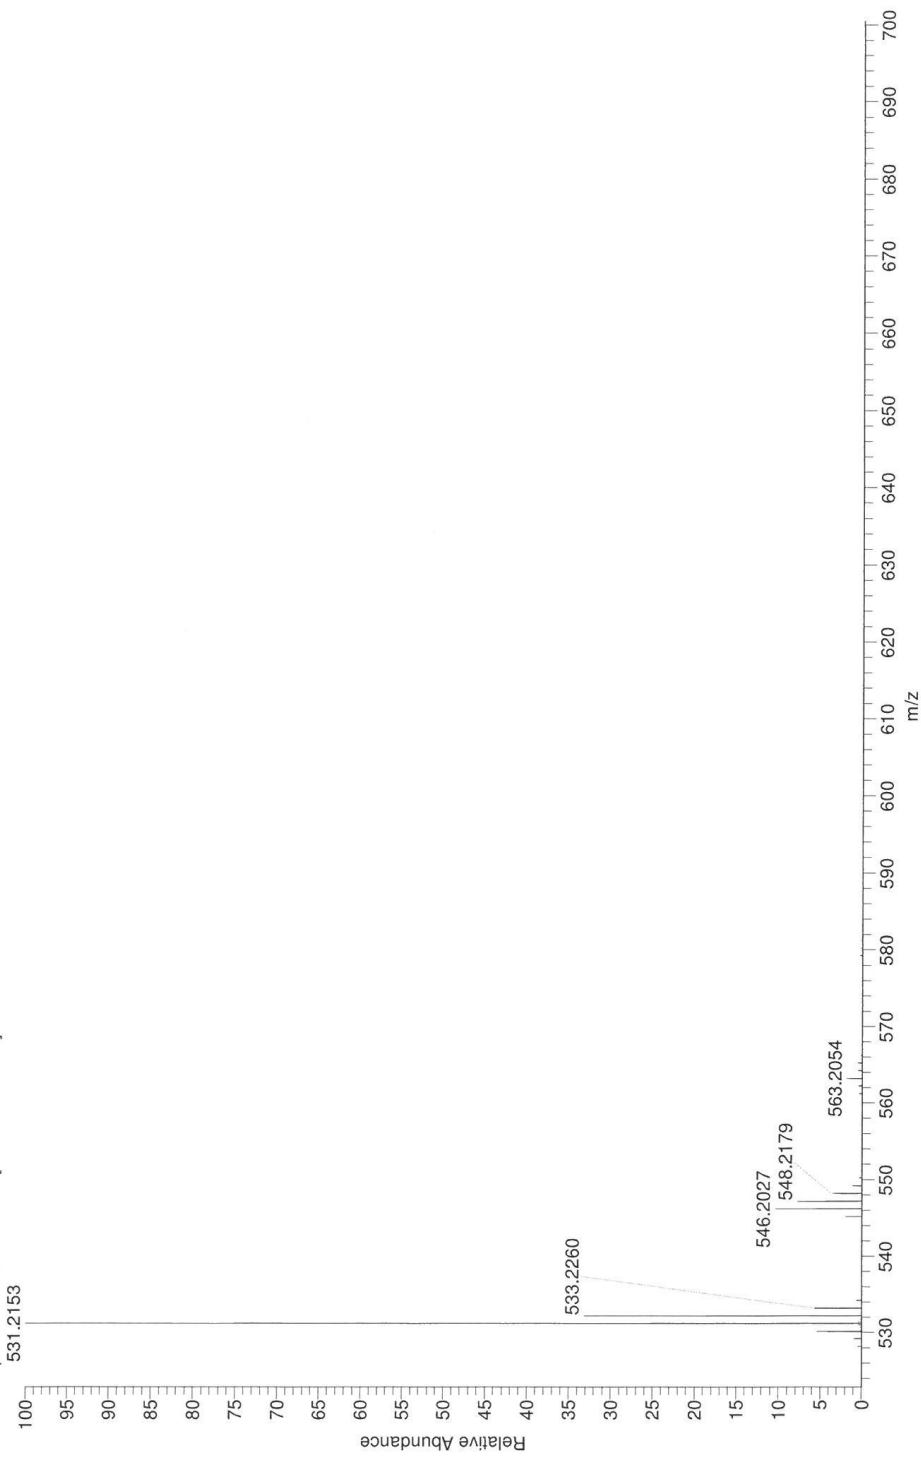

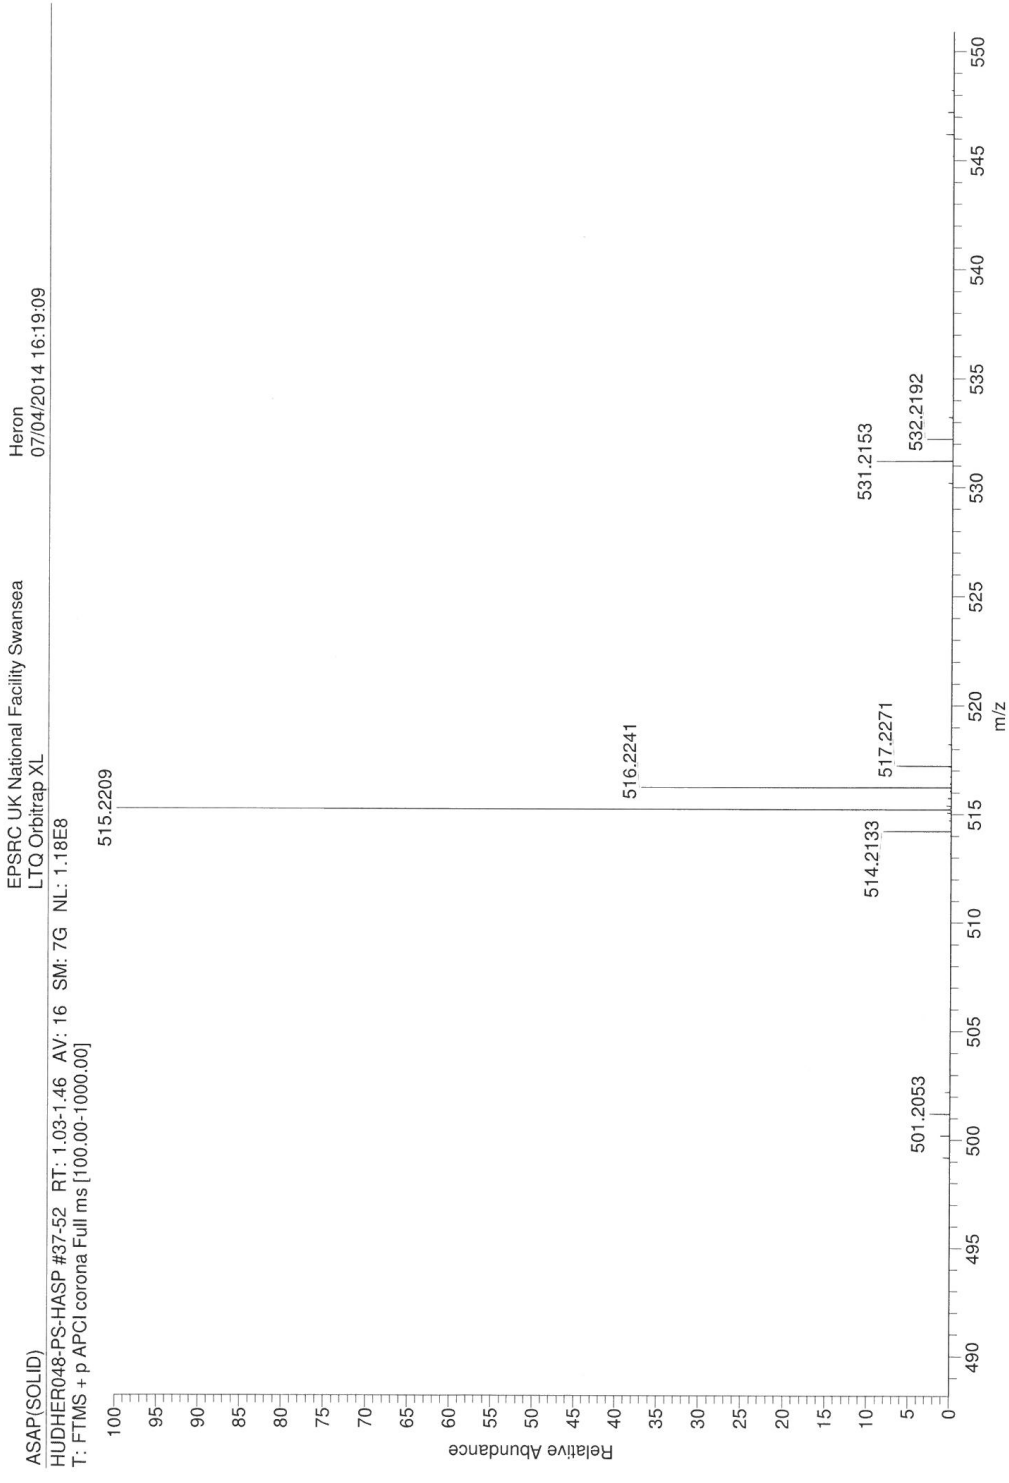

NL: 1.18E8  
HUDHER048-PS-HASP#37-52  
RT: 1.03-1.46 AV: 16 T:  
FTMS + p APCI corona Full ms  
[100.00-1000.00]

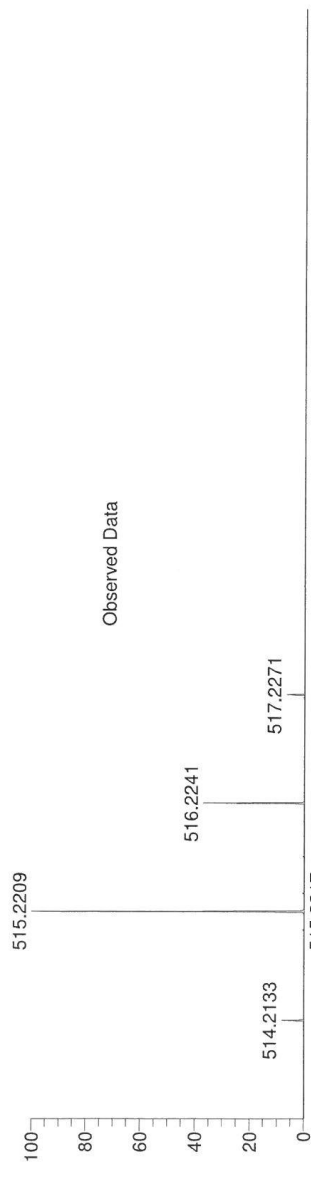

NL: 1.59E4  
C<sub>35</sub> H<sub>30</sub> O<sub>4</sub> H:  
C<sub>35</sub> H<sub>31</sub> O<sub>4</sub>  
p (gss, s/p;40) Chrg 1  
R: 100000 Res .Pwr . @FWHM

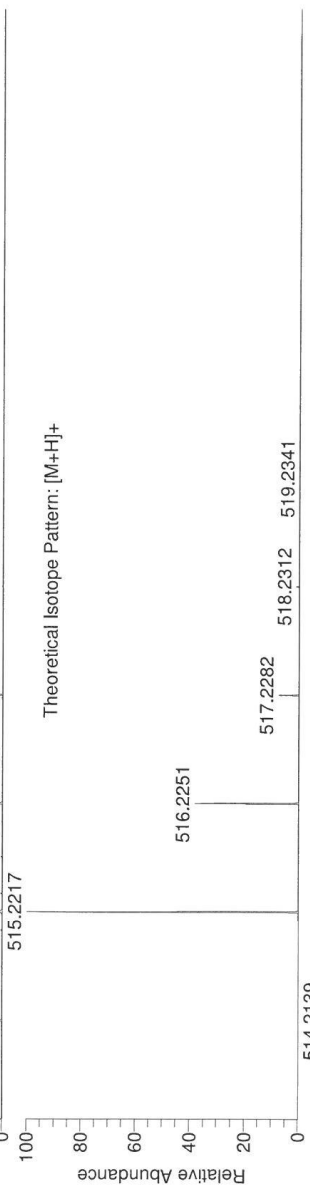

NL: 1.59E4  
C<sub>35</sub> H<sub>30</sub> O<sub>4</sub>:  
C<sub>35</sub> H<sub>30</sub> O<sub>4</sub>  
p (gss, s/p;40) Chrg 1  
R: 100000 Res .Pwr . @FWHM

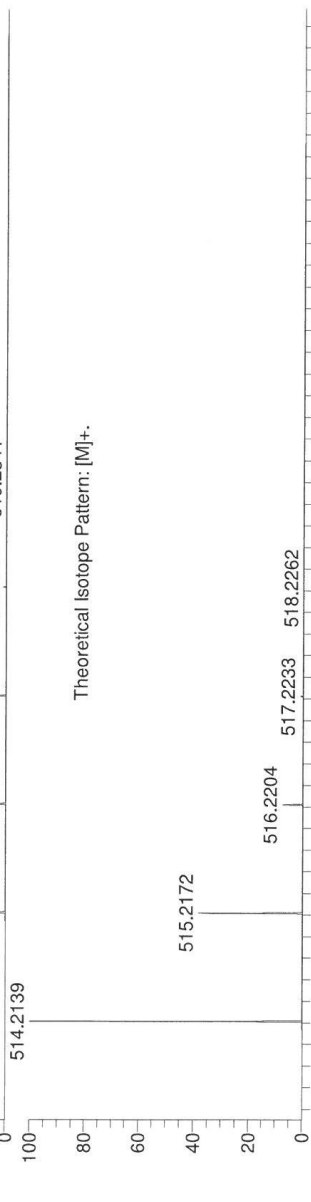

Isotope:           Min. ... Max.  
 14 N               0 ... 14  
 16 O               0 ... 16  
 12 C               0 ... 90  
 1 H                0 ... 100  
 23 Na              0 ... 0  
 Tolerance Window: +- 5.00 ppm  
 DB/Ring Equiv:   -3 ... 100  
 Fits:              100

N-Rule: Do not use  
 Charge: 1

| Mass     | Theoretical Mass | Delta [ppm] | RDB  | Composition                                                   |
|----------|------------------|-------------|------|---------------------------------------------------------------|
| 515.2209 | 515.2209         | 0.1         | 3.0  | C <sub>20</sub> H <sub>17</sub> O <sub>4</sub> N <sub>1</sub> |
| 515.2209 | 515.2209         | 0.1         | 8.5  | C <sub>19</sub> H <sub>21</sub> O <sub>4</sub> N <sub>1</sub> |
| 515.2203 | 515.2203         | 1.1         | 21.0 | C <sub>19</sub> H <sub>21</sub> O <sub>4</sub> N <sub>1</sub> |
| 515.2217 | 515.2217         | -1.5        | 20.5 | C <sub>19</sub> H <sub>21</sub> O <sub>4</sub> N <sub>1</sub> |
| 515.2222 | 515.2222         | -2.5        | 13.5 | C <sub>20</sub> H <sub>17</sub> O <sub>4</sub> N <sub>1</sub> |
| 515.2222 | 515.2222         | -2.5        | 8.0  | C <sub>21</sub> H <sub>13</sub> O <sub>4</sub> N <sub>5</sub> |
| 515.2195 | 515.2195         | 2.7         | 3.5  | C <sub>18</sub> H <sub>15</sub> O <sub>4</sub> N <sub>5</sub> |
| 515.2195 | 515.2195         | 2.7         | 9.0  | C <sub>17</sub> H <sub>19</sub> O <sub>4</sub> N <sub>4</sub> |
| 515.2190 | 515.2190         | 3.7         | 21.5 | C <sub>17</sub> H <sub>19</sub> O <sub>4</sub> N <sub>1</sub> |
| 515.2230 | 515.2230         | -4.1        | 25.5 | C <sub>18</sub> H <sub>17</sub> O <sub>4</sub> N <sub>6</sub> |

Figure S25  $^1\text{H}$  NMR spectrum of compound **13** in commercial  $\text{CDCl}_3$

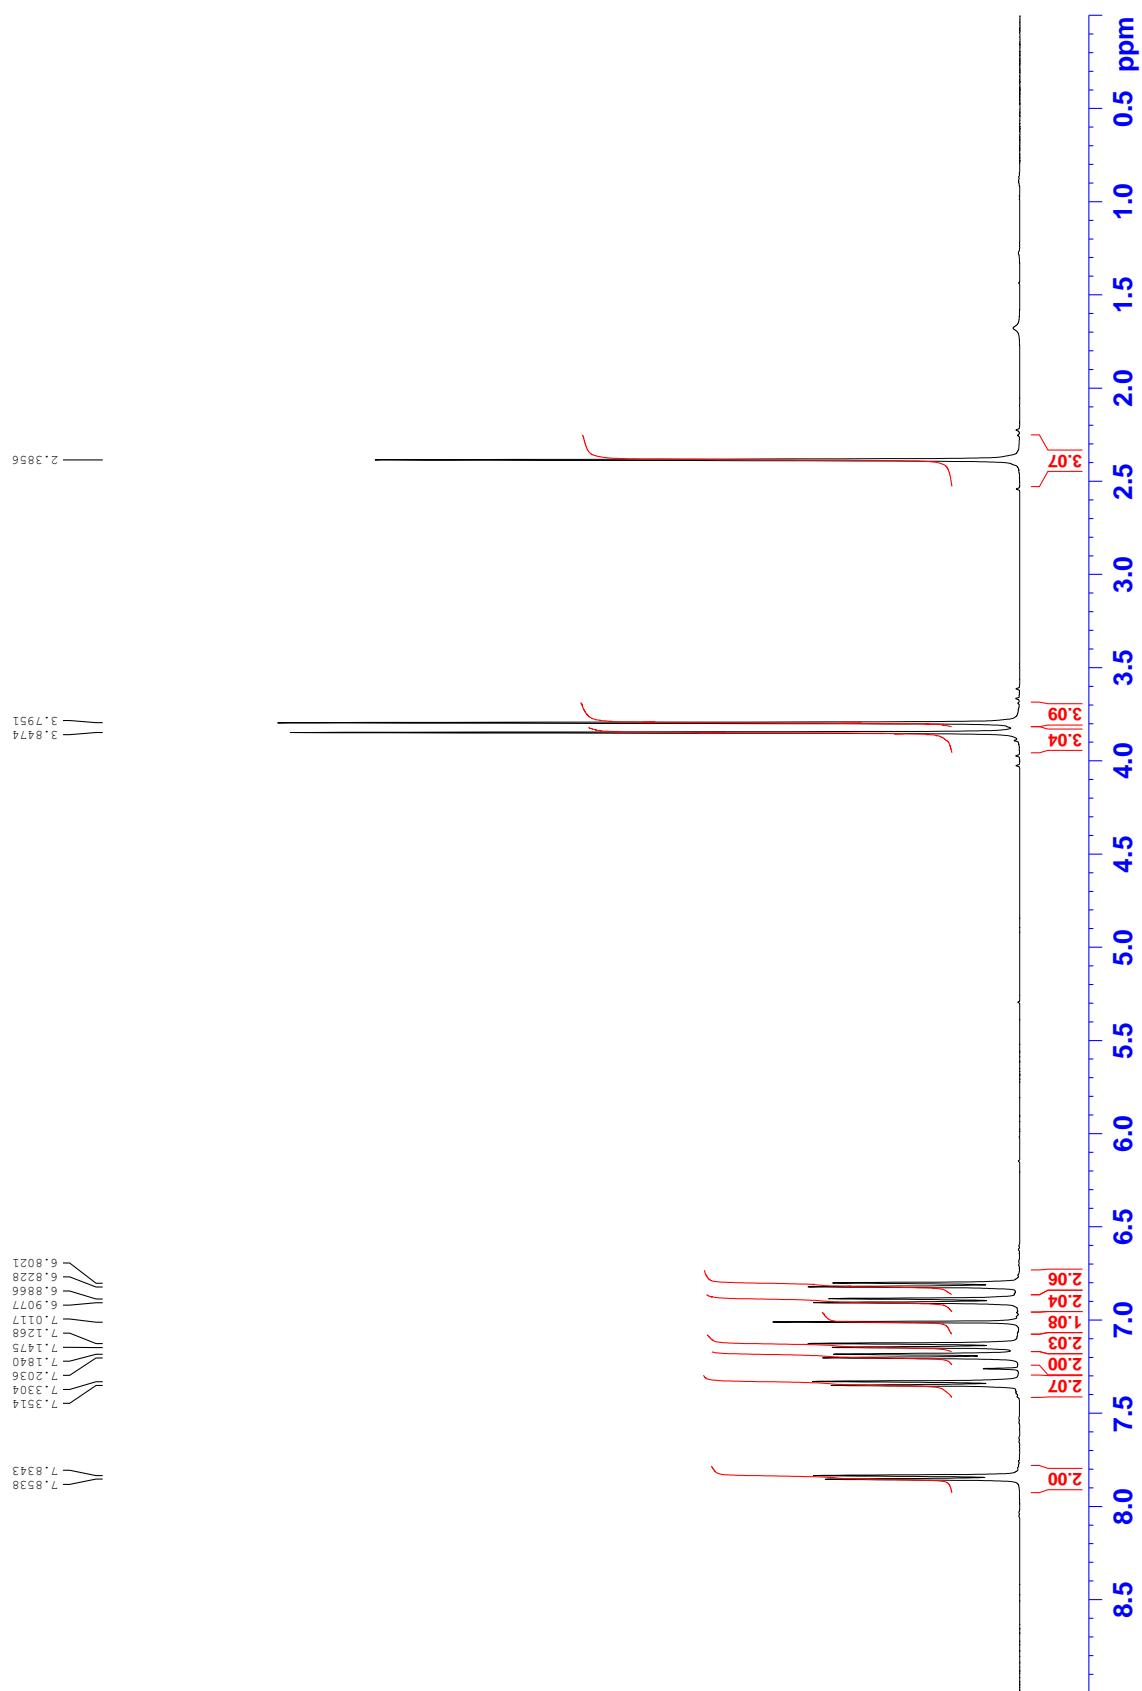

Figure S26  $^{13}\text{C}$  NMR spectrum of compound **13** in commercial  $\text{CDCl}_3$

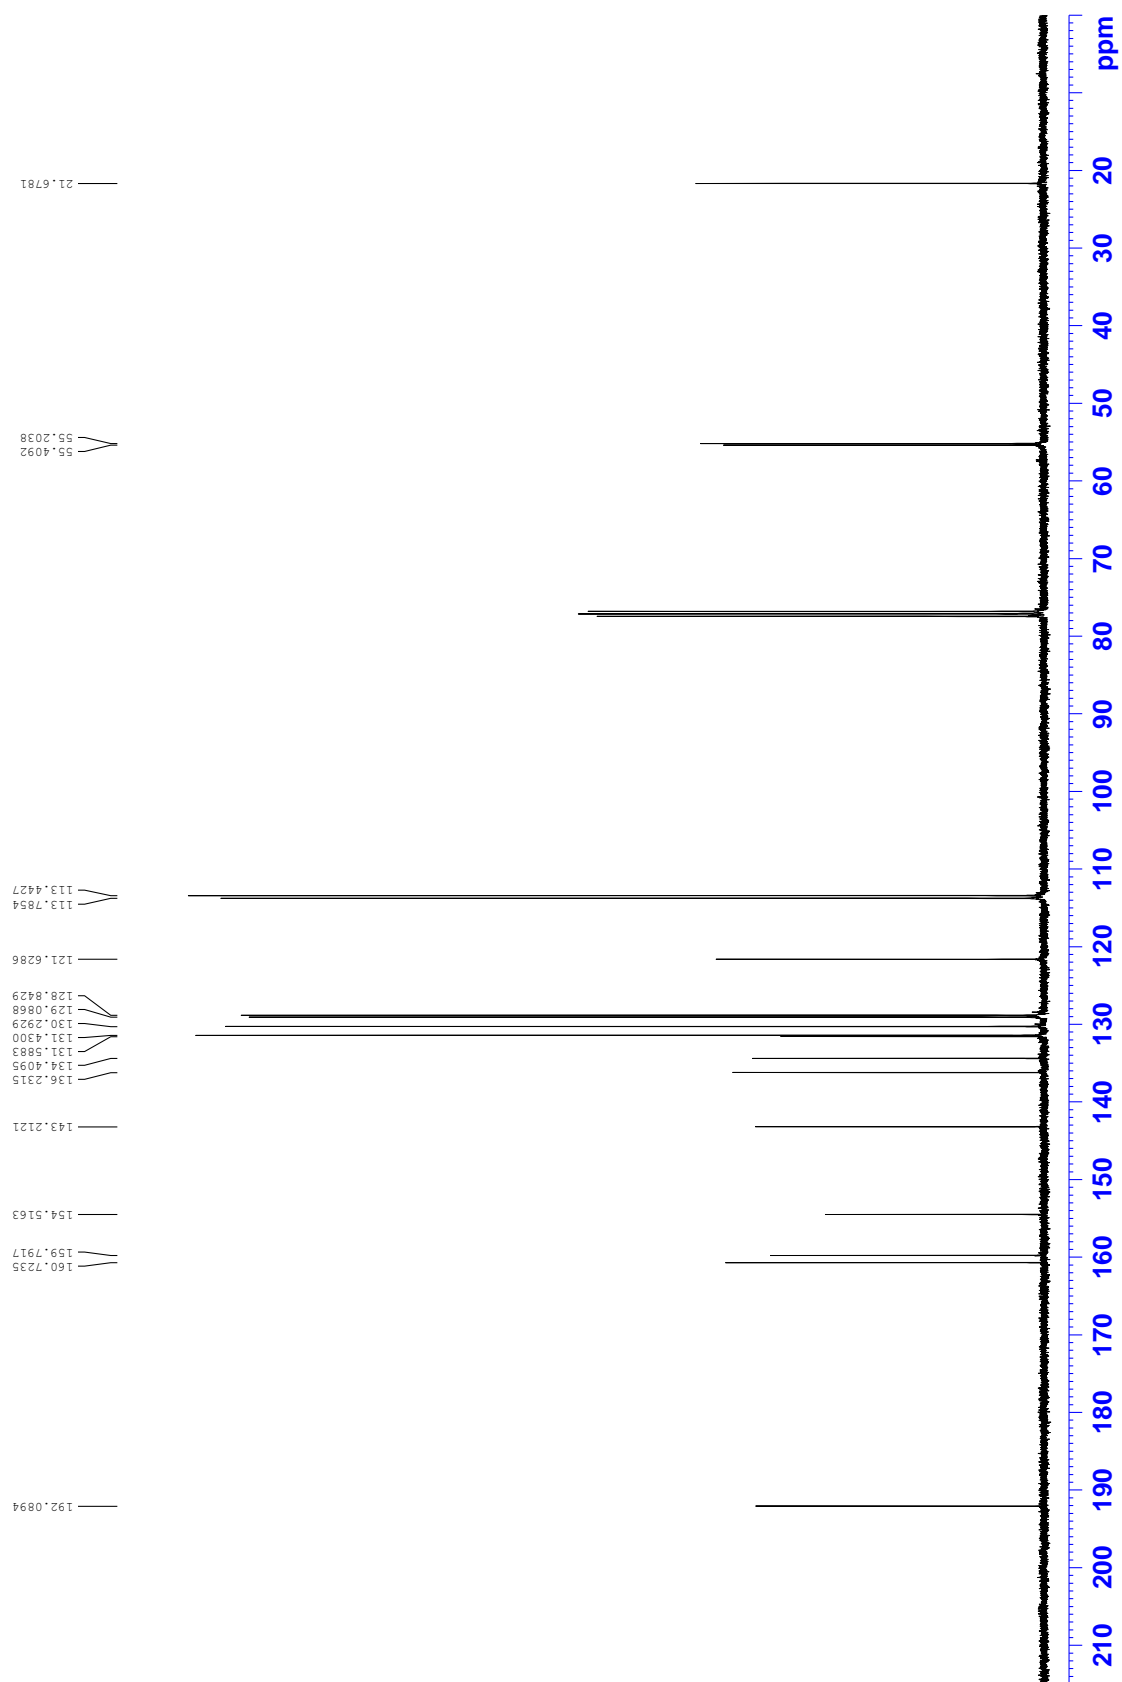

Figure S27 Mass Spectral data for compound 13

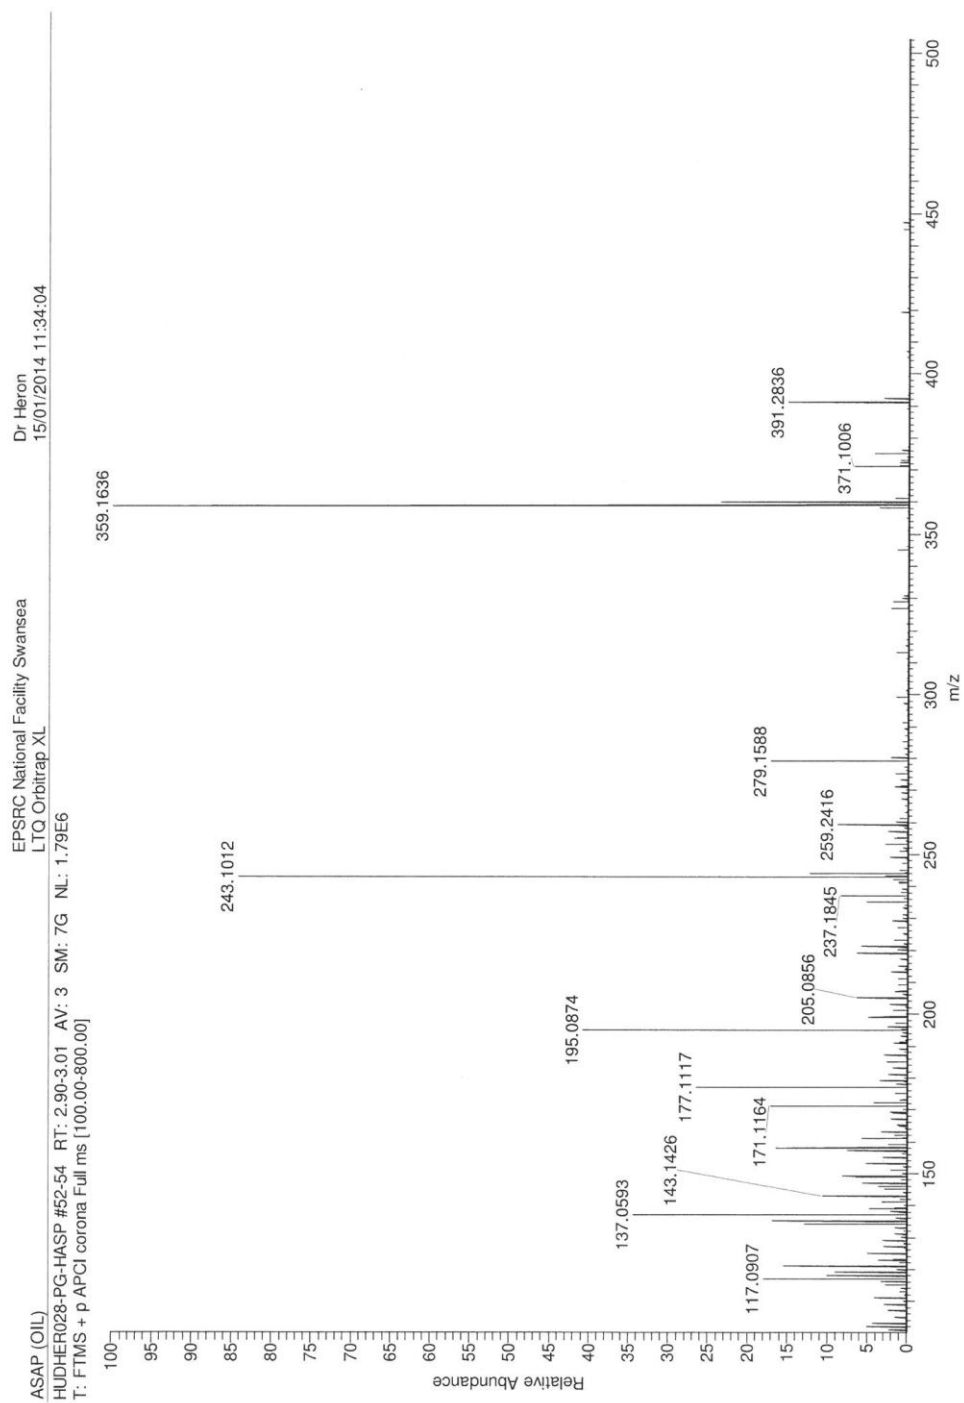

ASAP (OIL)

EPSRC National Facility Swansea  
LTQ Orbitrap XL

HUDHER028-PG-HASP #52-54 RT: 2.90-3.01 AV: 3 SM: 7G NL: 1.51E6

Dr Heron  
15/01/2014 11:34:04

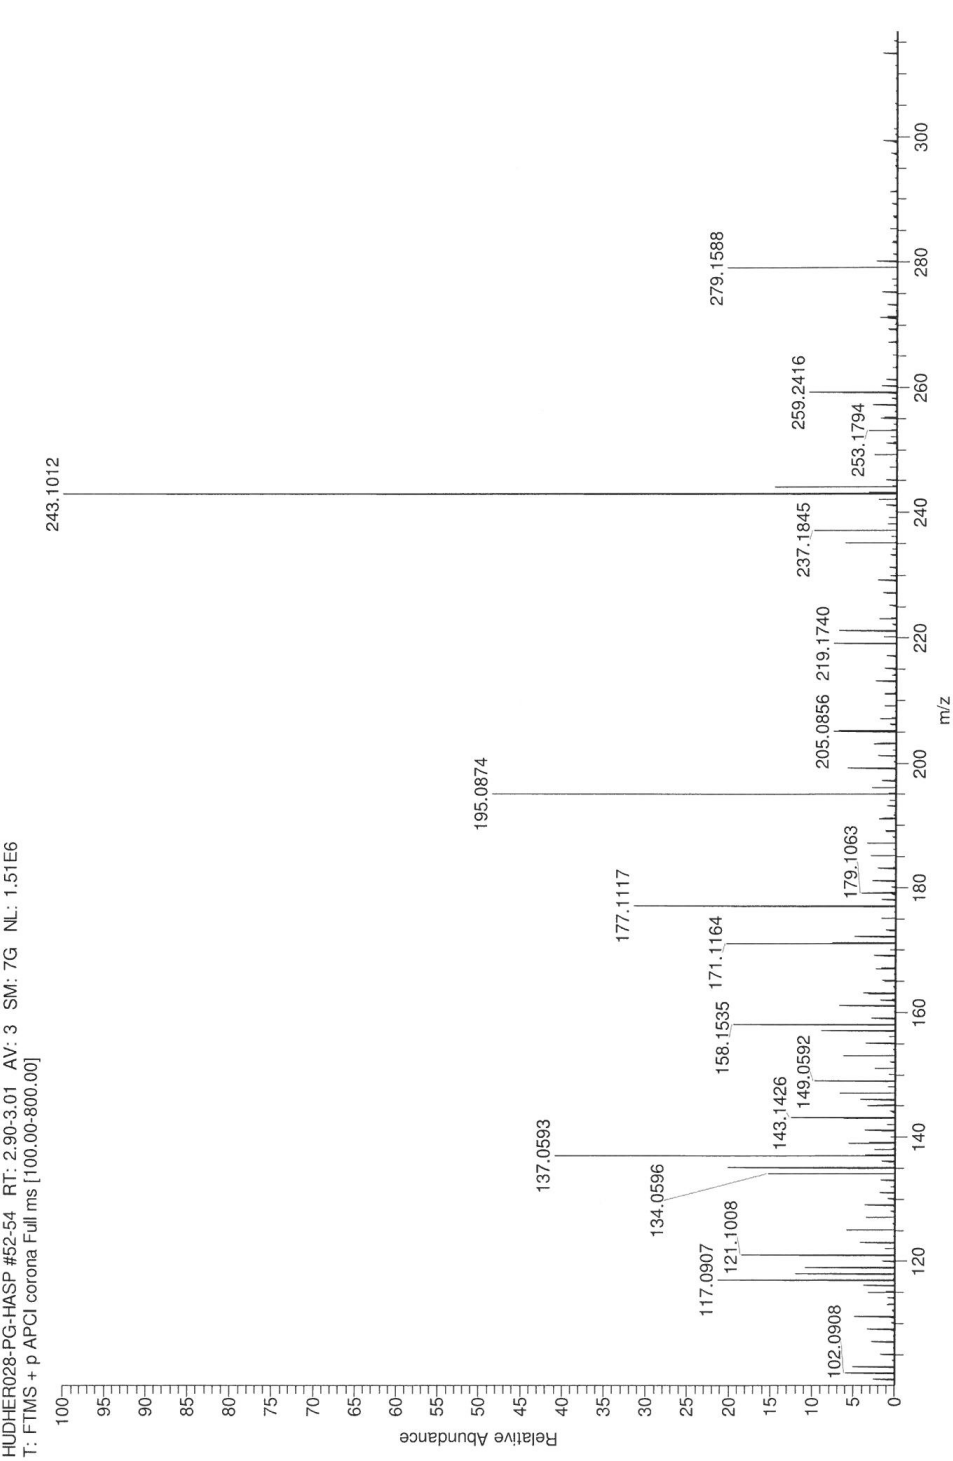



ASAP (OIL) EPSRC National Facility Swansea Dr Heron  
LTO Orbitrap XL 15/01/2014 11:34:04

HUDHER028-PG-HASP #52-54 RT: 2.90-3.01 AV: 3 SM: 7G NL: 1.79E6  
T: FTMS + p APCI corona Full ms [100.00-800.00]

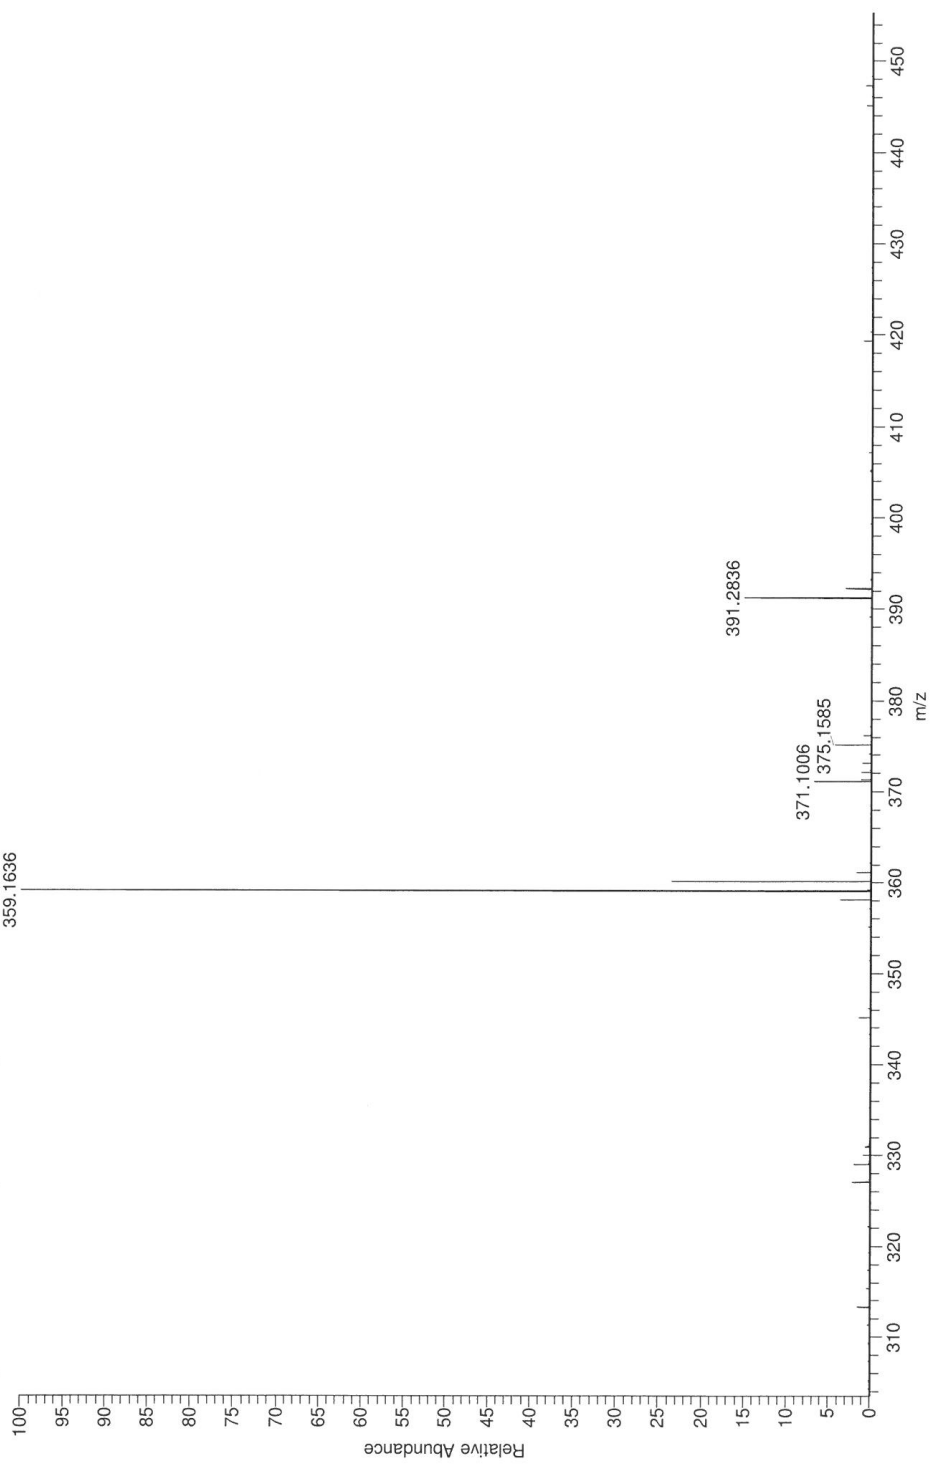

NL:  
1.79E6  
HUDHER028-PG-HASP#52-54  
RT: 2.90-3.01 AV: 3 T: FTMS  
+ p APCI corona Full ms  
[100.00-800.00]

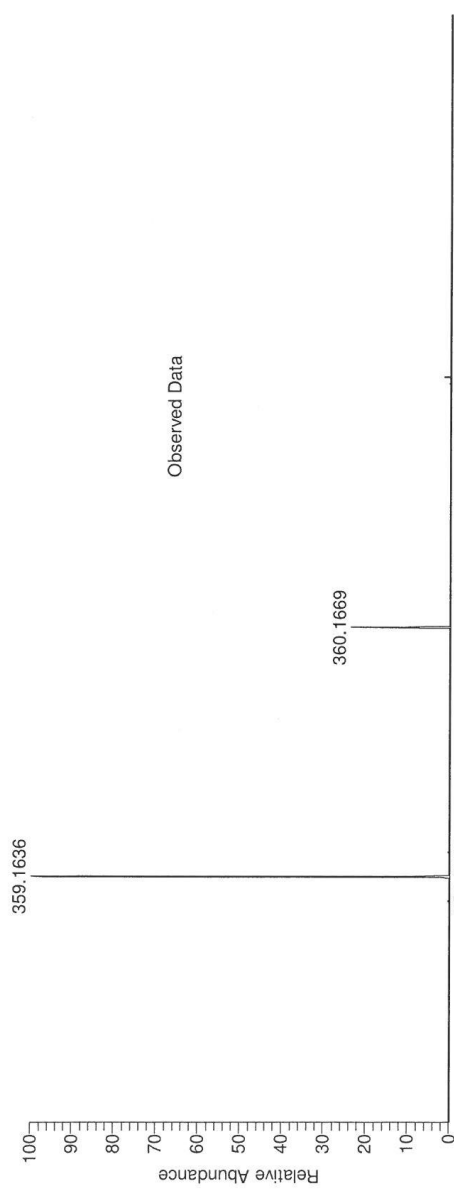

NL:  
1.79E4  
C<sub>24</sub>H<sub>22</sub>O<sub>3</sub>H:  
C<sub>24</sub>H<sub>23</sub>O<sub>3</sub>  
p (gss, s/p:40) Chrg 1  
R: 100000 Res .Pwr . @FWHM

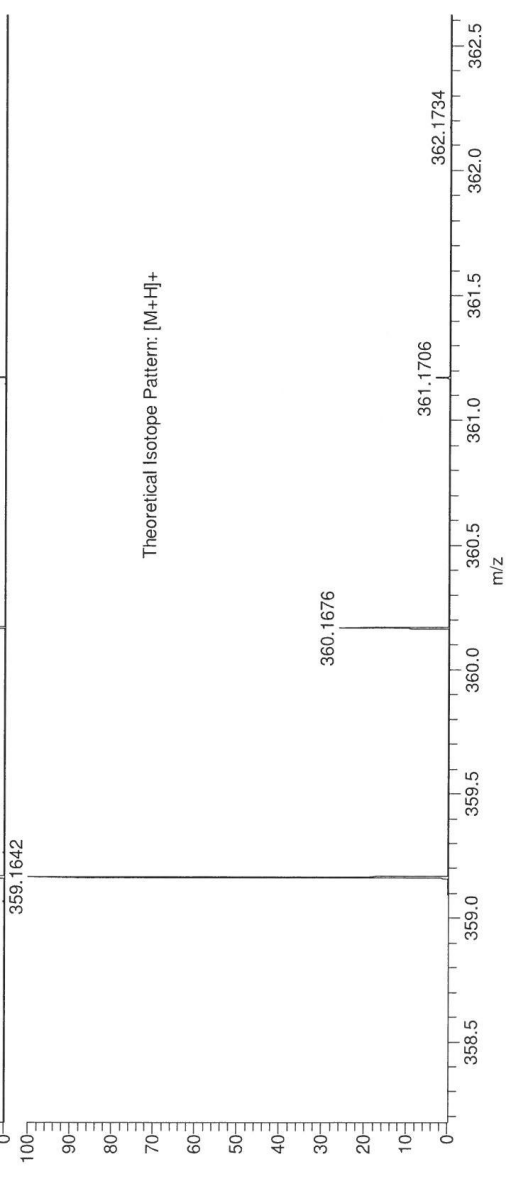

Isotope: Min. ... Max.  
 14 N 0....12  
 16 O 0....13  
 12 C 0....60  
 1 H 0....70  
 23 Na 0....0

Tolerance Window: +- 5.00 ppm  
 DB/Ring Equiv: -3.. 100  
 Fits: 100

N-Rule: Do not use  
 Charge: 1

| Mass     | Theoretical Mass | Delta [ppm] | RDB  | Composition                                                                |
|----------|------------------|-------------|------|----------------------------------------------------------------------------|
| 359.1636 | 359.1633         | 0.7         | 1.5  | C <sub>8</sub> H <sub>17</sub> O <sub>6</sub> N <sub>6</sub>               |
|          | 359.1642         | -1.6        | 13.5 | C <sub>8</sub> H <sub>13</sub> O <sub>6</sub>                              |
|          | 359.1628         | 2.1         | 14.0 | C <sup>14</sup> H <sup>13</sup> O <sub>6</sub> N <sub>3</sub>              |
|          | 359.1647         | -3.0        | 6.5  | C <sub>9</sub> H <sub>15</sub> O <sub>4</sub> N <sup>15</sup> <sub>3</sub> |
|          | 359.1647         | -3.0        | 1.0  | C <sub>10</sub> H <sub>25</sub> O <sub>9</sub> N <sub>5</sub>              |
|          | 359.1620         | 4.5         | 2.0  | C <sub>6</sub> H <sub>11</sub> O <sub>7</sub> N <sub>11</sub>              |

Cartesian coordinates (Å) for molecule **10** (ground-state) obtained by DFT [PCM-PBE0/6-31G(d)]

E= -1380.71673921 au

|   |           |           |           |
|---|-----------|-----------|-----------|
| 6 | 2.499386  | -1.472469 | 0.290691  |
| 6 | 3.802944  | -1.845077 | 0.366646  |
| 6 | 4.877383  | -0.912922 | 0.048774  |
| 6 | 4.556871  | 0.403601  | -0.342565 |
| 6 | 3.150105  | 0.853277  | -0.441342 |
| 6 | 2.108103  | -0.144894 | -0.110712 |
| 1 | 6.473126  | -2.305126 | 0.427107  |
| 1 | 1.720409  | -2.181125 | 0.546744  |
| 6 | 6.224689  | -1.293335 | 0.125791  |
| 6 | 5.581331  | 1.305535  | -0.646540 |
| 6 | 6.911015  | 0.920003  | -0.567693 |
| 6 | 7.228848  | -0.385044 | -0.179834 |
| 1 | 5.301704  | 2.311430  | -0.944587 |
| 1 | 7.700801  | 1.626792  | -0.805631 |
| 1 | 8.268709  | -0.693947 | -0.115979 |
| 8 | 2.879521  | 2.007326  | -0.785977 |
| 6 | 0.802046  | 0.281515  | -0.206156 |
| 6 | -0.368556 | -0.500609 | -0.013669 |
| 1 | 0.678935  | 1.323699  | -0.491365 |
| 1 | -0.243829 | -1.573428 | 0.114475  |
| 6 | -1.658583 | -0.025613 | -0.021970 |
| 6 | -1.968911 | 1.415413  | -0.002719 |
| 6 | -1.301548 | 2.301078  | 0.853361  |
| 6 | -2.965183 | 1.948582  | -0.843139 |
| 6 | -1.589045 | 3.662526  | 0.869907  |
| 1 | -0.559034 | 1.913623  | 1.545178  |
| 6 | -3.252295 | 3.300503  | -0.848160 |
| 1 | -3.505302 | 1.287782  | -1.515426 |
| 6 | -2.565374 | 4.172329  | 0.009537  |
| 1 | -1.057143 | 4.308666  | 1.559169  |
| 1 | -4.008719 | 3.710433  | -1.510761 |
| 6 | -2.784113 | -0.973745 | -0.032199 |
| 6 | -3.995988 | -0.673703 | 0.620298  |
| 6 | -2.689107 | -2.217373 | -0.674198 |
| 6 | -5.042559 | -1.576404 | 0.647171  |
| 1 | -4.104601 | 0.277833  | 1.132413  |
| 6 | -3.734952 | -3.132560 | -0.662612 |
| 1 | -1.786729 | -2.466782 | -1.225481 |
| 6 | -4.922911 | -2.817164 | 0.005710  |
| 1 | -5.968494 | -1.344775 | 1.165098  |
| 1 | -3.621161 | -4.075154 | -1.186316 |
| 8 | 4.244608  | -3.068483 | 0.734845  |
| 8 | -5.999708 | -3.627913 | 0.080865  |
| 8 | -2.922347 | 5.472630  | -0.062380 |
| 6 | -2.252764 | 6.393497  | 0.779911  |
| 1 | -2.681086 | 7.370825  | 0.555099  |
| 1 | -2.417830 | 6.159392  | 1.838259  |
| 1 | -1.176071 | 6.412029  | 0.574271  |
| 6 | -5.924755 | -4.894954 | -0.547659 |
| 1 | -5.118273 | -5.503910 | -0.122606 |
| 1 | -6.882769 | -5.380085 | -0.358010 |
| 1 | -5.775709 | -4.795667 | -1.629275 |
| 6 | 3.277431  | -4.045619 | 1.064849  |
| 1 | 2.673453  | -3.730000 | 1.924126  |
| 1 | 3.834588  | -4.947008 | 1.322101  |
| 1 | 2.617384  | -4.252220 | 0.213699  |

Cartesian coordinates (Å) for molecule **10** (excited-state) obtained by DFT [PCM-PBE0/6-31G(d)]

E(TD)= -1380.64376071 au

|   |           |           |           |
|---|-----------|-----------|-----------|
| 6 | 2.519738  | -1.355567 | 0.376330  |
| 6 | 3.857321  | -1.743957 | 0.451403  |
| 6 | 4.901210  | -0.847818 | 0.054644  |
| 6 | 4.544074  | 0.447391  | -0.413878 |
| 6 | 3.146012  | 0.881422  | -0.498942 |
| 6 | 2.128566  | -0.088205 | -0.084487 |
| 1 | 6.527009  | -2.200337 | 0.478827  |
| 1 | 1.754620  | -2.057185 | 0.690735  |
| 6 | 6.261892  | -1.211323 | 0.119131  |
| 6 | 5.562368  | 1.329663  | -0.802260 |
| 6 | 6.894797  | 0.958260  | -0.735088 |
| 6 | 7.245395  | -0.320976 | -0.270477 |
| 1 | 5.269348  | 2.313015  | -1.157956 |
| 1 | 7.670317  | 1.655072  | -1.041505 |
| 1 | 8.290590  | -0.612615 | -0.217209 |
| 8 | 2.838804  | 2.020395  | -0.907401 |
| 6 | 0.765524  | 0.331279  | -0.178112 |
| 6 | -0.357740 | -0.431624 | 0.074394  |
| 1 | 0.647540  | 1.357867  | -0.515463 |
| 1 | -0.217097 | -1.485658 | 0.308920  |
| 6 | -1.707708 | 0.004319  | 0.023768  |
| 6 | -2.053823 | 1.419427  | 0.044258  |
| 6 | -1.341648 | 2.350439  | 0.827332  |
| 6 | -3.128788 | 1.923796  | -0.726810 |
| 6 | -1.667869 | 3.698548  | 0.849648  |
| 1 | -0.534141 | 1.998510  | 1.462102  |
| 6 | -3.455144 | 3.264287  | -0.724199 |
| 1 | -3.689263 | 1.244409  | -1.362432 |
| 6 | -2.728773 | 4.169712  | 0.065754  |
| 1 | -1.101657 | 4.370704  | 1.484947  |
| 1 | -4.266723 | 3.644121  | -1.337828 |
| 6 | -2.759020 | -0.993652 | -0.037331 |
| 6 | -4.054832 | -0.747032 | 0.484495  |
| 6 | -2.533529 | -2.276436 | -0.586060 |
| 6 | -5.041204 | -1.709462 | 0.462146  |
| 1 | -4.267086 | 0.212377  | 0.946319  |
| 6 | -3.518909 | -3.251236 | -0.617831 |
| 1 | -1.571657 | -2.502053 | -1.037069 |
| 6 | -4.787654 | -2.975809 | -0.090997 |
| 1 | -6.022803 | -1.513905 | 0.883810  |
| 1 | -3.298233 | -4.213691 | -1.066375 |
| 8 | 4.262691  | -2.944529 | 0.888769  |
| 8 | -5.815447 | -3.846745 | -0.067574 |
| 8 | -3.124873 | 5.456370  | 0.003922  |
| 6 | -2.414703 | 6.412958  | 0.771363  |
| 1 | -2.888127 | 7.373025  | 0.564052  |
| 1 | -2.486605 | 6.195619  | 1.843374  |
| 1 | -1.359845 | 6.455048  | 0.476567  |
| 6 | -5.607774 | -5.142855 | -0.601590 |
| 1 | -4.813718 | -5.672201 | -0.062285 |
| 1 | -6.551047 | -5.674049 | -0.471738 |
| 1 | -5.358769 | -5.098193 | -1.668161 |
| 6 | 3.295631  | -3.897585 | 1.301061  |
| 1 | 2.712863  | -3.524968 | 2.150559  |
| 1 | 3.860919  | -4.778688 | 1.604132  |
| 1 | 2.623697  | -4.157930 | 0.475935  |

Cartesian coordinates (Å) for molecule **11** (ground-state) obtained by DFT [PCM-PBE0/6-31G(d)]

E= -1380.71488583 au

|   |           |           |           |
|---|-----------|-----------|-----------|
| 6 | -3.100579 | 0.963911  | 0.443573  |
| 6 | -4.435672 | 0.721966  | 0.419442  |
| 6 | -4.950115 | -0.585084 | 0.042326  |
| 6 | -4.042687 | -1.606014 | -0.310504 |
| 6 | -2.578117 | -1.378723 | -0.312536 |
| 6 | -2.118041 | -0.038246 | 0.101743  |
| 1 | -7.023864 | -0.069393 | 0.290793  |
| 1 | -2.724582 | 1.940432  | 0.732494  |
| 6 | -6.326622 | -0.855043 | 0.020569  |
| 6 | -4.529030 | -2.866539 | -0.675054 |
| 6 | -5.890834 | -3.124506 | -0.691546 |
| 6 | -6.789686 | -2.111518 | -0.341949 |
| 1 | -3.807189 | -3.631852 | -0.943133 |
| 1 | -6.258148 | -4.106857 | -0.974554 |
| 1 | -7.858639 | -2.306735 | -0.353629 |
| 8 | -1.812088 | -2.288102 | -0.651807 |
| 6 | -0.781247 | 0.305418  | 0.182565  |
| 6 | 0.358395  | -0.517724 | -0.018683 |
| 1 | -0.582566 | 1.335106  | 0.479941  |
| 1 | 0.173181  | -1.575010 | -0.167856 |
| 6 | 1.660951  | -0.072430 | 0.003244  |
| 6 | 2.007835  | 1.360630  | -0.014773 |
| 6 | 1.382491  | 2.256486  | -0.891825 |
| 6 | 2.994956  | 1.875965  | 0.847438  |
| 6 | 1.702323  | 3.610937  | -0.909428 |
| 1 | 0.648632  | 1.881075  | -1.599513 |
| 6 | 3.313147  | 3.220943  | 0.852001  |
| 1 | 3.502607  | 1.207004  | 1.536786  |
| 6 | 2.668854  | 4.103101  | -0.028091 |
| 1 | 1.203941  | 4.264832  | -1.616264 |
| 1 | 4.062159  | 3.617419  | 1.531017  |
| 6 | 2.760696  | -1.048262 | 0.022545  |
| 6 | 4.000783  | -0.764865 | -0.583580 |
| 6 | 2.613130  | -2.305953 | 0.627783  |
| 6 | 5.024609  | -1.693406 | -0.599600 |
| 1 | 4.150181  | 0.194813  | -1.069411 |
| 6 | 3.634965  | -3.247108 | 0.626341  |
| 1 | 1.685605  | -2.546555 | 1.139418  |
| 6 | 4.852542  | -2.946039 | 0.005729  |
| 1 | 5.972314  | -1.473618 | -1.082104 |
| 1 | 3.479476  | -4.200049 | 1.119749  |
| 8 | -5.401333 | 1.618348  | 0.729888  |
| 8 | 5.910074  | -3.782520 | -0.055032 |
| 8 | 3.054584  | 5.395148  | 0.045306  |
| 6 | 2.431556  | 6.325230  | -0.822100 |
| 1 | 2.877869  | 7.293503  | -0.593186 |
| 1 | 2.619446  | 6.078184  | -1.873658 |
| 1 | 1.350379  | 6.372335  | -0.646341 |
| 6 | 5.781052  | -5.063644 | 0.535268  |
| 1 | 4.973819  | -5.638873 | 0.066996  |
| 1 | 6.732043  | -5.569000 | 0.363977  |
| 1 | 5.598203  | -4.989322 | 1.613665  |
| 6 | -4.991474 | 2.915802  | 1.112195  |
| 1 | -4.371187 | 2.885178  | 2.016314  |
| 1 | -5.905762 | 3.474215  | 1.316138  |
| 1 | -4.432903 | 3.408464  | 0.306956  |

Cartesian coordinates (Å) for molecule **11** (excited-state) obtained by DFT [PCM-PBE0/6-31G(d)]

E(TD)= -1380.64377307au

|   |           |           |           |
|---|-----------|-----------|-----------|
| 6 | -3.067820 | 1.000552  | 0.408841  |
| 6 | -4.445955 | 0.791145  | 0.377769  |
| 6 | -4.970650 | -0.494356 | 0.036335  |
| 6 | -4.054434 | -1.541015 | -0.260904 |
| 6 | -2.597945 | -1.347055 | -0.223316 |
| 6 | -2.127372 | -0.005988 | 0.120347  |
| 1 | -7.047608 | 0.057131  | 0.220388  |
| 1 | -2.687993 | 1.986202  | 0.661295  |
| 6 | -6.357119 | -0.747904 | -0.009959 |
| 6 | -4.563413 | -2.805189 | -0.592988 |
| 6 | -5.927465 | -3.039789 | -0.637093 |
| 6 | -6.829884 | -2.003447 | -0.342681 |
| 1 | -3.849837 | -3.592988 | -0.814786 |
| 1 | -6.301445 | -4.025765 | -0.899696 |
| 1 | -7.900043 | -2.187739 | -0.375953 |
| 8 | -1.824317 | -2.297201 | -0.474083 |
| 6 | -0.742824 | 0.359247  | 0.184059  |
| 6 | 0.349237  | -0.437239 | -0.100788 |
| 1 | -0.556020 | 1.380407  | 0.515743  |
| 1 | 0.130840  | -1.467162 | -0.363354 |
| 6 | 1.711911  | -0.038018 | -0.046536 |
| 6 | 2.097792  | 1.368049  | -0.044300 |
| 6 | 1.423247  | 2.324407  | -0.829627 |
| 6 | 3.169455  | 1.838058  | 0.752072  |
| 6 | 1.782969  | 3.664865  | -0.832064 |
| 1 | 0.620073  | 1.997720  | -1.483466 |
| 6 | 3.528216  | 3.170434  | 0.769980  |
| 1 | 3.701257  | 1.138715  | 1.390781  |
| 6 | 2.840226  | 4.101449  | -0.024349 |
| 1 | 1.246090  | 4.356991  | -1.471471 |
| 1 | 4.337301  | 3.523730  | 1.402531  |
| 6 | 2.731514  | -1.067182 | -0.003149 |
| 6 | 4.050703  | -0.839257 | -0.473703 |
| 6 | 2.449536  | -2.367347 | 0.476884  |
| 6 | 5.006727  | -1.832006 | -0.463322 |
| 1 | 4.307110  | 0.131517  | -0.886598 |
| 6 | 3.403731  | -3.372139 | 0.495717  |
| 1 | 1.463779  | -2.584812 | 0.877048  |
| 6 | 4.697743  | -3.112875 | 0.024217  |
| 1 | 6.006880  | -1.649081 | -0.845261 |
| 1 | 3.138226  | -4.347571 | 0.888490  |
| 8 | -5.354896 | 1.737694  | 0.653320  |
| 8 | 5.699459  | -4.013492 | -0.005708 |
| 8 | 3.267788  | 5.377595  | 0.058016  |
| 6 | 2.600331  | 6.357666  | -0.717444 |
| 1 | 3.094761  | 7.303395  | -0.493725 |
| 1 | 2.688782  | 6.145532  | -1.789319 |
| 1 | 1.540811  | 6.426845  | -0.444852 |
| 6 | 5.435414  | -5.325395 | 0.460685  |
| 1 | 4.645295  | -5.805011 | -0.128533 |
| 1 | 6.366627  | -5.879089 | 0.337849  |
| 1 | 5.151028  | -5.321319 | 1.519325  |
| 6 | -4.915234 | 3.040586  | 1.003331  |
| 1 | -4.308470 | 3.019263  | 1.915192  |
| 1 | -5.821191 | 3.619922  | 1.180432  |
| 1 | -4.342350 | 3.494875  | 0.187501  |

Frontier molecular orbitals obtained for **10** and **11**

LUMO

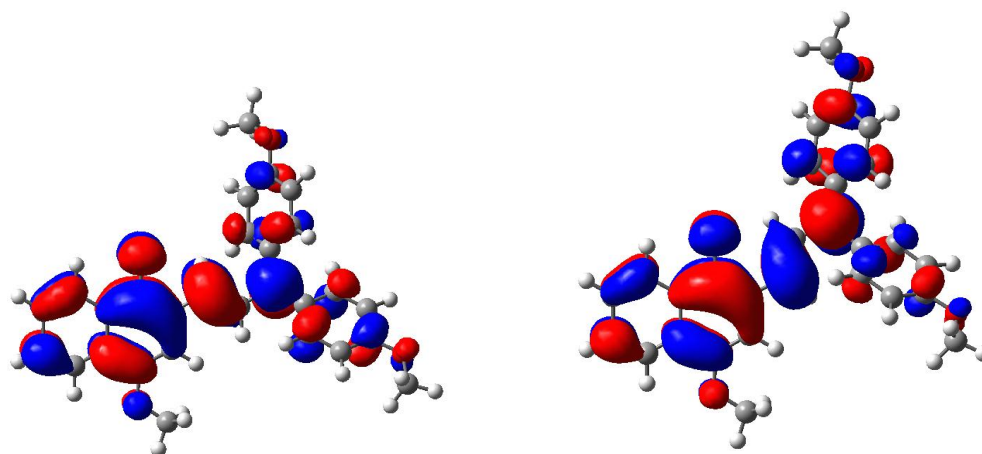

HOMO

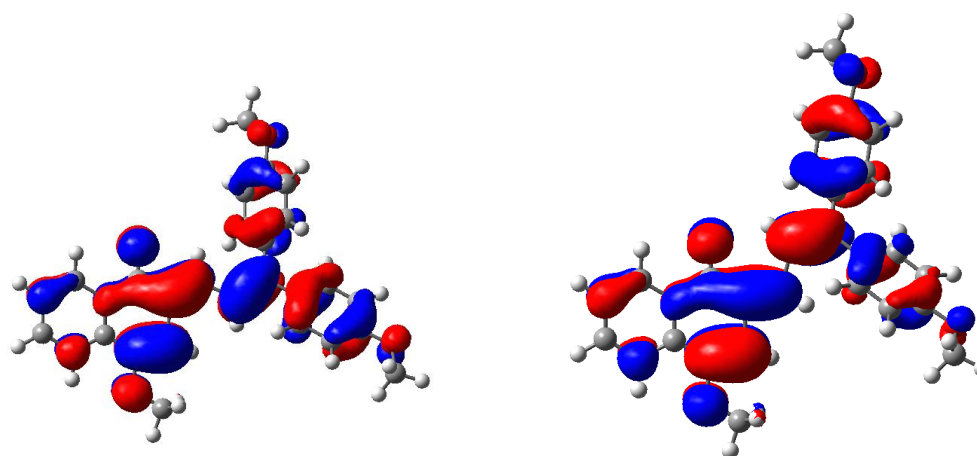

**10**

**11**



Vibrationally resolved spectrum (stick+convoluted) computed for **10** and **11**

We note that the spectra are more structured than experimentally, but this is only related to the choice of a rather narrow broadening Gaussian, allowing to see that the vibrational couplings are indeed similar for the two dyes, but that the absolute intensities ( $\epsilon$ ) are not.

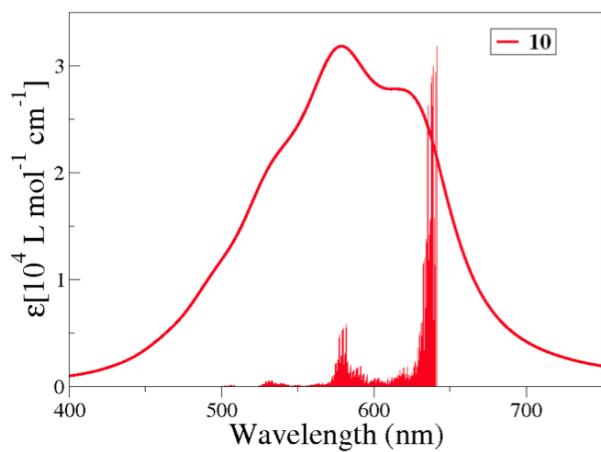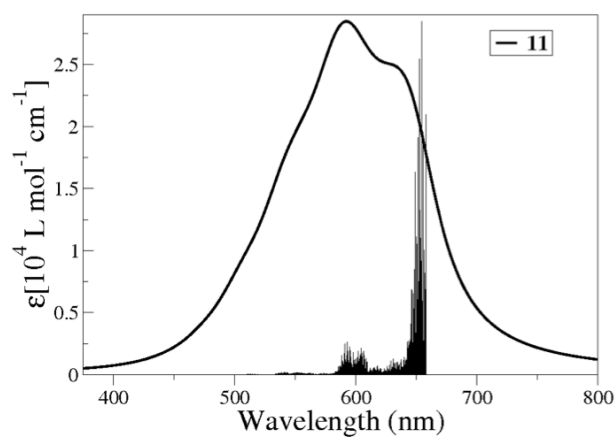

Supplement: c4cc03435j1.pdf [file c4cc03435j1.pdf]
